# Supplementary material for: In-Host Flat-like Quasispecies: Characterization Methods and Clinical Implications
Source: MDPI journal article supplement (doi:10.3390/microorganisms12051011), 2024-05-17
Supplement: s1 [file s1]

# In-host flat-like quasispecies, methods and clinical implications

## Supplementary material - Near-flat quasispecies examples

Josep Gregori<sup>1</sup>, Sergi Colomer-Castell<sup>1,2,3</sup>, Marta Ibañez Lligoña<sup>1,2,4</sup>,  
Damir Garcia-Cehic<sup>1,2</sup>, Carolina Campos<sup>1,2,3</sup>, Maria Buti<sup>1,2,4</sup>,  
Mar Riveiro-Barciela<sup>1,2,4</sup>, Cristina Andrés<sup>5,6</sup>, Maria Piñana<sup>5,6</sup>,  
Alejandra Gonzalez-Sánchez<sup>5,6</sup>, Francisco Rodriguez-Frias<sup>2,7</sup>,  
Maria Francesca Cortese<sup>2,6,7</sup>, David Tabernero<sup>1,2,7</sup>, Tomás Pumarola<sup>3,5,6,7</sup>,  
Juan Ignacio Esteban<sup>1,2,4</sup>, Andrés Antón<sup>5,6</sup>, and Josep Quer<sup>1,2,3,4</sup>

<sup>1</sup> Liver Diseases-Viral Hepatitis, Liver Unit, Vall d'Hebron Institut de Recerca (VHIR), Vall d'Hebron Hospital Universitari, Vall d'Hebron Barcelona Hospital Campus, Passeig Vall d'Hebron 119-129, 08035 Barcelona, Spain

<sup>2</sup> Centro de Investigación Biomédica en Red de Enfermedades Hepáticas y Digestivas (CIBERehd), Instituto de Salud Carlos III, Av. Monforte de Lemos, 3-5, 28029 Madrid, Spain

<sup>3</sup> Biochemistry and Molecular Biology Department, UAB, Bellaterra, Spain

<sup>4</sup> Medicine Department, Universitat Autònoma de Barcelona (UAB), Campus de la UAB, Plaça Cívica, 08193 Bellaterra, Spain

<sup>5</sup> Centro de Investigación Biomédica en Red de Enfermedades Infecciosas (CIBERINFEC), Instituto de Salud Carlos III, Av. Monforte de Lemos, 3-5, 28029 Madrid, Spain

<sup>6</sup> Microbiology Department, Vall d'Hebron Institut de Recerca (VHIR), Vall d'Hebron Hospital Universitari, Vall d'Hebron Barcelona Hospital Campus, Passeig Vall d'Hebron 119-129, 08035 Barcelona, Spain

<sup>7</sup> Biochemistry Department, Vall d'Hebron Institut de Recerca (VHIR), Vall d'Hebron Hospital Universitari, Vall d'Hebron Barcelona Hospital Campus, Passeig Vall d'Hebron 119-129, 08035 Barcelona, Spain

Corresponding authors:

Josep Gregori (josep.gregori@gmail.com) and Josep Quer (josep.quer@vhir.org)

## Near-flat quasispecies - HCV treatment failures

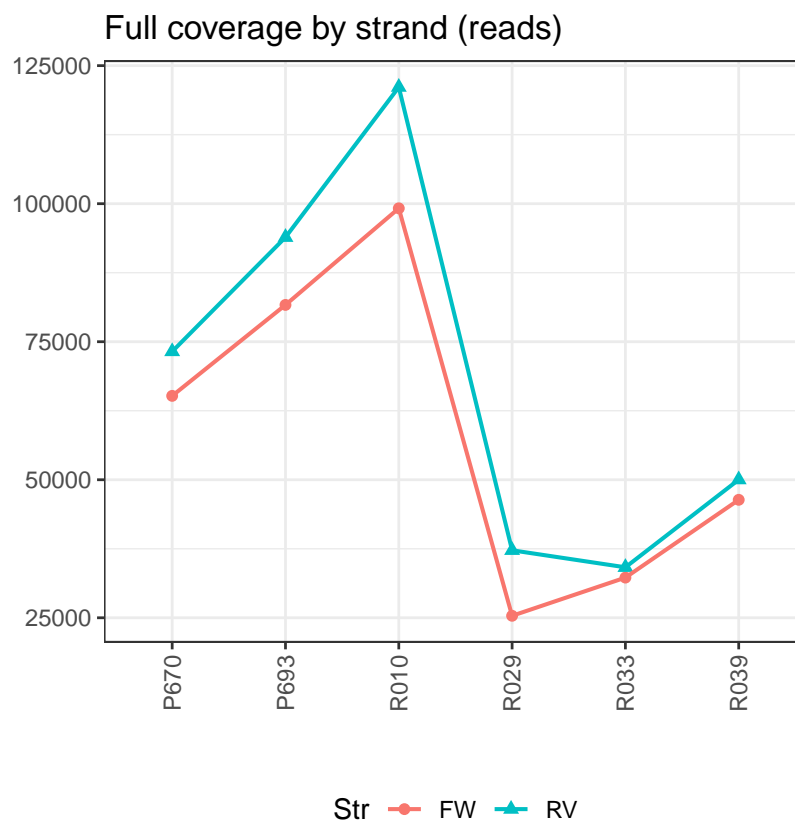

Figure NF-1: Coverage by amplicon and strand in read number.

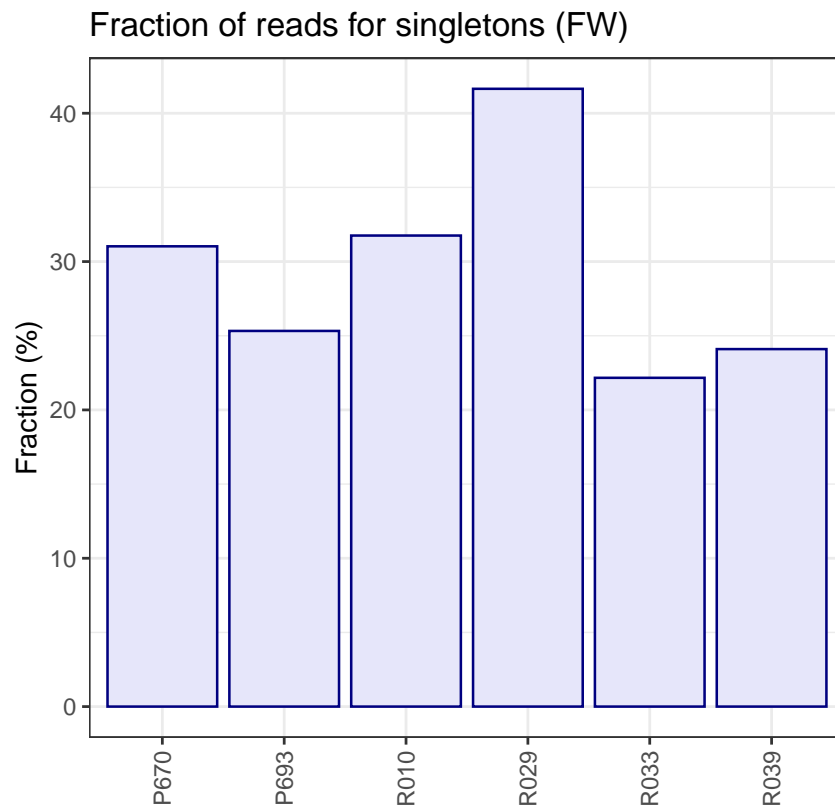

Figure NF-2: Fraction of reads for singletons observed with forward strand reads.

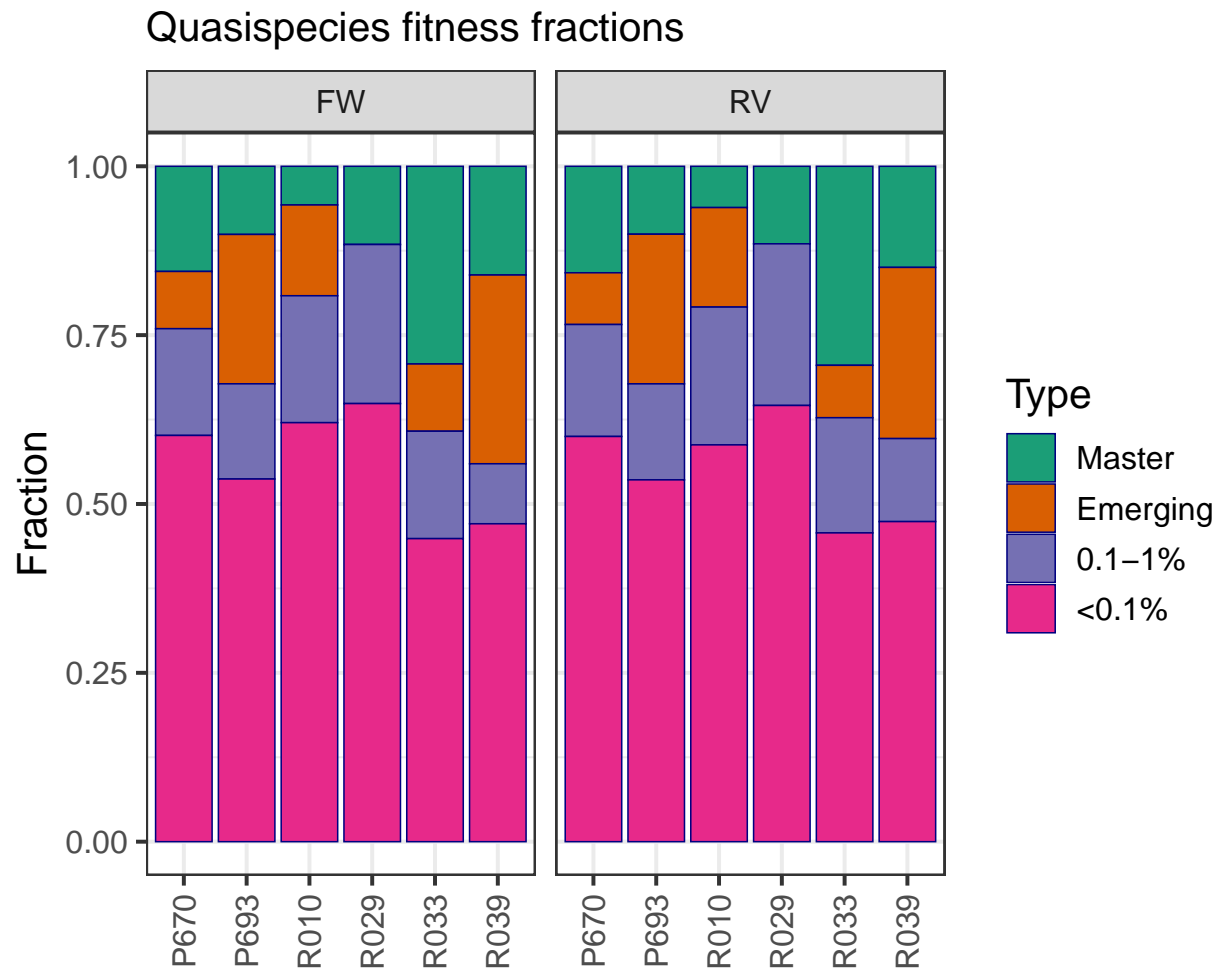

Figure NF-3: Quasispecies fitness fractions.

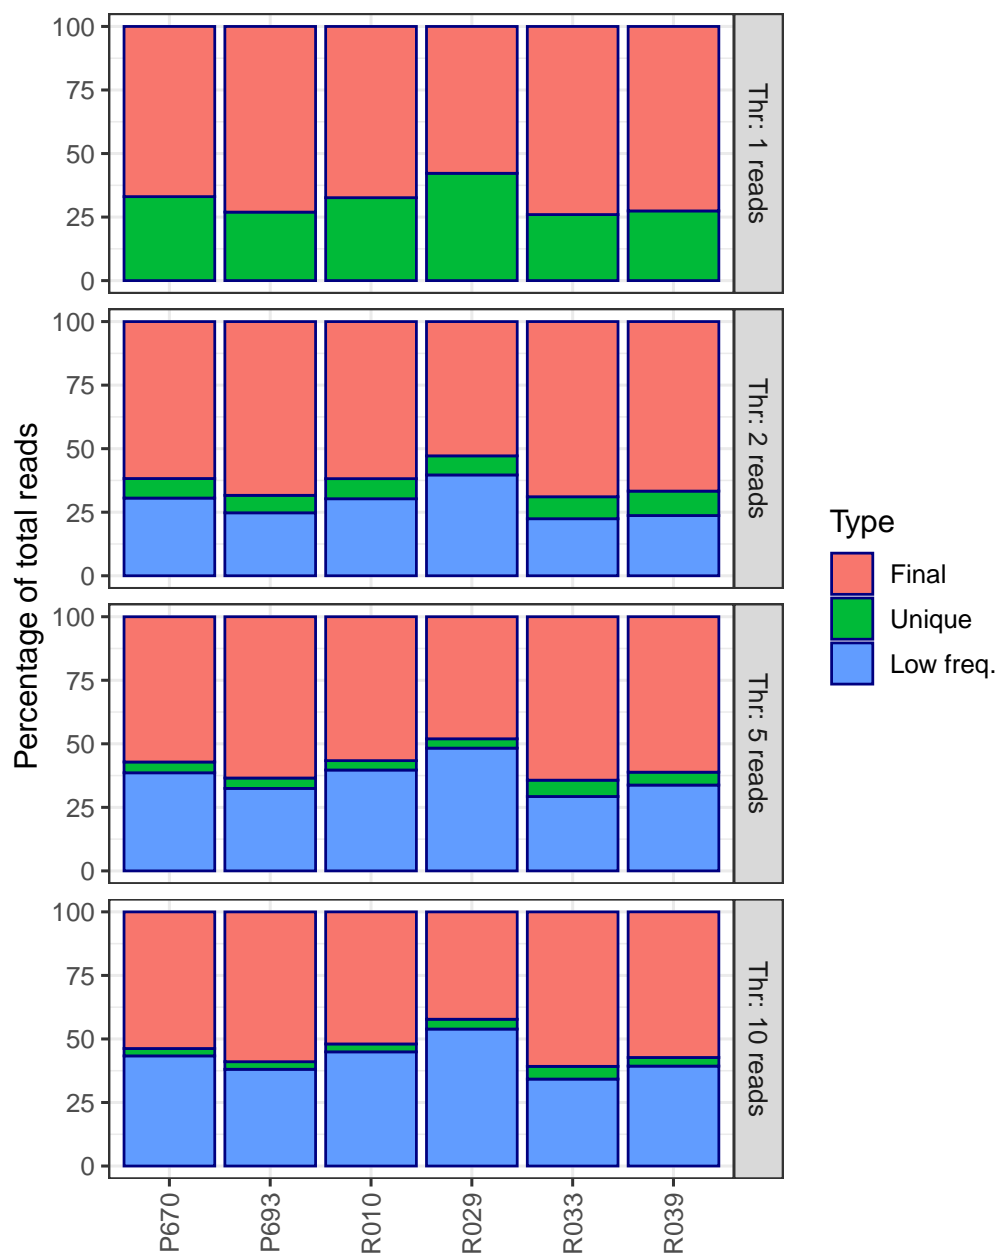

Figure NF-4: Impact of abundance filter followed by haplotype strand intersection. Abundance thresholds at 1, 2, 5 and 10 reads.

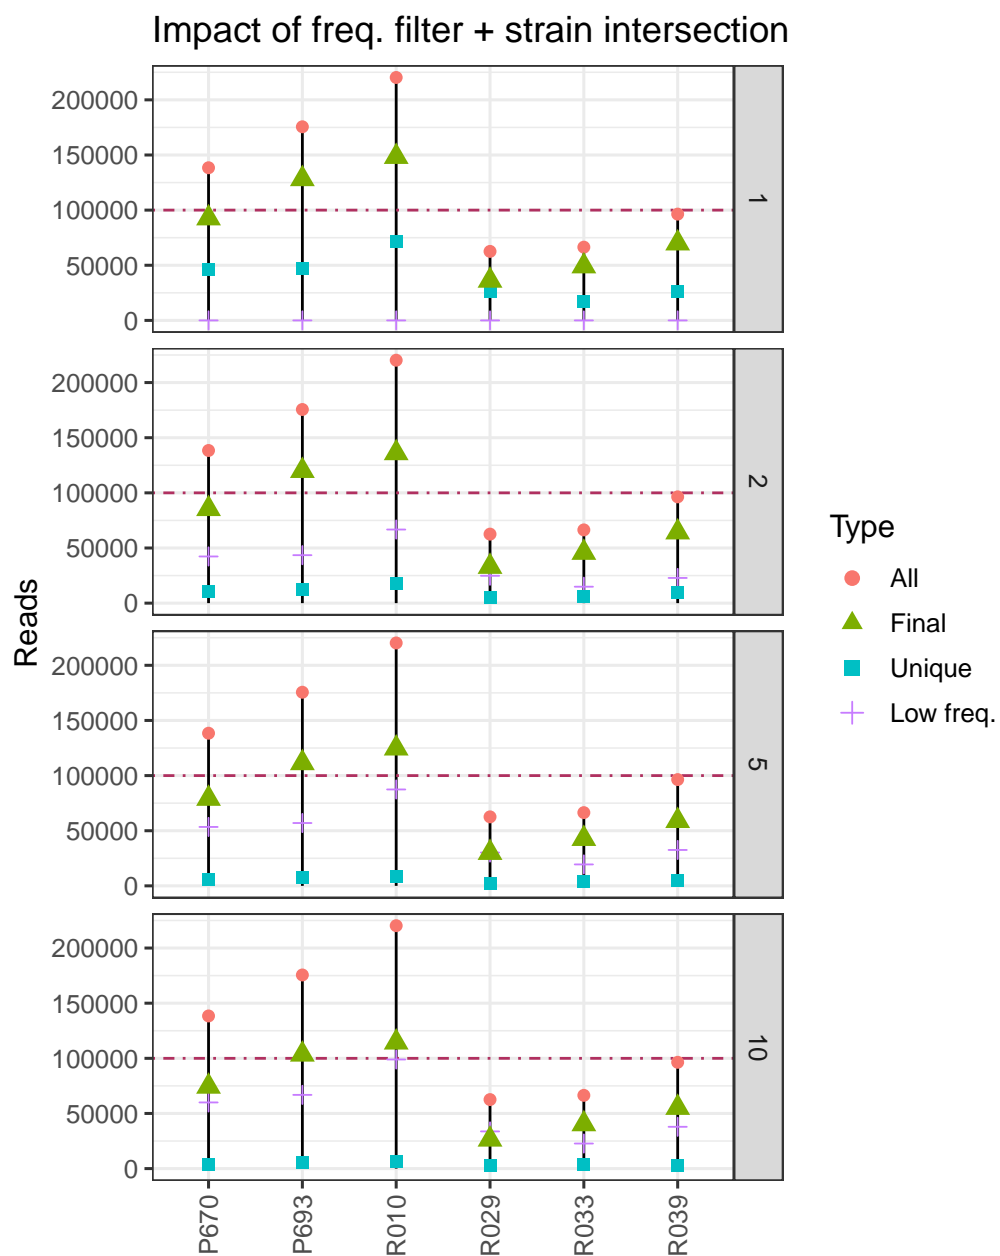

Figure NF-5: Impact of abundance filter followed by haplotype strand intersection. Abundance thresholds at 1, 2, 5 and 10 reads.

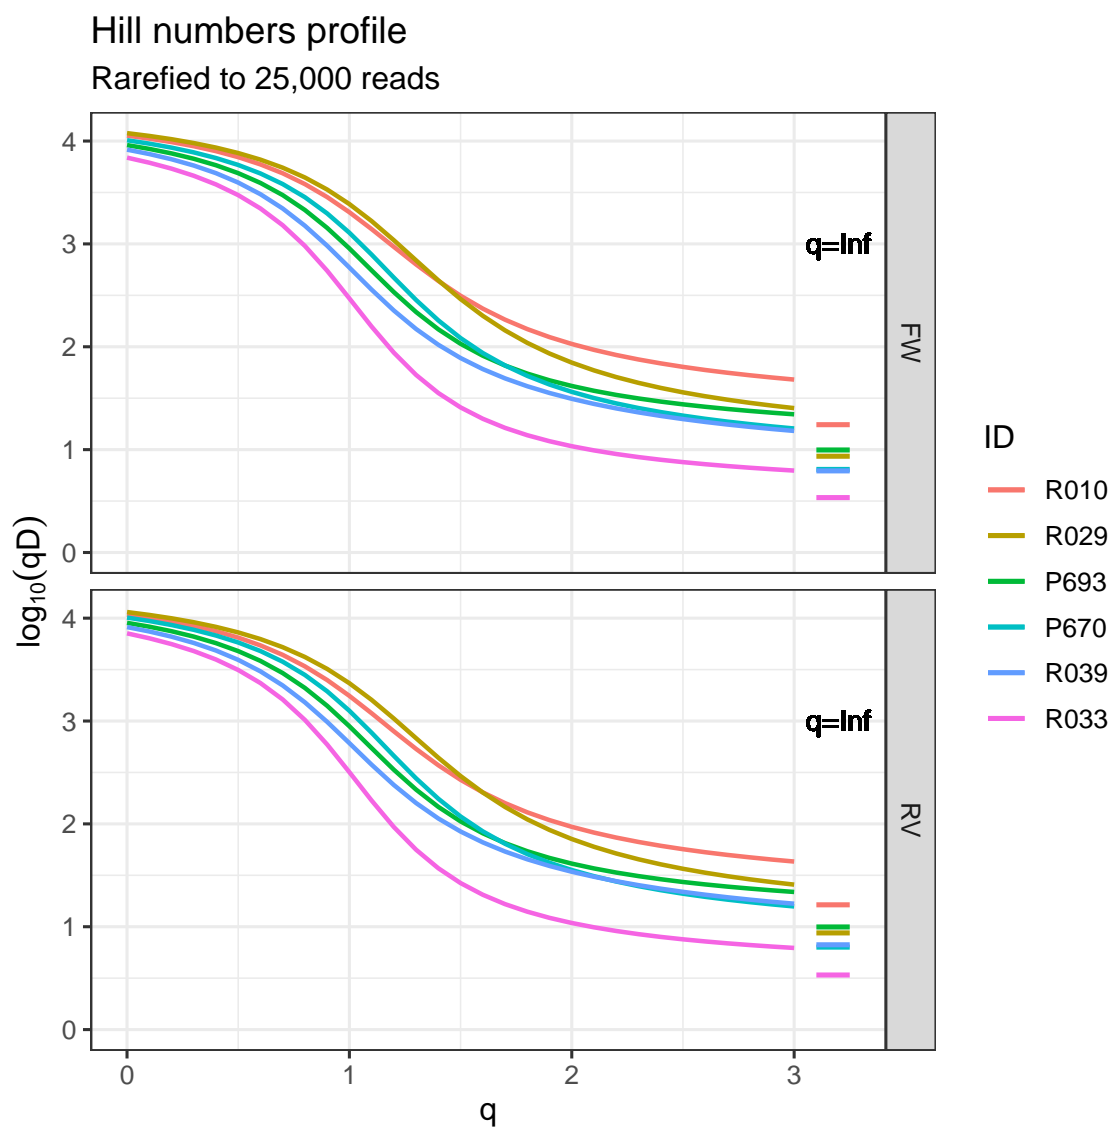

Figure NF-6: Hill numbers (HN) profiles rarefied to 25,000 reads.

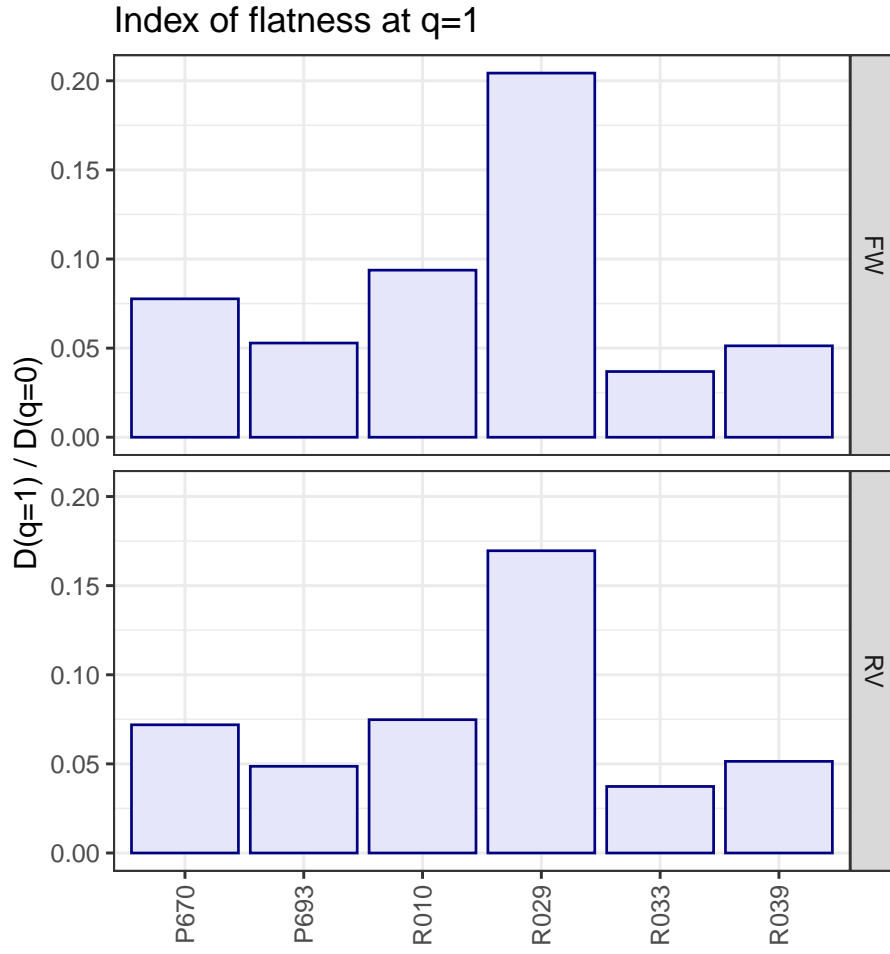

Figure NF-7: Evenness index  ${}^1E = {}^1D/{}^0D$ .



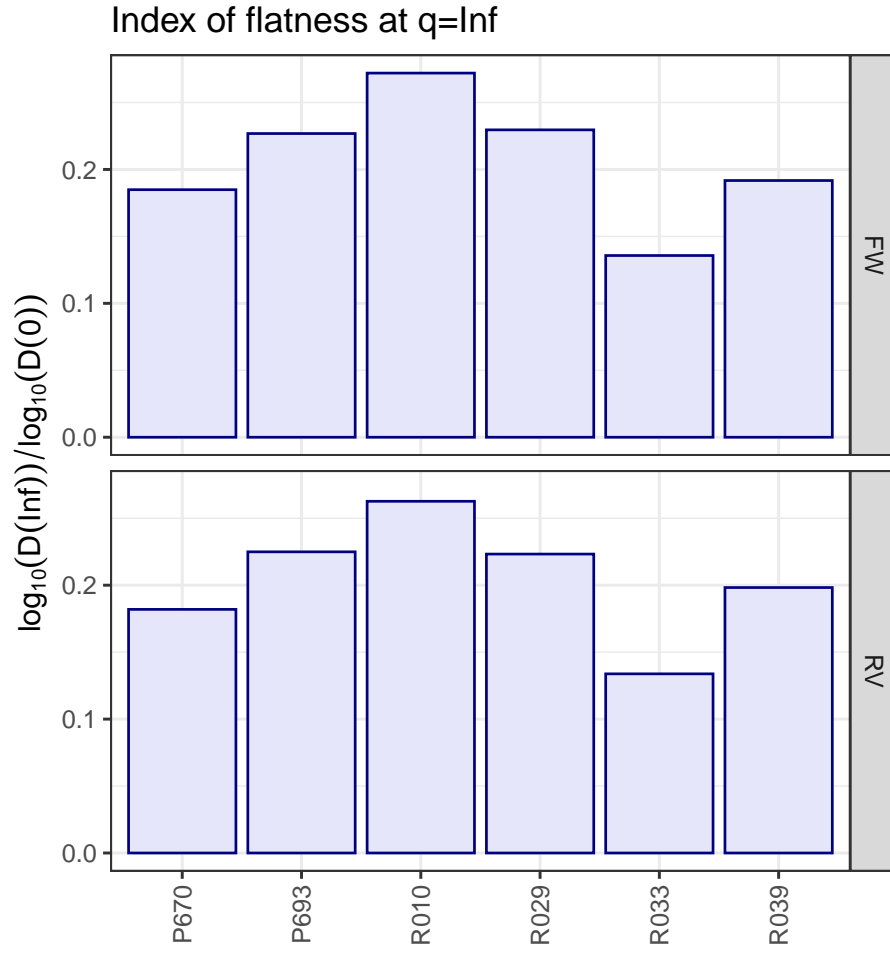

Figure NF-8: Evenness index  $e\text{Inf}$ ,  $\log_{10}({}^{\infty}D) / \log_{10}({}^0D)$ .



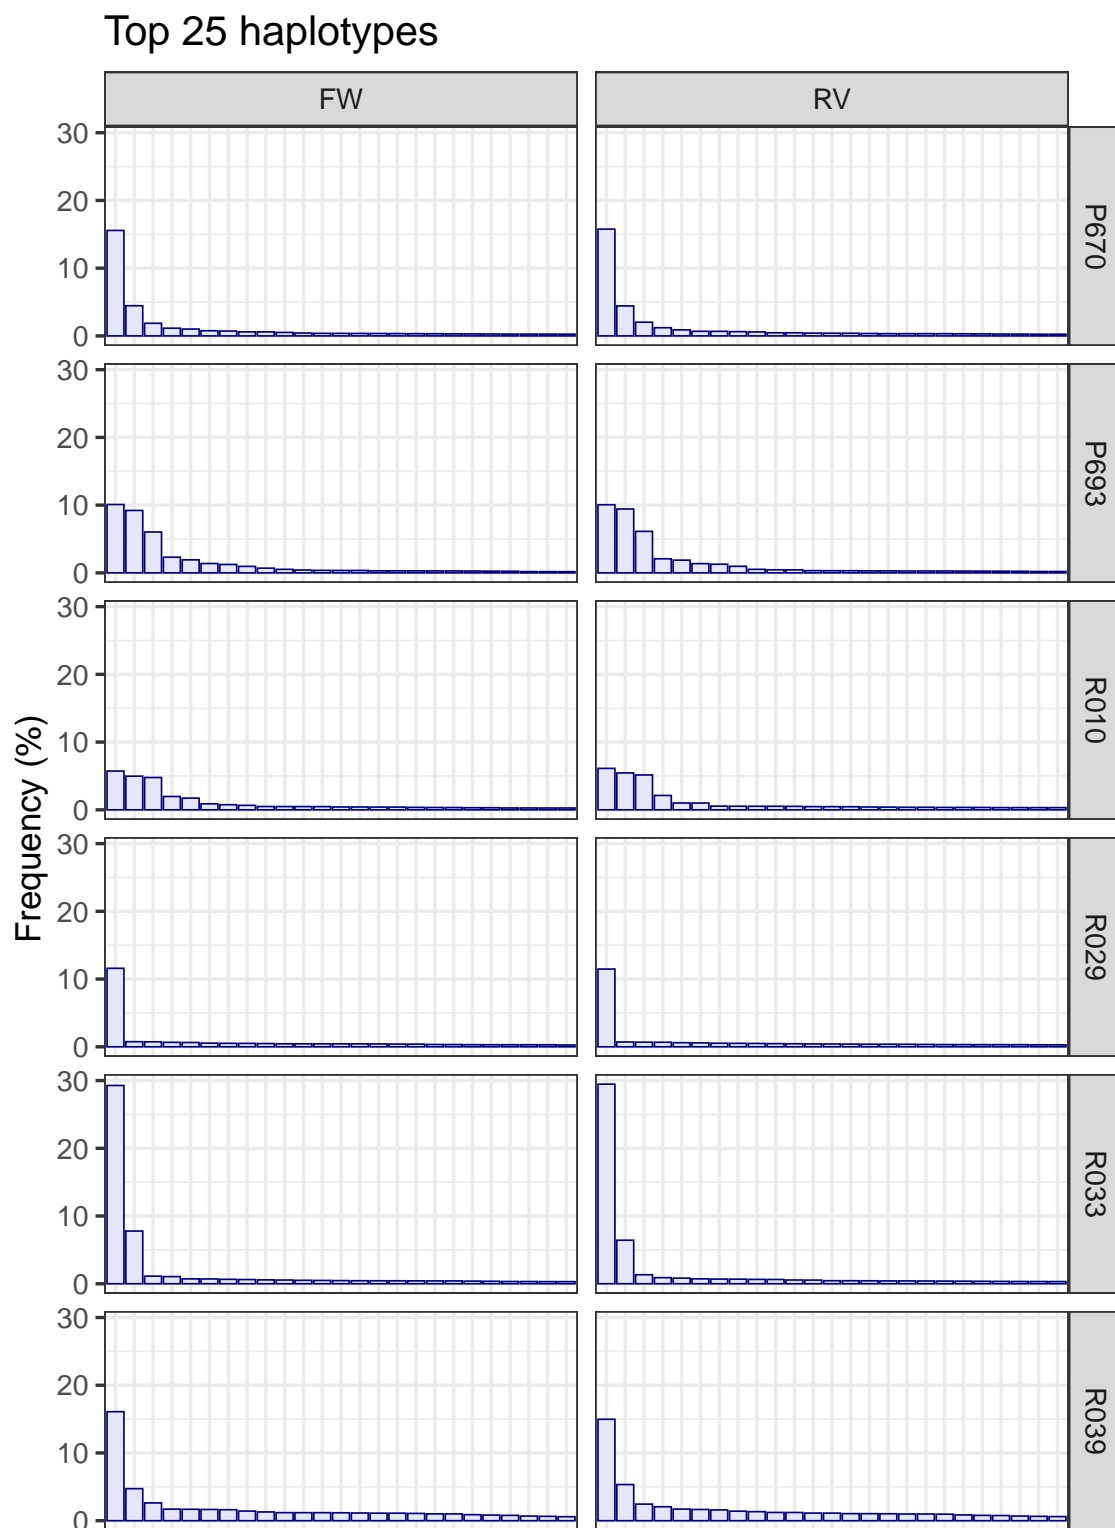

Figure NF-10: Frequencies of top 25 haplotypes.

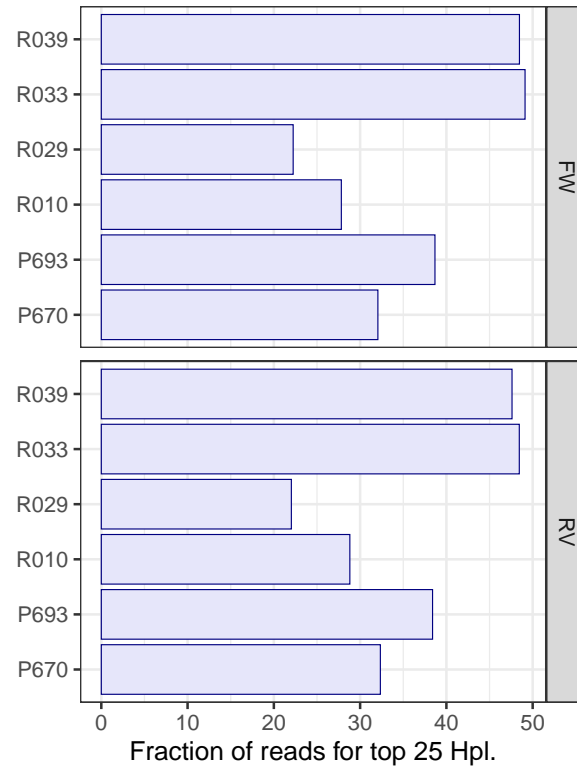

Figure NF-11: Fraction of reads for 25 top haplotypes.

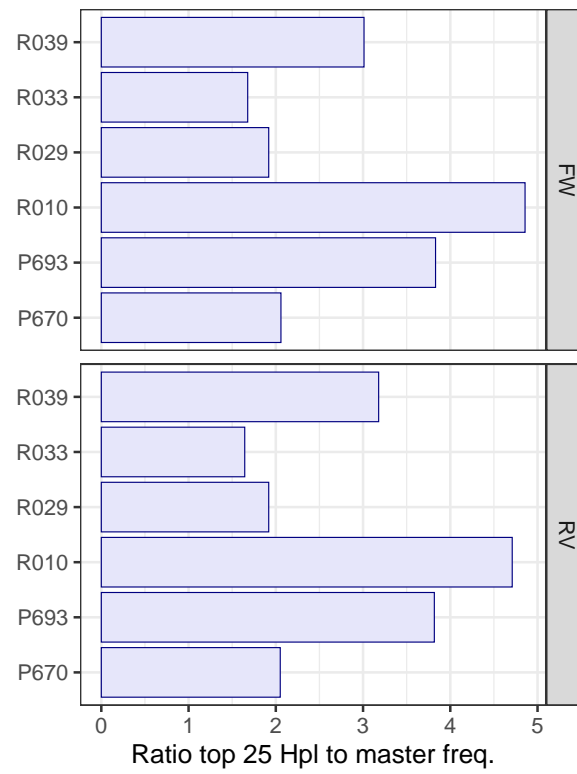

Figure NF-12: Ratio of reads for 25 top haplotypes to master haplotype.

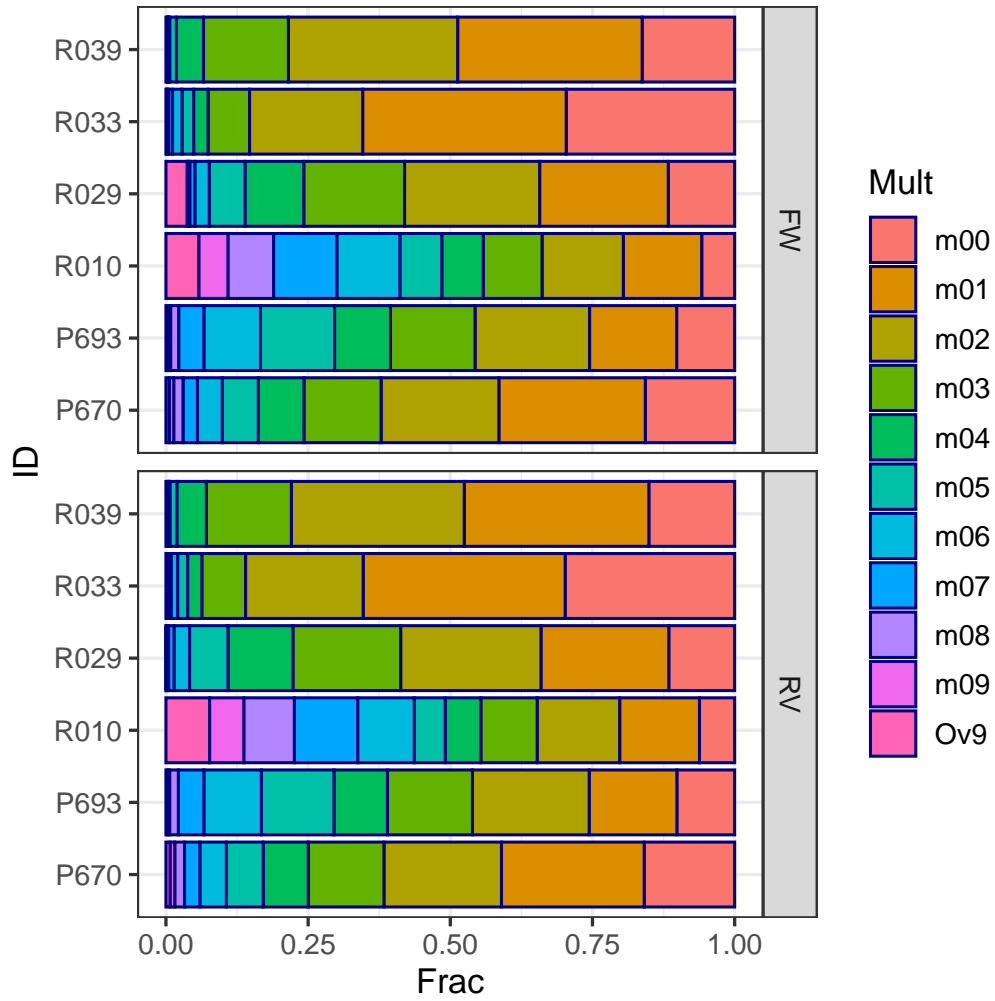

Figure NF-13: Fractions of reads with increasing number of substitutions with respect to the master haplotype in each sample. m00: fraction of reads for the master haplotype, m0x: fraction of reads for haplotypes showing x substitutions, Ov0: fraction of reads with over 9 substitutions.

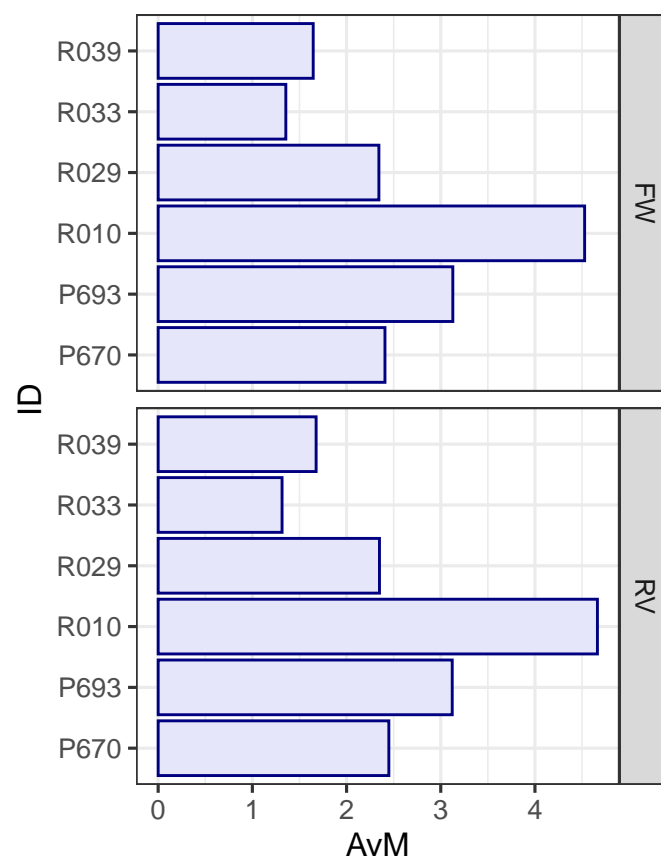

Figure NF-14: Mean number of substitutions per read with respect to the master haplotype in each amplicon and strand.
