# Supplementary material for: In-Host Flat-like Quasispecies: Characterization Methods and Clinical Implications
Source: MDPI journal article supplement (doi:10.3390/microorganisms12051011), 2024-05-17

# Subsampling evenness at q=1

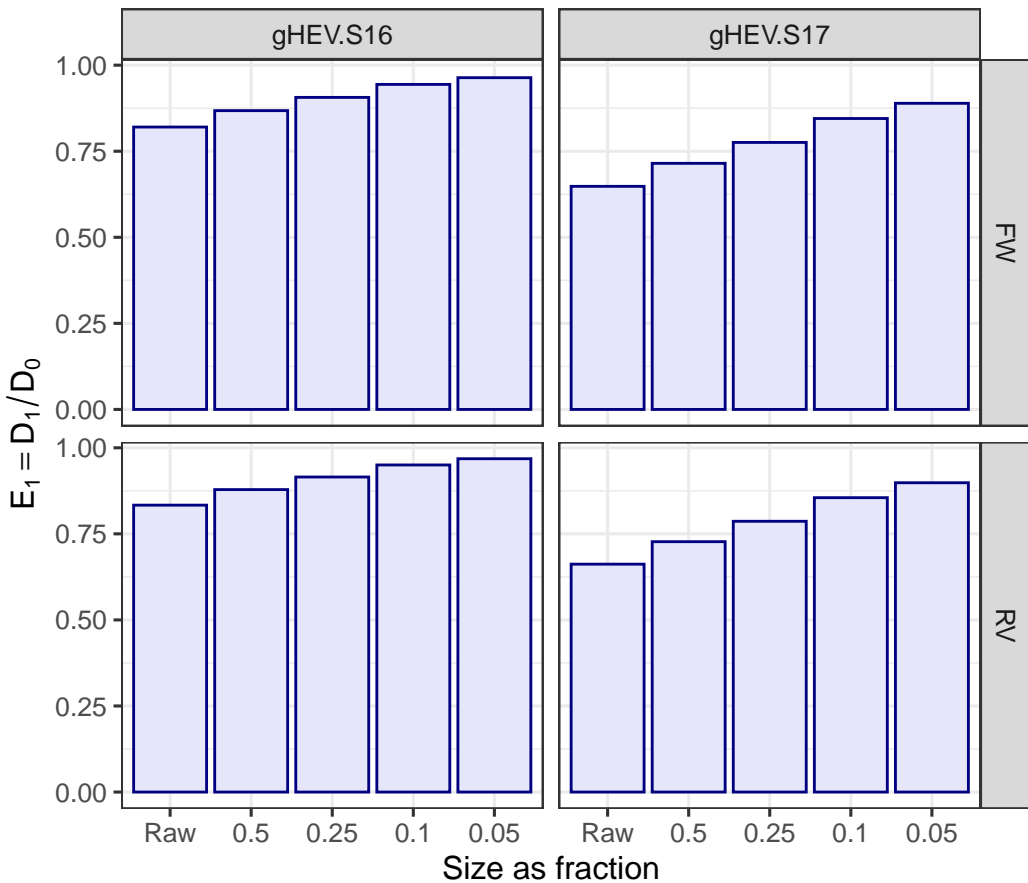

# Subsampling evenness at q=2

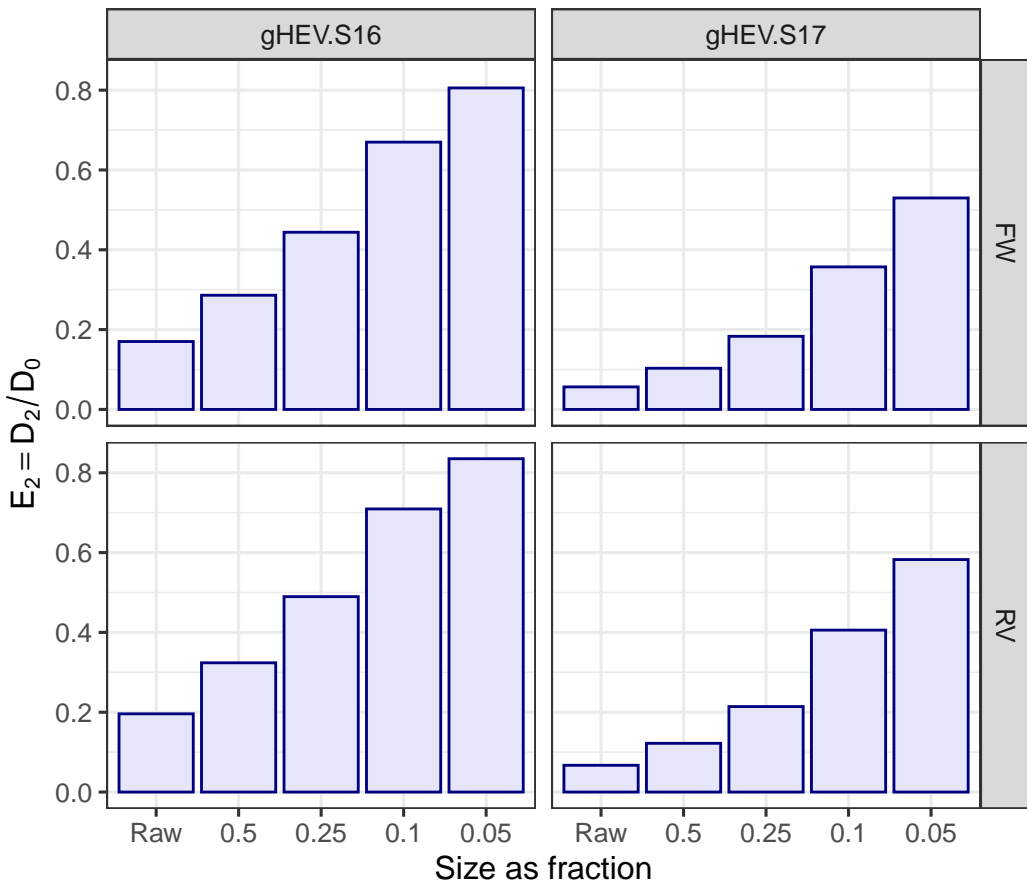

# Subsampling evenness at q=Infinity

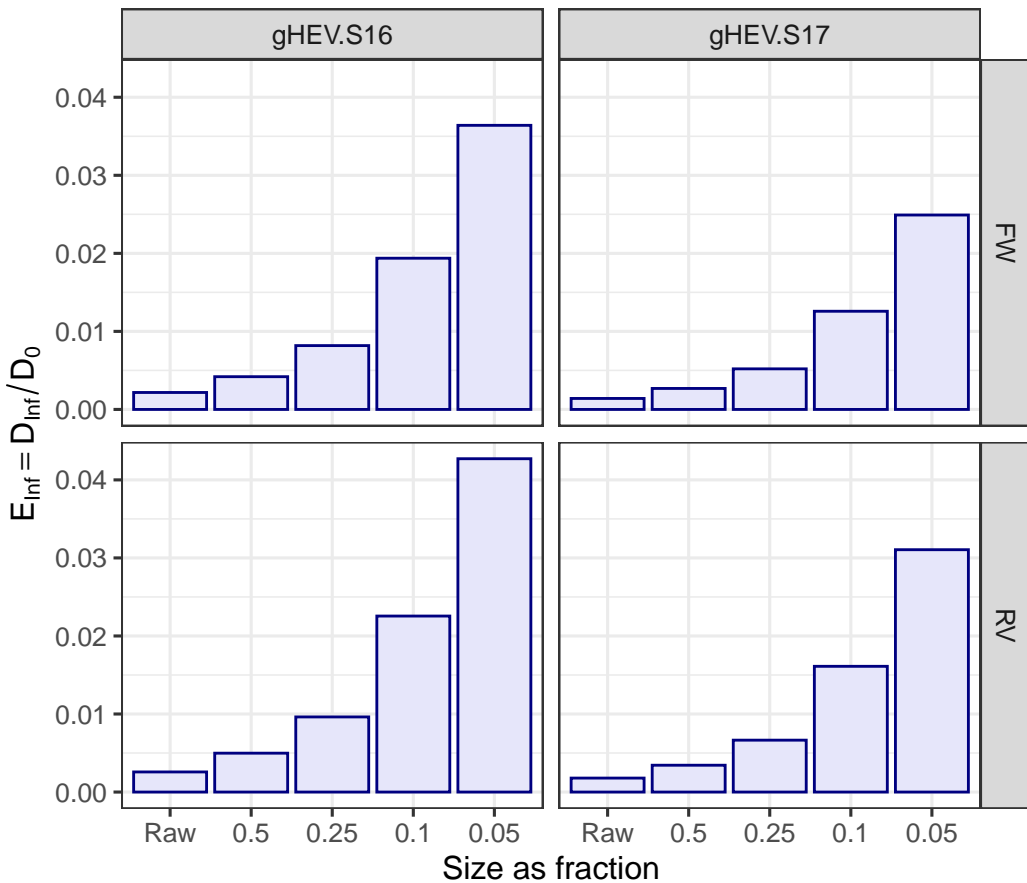

# Subsampling evenness at q=Infinity

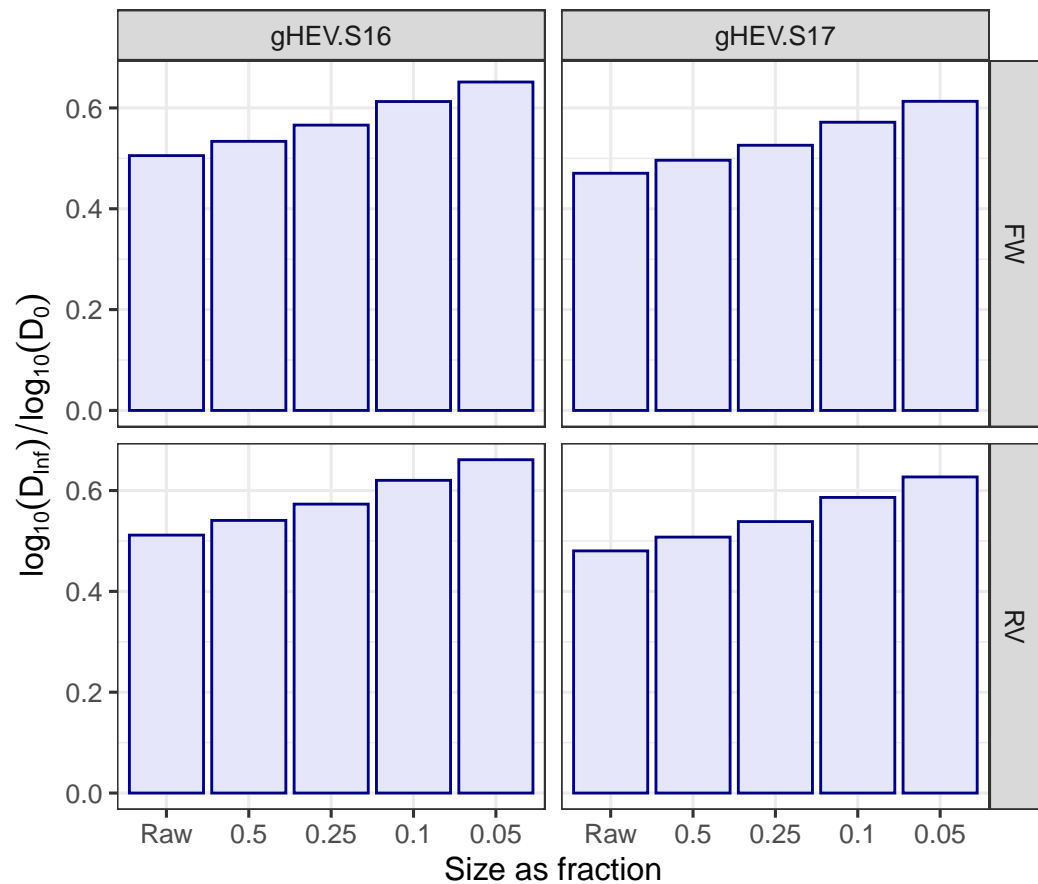

Supplement: s1 [file s1]
