# Supplementary material for: In-Host Flat-like Quasispecies: Characterization Methods and Clinical Implications
Source: MDPI journal article supplement (doi:10.3390/microorganisms12051011), 2024-05-17
Supplement: s1 [file s1]

# Relative logarithmic evenness

Rarefied to 194,000 reads

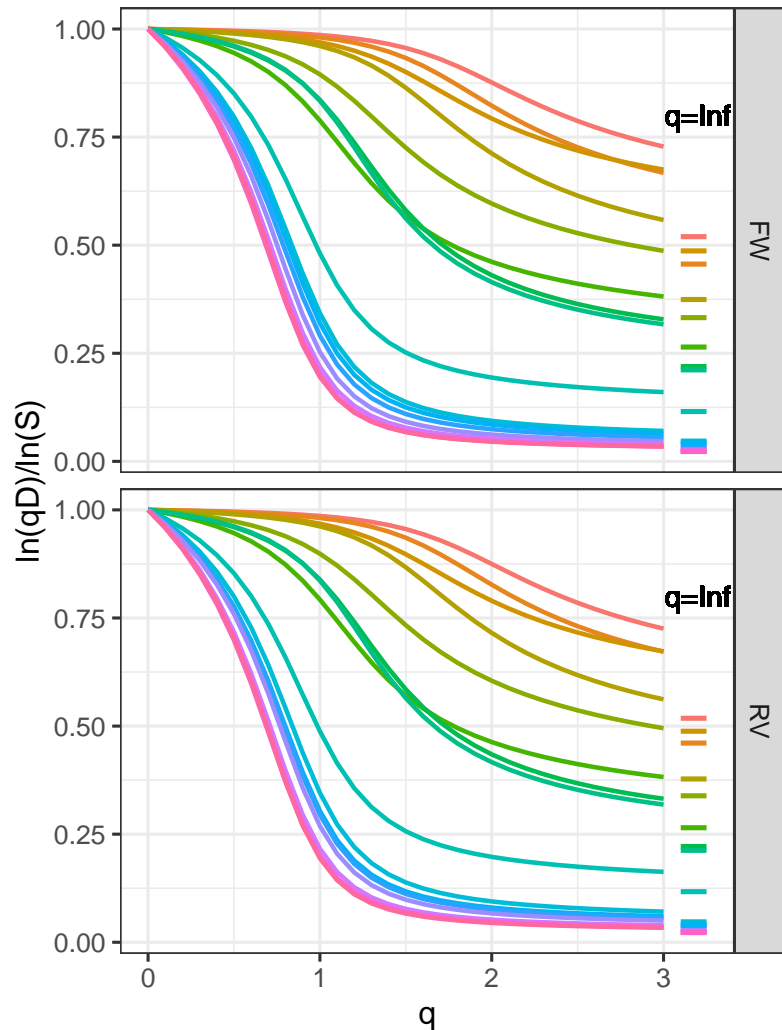

ID

- gHEV.S16
- gHEV.S13
- gHEV.S17
- gHEV.S15
- gHEV.S14
- gHEV.S12
- gHEV.S10
- gHEV.S11
- HCV-1B.S05
- EV-A71.S04
- HMPV-B.S06
- CoV-OC43.S03
- CoV-NL63.S02
- RSV-A.S07
- RSV-B.S08
- SARS-CoV-2.S09
- CoV-HKU1.S01
