# Supplementary material for: In-Host Flat-like Quasispecies: Characterization Methods and Clinical Implications
Source: MDPI journal article supplement (doi:10.3390/microorganisms12051011), 2024-05-17
Supplement: s1 [file s1]

# In-host flat-like quasispecies, methods and clinical implications

## Supplementary material

Josep Gregori<sup>1</sup>, Sergi Colomer-Castell<sup>1,2,3</sup>, Marta Ibañez Lligoña<sup>1,2,4</sup>,  
Damir Garcia-Cehic<sup>1,2</sup>, Carolina Campos<sup>1,2,3</sup>, Maria Buti<sup>1,2,4</sup>,  
Mar Riveiro-Barciela<sup>1,2,4</sup>, Cristina Andrés<sup>5,6</sup>, Maria Piñana<sup>5,6</sup>,  
Alejandra Gonzalez-Sánchez<sup>5,6</sup>, Francisco Rodríguez-Frías<sup>2,7</sup>,  
Maria Francesca Cortese<sup>2,6,7</sup>, David Tabernero<sup>1,2,6</sup>, Tomás Pumarola<sup>3,5,6,7</sup>,  
Juan Ignacio Esteban<sup>1,2,4</sup>, Andrés Antón<sup>5,6</sup>, and Josep Quer<sup>1,2,3,4</sup>

<sup>1</sup> Liver Diseases-Viral Hepatitis, Liver Unit, Vall d'Hebron Institut de Recerca (VHIR), Vall d'Hebron Hospital Universitari, Vall d'Hebron Barcelona Hospital Campus, Passeig Vall d'Hebron 119-129, 08035 Barcelona, Spain

<sup>2</sup> Centro de Investigación Biomédica en Red de Enfermedades Hepáticas y Digestivas (CIBERehd), Instituto de Salud Carlos III, Av. Monforte de Lemos, 3-5, 28029 Madrid, Spain

<sup>3</sup> Biochemistry and Molecular Biology Department, UAB, Bellaterra, Spain

<sup>4</sup> Medicine Department, Universitat Autònoma de Barcelona (UAB), Campus de la UAB, Plaça Cívica, 08193 Bellaterra, Spain

<sup>5</sup> Centro de Investigación Biomédica en Red de Enfermedades Infecciosas (CIBERINFEC), Instituto de Salud Carlos III, Av. Monforte de Lemos, 3-5, 28029 Madrid, Spain

<sup>6</sup> Microbiology Department, Vall d'Hebron Institut de Recerca (VHIR), Vall d'Hebron Hospital Universitari, Vall d'Hebron Barcelona Hospital Campus, Passeig Vall d'Hebron 119-129, 08035 Barcelona, Spain

<sup>7</sup> Biochemistry Department, Vall d'Hebron Institut de Recerca (VHIR), Vall d'Hebron Hospital Universitari, Vall d'Hebron Barcelona Hospital Campus, Passeig Vall d'Hebron 119-129, 08035 Barcelona, Spain

Corresponding authors:

Josep Gregori (josep.gregori@gmail.com) and Josep Quer (josep.quer@vhir.org)

## 1 Diversities, evenness and sampling size

Higher evenness values are observed for the samples S18 and S19, than for the corresponding replicates at approximately four-fold coverage, S16 and S17 (Supplementary Figures S5 and S6). On the other hand, in Supplementary Figure S3 we see lower values for  ${}^0D$  in S18 and S19 than in S16 and S17, but approximately the same values for  ${}^\infty D$ . These results suggest that lower coverages will result in higher evenness values, and the contrary, that higher coverages will result in smoothed evenness values. To confirm this hypothesis, samples S16 and S17 were taken as reference quasispecies populations and were submitted to repeated rarefaction (subsampling without replacement) at coverage fractions 0.5, 0.25, 0.1, and 0.05. The subsampling was repeated 500 times for each sample and fraction, and the Hill numbers of orders 0, 1, 2, 3, and infinity were computed each time. The averages of the 500 values for each sample, fraction, and Hill number are shown in Supplementary Figure S10 and Supplementary Table S12. The corresponding evenness values are shown in Supplementary Figure S11 and Supplementary Table S13. The two samples in both strands show the same results, a significant drop in  ${}^0D$  as we reduce the fraction of sampled reads, drop which is reduced as  $q$  increases, and which is practically null at  ${}^\infty D$ . The same behavior as observed in Supplementary Figure 3 with the pairs S16-S18 and S17-S19. The rationale behind these results is that the sample size has stronger effect on the number of observed haplotypes than in the observed frequency of the master haplotype (see Supplementary Table S12). This is a direct consequence of the different sensitivity of the Hill numbers to sampling effort; at higher coverages the number of observed haplotypes is also higher, but the master sequence, that is the haplotype with the highest frequency, is observed at approximately the same frequency in both cases. Since it has highest frequency, it has the lowest sampling error. These results confirm the above stated hypothesis that given two different sample sizes, the resulting evenness index will be higher for the smaller sample.

The sample size effect on QFF, HNP and RLEP is normalized by rarefaction to 194,000 reads, and the results shown in Supplementary Figures S12, S13 and S14, and Supplementary Tables S14, S15 and S16. Note that S18 and S19 were excluded of the rarefaction because of their low coverage. Finally, Supplementary Figure S15 shows the impact of rarefaction on evenness values for each sample to the reference size of 194,000 reads. This is a scatter-plot of the relative difference (rarefied-raw)/rarefied versus the original sample size, for each sample;  ${}^1E$ ,  ${}^2E$ ,  ${}^\infty E$  values are represented. Beyond of a confirmation of what observed in subsampling S16 and S17 at different fractions of the original size, this plot shows a linear behaviour to rarefaction for  ${}^1E$ ,  ${}^2E$ ,  ${}^\infty E$ , except for the  ${}^1E$  values of flat-like quasispecies (S10 and above).

## 2 Supplementary tables

| Ampl.Nm    | Genebank   | Region  | Primer.FW                     | Primer.RV                  | 5' pos | 3' pos | ALen |
|------------|------------|---------|-------------------------------|----------------------------|--------|--------|------|
| CoV-HKU1   | MH940245.1 | Spike   | ATGCAGATGTAGGTATGCCCTACCACT   | ATTCTACGTTCCCAATTAAAGAGGT  | 23495  | 23900  | 354  |
| CoV-NL63   | ON554022.1 | Spike   | CTGCAAAATTTCTTGATGATAATGT     | TCAGACCAAGTAACATACAAAAGCA  | 21794  | 22220  | 376  |
| CoV-OC43   | PP187318.1 | Spike   | GCAGGTTTAATCCCTTCTACTTGGAAT   | CAGACCAACCCAAAATGCTTGT     | 24973  | 25359  | 336  |
| EV-A71     | OR800939.1 | VP1     | ATGCCGYTTTGAYGCAGATTTCAC      | CTGACGTGCTTCATCCTCAT       | 2844   | 3213   | 325  |
| HCV-1B     | AF054249   | E2      | ACTGGTTCGGCTGTACATGGATGA      | TGCACGTCCACGATGTTCTGATG    | 1985   | 2441   | 408  |
| HMPV-B     | MZ504966.1 | Glycop. | ATAGACATGTTCAAAGCAAAGATGA     | TGGCTTTTCTCTGTGGTTGT       | 6206   | 6634   | 381  |
| RSV-A      | PP151405.1 | Glycop. | TGCTGTAAACAGAAATTGCAGTTGCT    | TTGATATGCTGCAGCTTTGCTT     | 5924   | 6306   | 335  |
| RSV-B      | PP135061.1 | Glycop. | CATGTTAACAAACAGTGAGTTACTATCAT | AGGCTGACTTCAC'TTGGTAATGT   | 6415   | 6807   | 339  |
| SARS-CoV-2 | MN908947.3 | Spike   | CAGTGTATAACACACAGGAACAAAT     | ATT'TGTGGGTATGGCAATAGAGTTA | 23347  | 23713  | 315  |
| HCV-G1g    | AF166600.1 | NS5B    | CCACATCAACTCCGTGTGG           | CCGACGTACARTCTCTCRGTGAG    | 7952   | 8389   | 394  |
| HCV-G4a    | Y11604.1   | NS5B    | CCACATCARCTCCGTGTGG           | CCCACRTAGAGTCTYCTCTGTGAG   | 7952   | 8389   | 394  |
| HEV-ORF2   | LC770331.1 | Core    | GTCGTCTCAGCCAATGGCGAGCC       | CASARAANGTCTTNGARTACTGCT   | 6373   | 6784   | 363  |

Table S1: Specific primers and genome positions for each virus. ALen: amplicon length after trimming primers.

| ID  | Virus      | Strand | Reads   | Master | Rd1    | Rd5    |
|-----|------------|--------|---------|--------|--------|--------|
| S01 | CoV-HKU1   | FW     | 276,201 | 82.531 | 1.630  | 2.130  |
| S01 | CoV-HKU1   | RV     | 286,514 | 82.826 | 1.638  | 2.101  |
| S02 | CoV-NL63   | FW     | 211,999 | 75.754 | 3.145  | 4.030  |
| S02 | CoV-NL63   | RV     | 207,402 | 73.846 | 3.647  | 4.587  |
| S03 | CoV-OC43   | FW     | 368,214 | 70.946 | 3.971  | 5.038  |
| S03 | CoV-OC43   | RV     | 356,914 | 70.393 | 4.143  | 5.181  |
| S04 | EV-A71     | FW     | 344,096 | 63.891 | 5.285  | 7.585  |
| S04 | EV-A71     | RV     | 338,345 | 63.577 | 5.478  | 7.812  |
| S05 | HCV-1B     | FW     | 293,124 | 31.413 | 8.968  | 12.672 |
| S05 | HCV-1B     | RV     | 271,492 | 30.749 | 9.353  | 13.311 |
| S06 | HMPV-B     | FW     | 363,464 | 66.945 | 4.644  | 6.361  |
| S06 | HMPV-B     | RV     | 356,692 | 68.835 | 4.135  | 5.649  |
| S07 | RSV-A      | FW     | 272,451 | 79.638 | 2.093  | 2.730  |
| S07 | RSV-A      | RV     | 280,640 | 79.846 | 2.047  | 2.665  |
| S08 | RSV-B      | FW     | 347,637 | 81.978 | 1.728  | 2.116  |
| S08 | RSV-B      | RV     | 340,815 | 82.235 | 1.621  | 1.998  |
| S09 | SARS-CoV-2 | FW     | 263,457 | 82.432 | 1.490  | 1.987  |
| S09 | SARS-CoV-2 | RV     | 272,136 | 82.228 | 1.544  | 2.029  |
| S10 | gHEV       | FW     | 304,313 | 8.163  | 37.749 | 51.980 |
| S10 | gHEV       | RV     | 260,770 | 7.921  | 39.661 | 53.431 |
| S11 | gHEV       | FW     | 293,327 | 8.817  | 40.674 | 53.821 |
| S11 | gHEV       | RV     | 244,153 | 8.695  | 42.434 | 55.286 |
| S12 | gHEV       | FW     | 242,066 | 5.182  | 29.919 | 42.547 |
| S12 | gHEV       | RV     | 194,130 | 5.118  | 32.255 | 45.029 |
| S13 | gHEV       | FW     | 265,554 | 0.415  | 78.417 | 90.883 |
| S13 | gHEV       | RV     | 206,668 | 0.391  | 81.062 | 92.081 |
| S14 | gHEV       | FW     | 248,738 | 2.094  | 48.906 | 63.858 |
| S14 | gHEV       | RV     | 194,750 | 1.931  | 52.105 | 66.400 |
| S15 | gHEV       | FW     | 275,257 | 1.149  | 70.070 | 83.153 |
| S15 | gHEV       | RV     | 223,492 | 1.100  | 72.495 | 84.654 |
| S16 | gHEV       | FW     | 278,336 | 0.190  | 81.824 | 92.865 |
| S16 | gHEV       | RV     | 227,619 | 0.194  | 83.477 | 93.237 |
| S17 | gHEV       | FW     | 304,874 | 0.293  | 73.428 | 86.347 |
| S17 | gHEV       | RV     | 239,837 | 0.289  | 75.126 | 87.060 |
| S18 | gHEV       | FW     | 75,673  | 0.214  | 89.954 | 96.136 |
| S18 | gHEV       | RV     | 59,128  | 0.203  | 91.009 | 96.470 |
| S19 | gHEV       | FW     | 73,326  | 0.274  | 82.694 | 90.750 |
| S19 | gHEV       | RV     | 58,260  | 0.283  | 84.301 | 91.794 |

Table S2: Total reads per amplicon and strand, frequency of the master haplotype, fraction of reads for singletons, and fraction of reads for haplotypes supported by up to 5 reads. Frequency and fractions expressed as %.

| ID  | Virus      | Reads  | Singl  | UnqsSingl | AllUnqs |
|-----|------------|--------|--------|-----------|---------|
| S01 | CoV-HKU1   | 562715 | 1.634  | 1.533     | 1.668   |
| S02 | CoV-NL63   | 419401 | 3.393  | 3.106     | 3.458   |
| S03 | CoV-OC43   | 725128 | 4.055  | 3.516     | 4.107   |
| S04 | EV-A71     | 682441 | 5.381  | 4.391     | 5.409   |
| S05 | HCV-1B     | 564616 | 9.153  | 7.984     | 9.788   |
| S06 | HMPV-B     | 720156 | 4.392  | 3.809     | 4.581   |
| S07 | RSV-A      | 553091 | 2.069  | 1.883     | 2.136   |
| S08 | RSV-B      | 688452 | 1.675  | 1.563     | 1.688   |
| S09 | SARS-CoV-2 | 535593 | 1.518  | 1.409     | 1.536   |
| S10 | gHEV       | 565083 | 38.631 | 35.237    | 41.983  |
| S11 | gHEV       | 537480 | 41.473 | 38.364    | 45.004  |
| S12 | gHEV       | 436196 | 30.958 | 28.191    | 35.540  |
| S13 | gHEV       | 472222 | 79.575 | 76.801    | 83.887  |
| S14 | gHEV       | 443488 | 50.311 | 46.566    | 53.297  |
| S15 | gHEV       | 498749 | 71.157 | 67.797    | 74.099  |
| S16 | gHEV       | 505955 | 82.568 | 79.844    | 85.953  |
| S17 | gHEV       | 544711 | 74.175 | 70.937    | 77.806  |
| S18 | gHEV       | 134801 | 90.417 | 88.229    | 90.790  |
| S19 | gHEV       | 131586 | 83.406 | 80.585    | 84.277  |

Table S3: Total reads per amplicon, and fractions for singletons, singletons unique to one strand, and reads of haplotypes unique to one strand. Fractions expressed as percentages.

| ID             | Strand | Master | Emerging | 0.1–1% | < 0.1% |
|----------------|--------|--------|----------|--------|--------|
| CoV-HKU1.S01   | FW     | 82.531 | 0.000    | 1.594  | 15.875 |
| CoV-HKU1.S01   | RV     | 82.826 | 0.000    | 1.726  | 15.448 |
| CoV-NL63.S02   | FW     | 75.754 | 0.000    | 4.717  | 19.529 |
| CoV-NL63.S02   | RV     | 73.846 | 0.000    | 5.366  | 20.788 |
| CoV-OC43.S03   | FW     | 70.946 | 0.000    | 6.041  | 23.013 |
| CoV-OC43.S03   | RV     | 70.393 | 0.000    | 6.276  | 23.331 |
| EV-A71.S04     | FW     | 63.891 | 0.000    | 13.629 | 22.479 |
| EV-A71.S04     | RV     | 63.577 | 0.000    | 14.155 | 22.268 |
| HCV-1B.S05     | FW     | 31.413 | 22.364   | 10.541 | 35.682 |
| HCV-1B.S05     | RV     | 30.749 | 21.892   | 11.571 | 35.787 |
| HMPV-B.S06     | FW     | 66.945 | 0.000    | 7.520  | 25.535 |
| HMPV-B.S06     | RV     | 68.835 | 0.000    | 6.489  | 24.676 |
| RSV-A.S07      | FW     | 79.638 | 0.000    | 3.103  | 17.259 |
| RSV-A.S07      | RV     | 79.846 | 0.000    | 2.990  | 17.164 |
| RSV-B.S08      | FW     | 81.978 | 0.000    | 0.927  | 17.095 |
| RSV-B.S08      | RV     | 82.235 | 0.000    | 0.969  | 16.796 |
| SARS-CoV-2.S09 | FW     | 82.432 | 0.000    | 2.200  | 15.368 |
| SARS-CoV-2.S09 | RV     | 82.228 | 0.000    | 2.125  | 15.647 |
| gHEV.S10       | FW     | 8.163  | 1.303    | 12.462 | 78.071 |
| gHEV.S10       | RV     | 7.921  | 1.364    | 12.019 | 78.696 |
| gHEV.S11       | FW     | 8.817  | 2.639    | 9.900  | 78.644 |
| gHEV.S11       | RV     | 8.695  | 2.773    | 9.415  | 79.116 |
| gHEV.S12       | FW     | 5.182  | 12.111   | 15.102 | 67.606 |
| gHEV.S12       | RV     | 5.118  | 12.102   | 15.063 | 67.718 |
| gHEV.S13       | FW     | 0.415  | 0.000    | 0.900  | 98.685 |
| gHEV.S13       | RV     | 0.391  | 0.000    | 0.786  | 98.822 |
| gHEV.S14       | FW     | 2.094  | 1.056    | 10.944 | 85.907 |
| gHEV.S14       | RV     | 1.931  | 0.000    | 12.383 | 85.686 |
| gHEV.S15       | FW     | 1.149  | 0.000    | 1.545  | 97.306 |
| gHEV.S15       | RV     | 1.100  | 0.000    | 1.519  | 97.381 |
| gHEV.S16       | FW     | 0.190  | 0.000    | 0.626  | 99.184 |
| gHEV.S16       | RV     | 0.194  | 0.000    | 0.640  | 99.166 |
| gHEV.S17       | FW     | 0.293  | 0.000    | 2.715  | 96.992 |
| gHEV.S17       | RV     | 0.289  | 0.000    | 2.384  | 97.327 |
| gHEV.S18       | FW     | 0.214  | 0.000    | 0.620  | 99.166 |
| gHEV.S18       | RV     | 0.203  | 0.000    | 0.641  | 99.156 |
| gHEV.S19       | FW     | 0.274  | 0.000    | 3.018  | 96.708 |
| gHEV.S19       | RV     | 0.283  | 0.000    | 2.403  | 97.314 |

Table S4: Quasispecies fitness fractions for each amplicon and strand, raw values. Master frequency, emerging as the fraction of reads for haplotypes above 1% and below the master, fraction of reads for haplotypes at frequencies between 0.1 and 1%, and fraction of reads for haplotypes below 0.1%. Frequency and fractions expressed as percentages.

| ID             | Strand | ${}^0D$ | ${}^1D$   | ${}^2D$  | ${}^3D$ | ${}^\infty D$ |
|----------------|--------|---------|-----------|----------|---------|---------------|
| CoV-HKU1.S01   | FW     | 5799    | 5.25      | 1.47     | 1.33    | 1.21          |
| CoV-HKU1.S01   | RV     | 5976    | 5.14      | 1.46     | 1.33    | 1.21          |
| CoV-NL63.S02   | FW     | 8205    | 9.61      | 1.74     | 1.52    | 1.32          |
| CoV-NL63.S02   | RV     | 9173    | 11.48     | 1.83     | 1.58    | 1.35          |
| CoV-OC43.S03   | FW     | 17293   | 15.02     | 1.99     | 1.67    | 1.41          |
| CoV-OC43.S03   | RV     | 17309   | 15.70     | 2.02     | 1.69    | 1.42          |
| EV-A71.S04     | FW     | 22453   | 27.33     | 2.45     | 1.96    | 1.57          |
| EV-A71.S04     | RV     | 22797   | 28.37     | 2.47     | 1.97    | 1.57          |
| HCV-1B.S05     | FW     | 32262   | 130.91    | 7.01     | 5.00    | 3.18          |
| HCV-1B.S05     | RV     | 31232   | 141.63    | 7.32     | 5.16    | 3.25          |
| HMPV-B.S06     | FW     | 20466   | 20.95     | 2.23     | 1.83    | 1.49          |
| HMPV-B.S06     | RV     | 17913   | 17.29     | 2.11     | 1.75    | 1.45          |
| RSV-A.S07      | FW     | 7134    | 6.59      | 1.58     | 1.41    | 1.26          |
| RSV-A.S07      | RV     | 7180    | 6.46      | 1.57     | 1.40    | 1.25          |
| RSV-B.S08      | FW     | 7354    | 5.52      | 1.49     | 1.35    | 1.22          |
| RSV-B.S08      | RV     | 6847    | 5.37      | 1.48     | 1.34    | 1.22          |
| SARS-CoV-2.S09 | FW     | 5101    | 5.09      | 1.47     | 1.34    | 1.21          |
| SARS-CoV-2.S09 | RV     | 5378    | 5.19      | 1.48     | 1.34    | 1.22          |
| gHEV.S10       | FW     | 135372  | 17182.36  | 137.10   | 42.71   | 12.25         |
| gHEV.S10       | RV     | 120512  | 16845.38  | 144.75   | 44.65   | 12.63         |
| gHEV.S11       | FW     | 137986  | 17288.94  | 116.44   | 37.99   | 11.34         |
| gHEV.S11       | RV     | 118804  | 16544.89  | 119.59   | 38.79   | 11.50         |
| gHEV.S12       | FW     | 87365   | 7322.95   | 175.42   | 71.36   | 19.30         |
| gHEV.S12       | RV     | 74691   | 7276.66   | 180.70   | 72.86   | 19.54         |
| gHEV.S13       | FW     | 223705  | 171133.00 | 20304.17 | 3050.23 | 241.19        |
| gHEV.S13       | RV     | 178141  | 141520.90 | 21099.08 | 3243.87 | 255.46        |
| gHEV.S14       | FW     | 139407  | 37824.52  | 1027.08  | 287.49  | 47.76         |
| gHEV.S14       | RV     | 114751  | 35234.88  | 1149.31  | 320.07  | 51.78         |
| gHEV.S15       | FW     | 209683  | 123361.70 | 4933.76  | 780.53  | 87.05         |
| gHEV.S15       | RV     | 174583  | 108243.20 | 5156.54  | 819.08  | 90.92         |
| gHEV.S16       | FW     | 242079  | 198571.20 | 41197.29 | 6478.57 | 526.16        |
| gHEV.S16       | RV     | 200428  | 167029.70 | 39280.69 | 6284.56 | 516.14        |
| gHEV.S17       | FW     | 242171  | 156931.40 | 13670.95 | 3238.91 | 341.02        |
| gHEV.S17       | RV     | 193412  | 128034.70 | 12975.67 | 3156.40 | 346.09        |
| gHEV.S18       | FW     | 70195   | 63564.13  | 29435.46 | 6141.02 | 467.12        |
| gHEV.S18       | RV     | 55289   | 50685.19  | 26348.03 | 5936.40 | 492.73        |
| gHEV.S19       | FW     | 63350   | 48778.72  | 11344.69 | 3100.79 | 364.81        |
| gHEV.S19       | RV     | 51094   | 40722.29  | 11740.75 | 3295.52 | 353.09        |

Table S5: Hill numbers for each amplicon and strand at  $q=0,1,2,3$  and infinity. Raw values.

| ID             | Strand | ${}^1E$ | ${}^2E$ | eInf   |
|----------------|--------|---------|---------|--------|
| CoV-HKU1.S01   | FW     | 0.0009  | 0.0003  | 0.0222 |
| CoV-HKU1.S01   | RV     | 0.0009  | 0.0002  | 0.0217 |
| CoV-NL63.S02   | FW     | 0.0012  | 0.0002  | 0.0308 |
| CoV-NL63.S02   | RV     | 0.0013  | 0.0002  | 0.0332 |
| CoV-OC43.S03   | FW     | 0.0009  | 0.0001  | 0.0352 |
| CoV-OC43.S03   | RV     | 0.0009  | 0.0001  | 0.0360 |
| EV-A71.S04     | FW     | 0.0012  | 0.0001  | 0.0447 |
| EV-A71.S04     | RV     | 0.0012  | 0.0001  | 0.0451 |
| HCV-1B.S05     | FW     | 0.0041  | 0.0002  | 0.1115 |
| HCV-1B.S05     | RV     | 0.0045  | 0.0002  | 0.1140 |
| HMPV-B.S06     | FW     | 0.0010  | 0.0001  | 0.0404 |
| HMPV-B.S06     | RV     | 0.0010  | 0.0001  | 0.0381 |
| RSV-A.S07      | FW     | 0.0009  | 0.0002  | 0.0257 |
| RSV-A.S07      | RV     | 0.0009  | 0.0002  | 0.0253 |
| RSV-B.S08      | FW     | 0.0008  | 0.0002  | 0.0223 |
| RSV-B.S08      | RV     | 0.0008  | 0.0002  | 0.0221 |
| SARS-CoV-2.S09 | FW     | 0.0010  | 0.0003  | 0.0226 |
| SARS-CoV-2.S09 | RV     | 0.0010  | 0.0003  | 0.0228 |
| gHEV.S10       | FW     | 0.1269  | 0.0010  | 0.2121 |
| gHEV.S10       | RV     | 0.1398  | 0.0012  | 0.2167 |
| gHEV.S11       | FW     | 0.1253  | 0.0008  | 0.2052 |
| gHEV.S11       | RV     | 0.1393  | 0.0010  | 0.2090 |
| gHEV.S12       | FW     | 0.0838  | 0.0020  | 0.2602 |
| gHEV.S12       | RV     | 0.0974  | 0.0024  | 0.2649 |
| gHEV.S13       | FW     | 0.7650  | 0.0908  | 0.4453 |
| gHEV.S13       | RV     | 0.7944  | 0.1184  | 0.4585 |
| gHEV.S14       | FW     | 0.2713  | 0.0074  | 0.3264 |
| gHEV.S14       | RV     | 0.3071  | 0.0100  | 0.3388 |
| gHEV.S15       | FW     | 0.5883  | 0.0235  | 0.3645 |
| gHEV.S15       | RV     | 0.6200  | 0.0295  | 0.3737 |
| gHEV.S16       | FW     | 0.8203  | 0.1702  | 0.5054 |
| gHEV.S16       | RV     | 0.8334  | 0.1960  | 0.5117 |
| gHEV.S17       | FW     | 0.6480  | 0.0565  | 0.4704 |
| gHEV.S17       | RV     | 0.6620  | 0.0671  | 0.4803 |
| gHEV.S18       | FW     | 0.9055  | 0.4193  | 0.5508 |
| gHEV.S18       | RV     | 0.9167  | 0.4766  | 0.5677 |
| gHEV.S19       | FW     | 0.7700  | 0.1791  | 0.5336 |
| gHEV.S19       | RV     | 0.7970  | 0.2298  | 0.5411 |

Table S6: Evenness for each amplicon and strand, at  $q = 1$  and  $2$ ,  ${}^qE = {}^qD/{}^0D$ , and  $eInf = \log({}^\infty D)/\log({}^0 D)$ . Raw values.



|         | Flat   | Other    |
|---------|--------|----------|
| Min.    | 0.0838 | 0.000751 |
| 1st Qu. | 0.1400 | 0.000901 |
| Median  | 0.6340 | 0.000966 |
| Mean    | 0.5210 | 0.001350 |
| 3rd Qu. | 0.7950 | 0.001210 |
| Max.    | 0.9170 | 0.004530 |

Table S7: Summary values of Hill evenness at  $q = 1$ ,  ${}^1E = {}^1D/{}^0D$ , for flat-like versus regular quasispecies.

|         | Flat  | Other  |
|---------|-------|--------|
| Min.    | 0.205 | 0.0217 |
| 1st Qu. | 0.264 | 0.0227 |
| Median  | 0.409 | 0.0320 |
| Mean    | 0.392 | 0.0397 |
| 3rd Qu. | 0.507 | 0.0399 |
| Max.    | 0.568 | 0.1140 |

Table S8: Summary values of evenness at  $q$  infinity,  $eInf = \log({}^\infty D)/\log({}^0 D)$ , for flat-like versus regular quasispecies.

| ID             | Strand | Top25  | Ratio  |
|----------------|--------|--------|--------|
| CoV-HKU1.S01   | FW     | 85.207 | 1.032  |
| CoV-HKU1.S01   | RV     | 85.528 | 1.033  |
| CoV-NL63.S02   | FW     | 79.002 | 1.043  |
| CoV-NL63.S02   | RV     | 77.230 | 1.046  |
| CoV-OC43.S03   | FW     | 74.356 | 1.048  |
| CoV-OC43.S03   | RV     | 73.995 | 1.051  |
| EV-A71.S04     | FW     | 68.690 | 1.075  |
| EV-A71.S04     | RV     | 68.378 | 1.076  |
| HCV-1B.S05     | FW     | 60.026 | 1.911  |
| HCV-1B.S05     | RV     | 59.451 | 1.933  |
| HMPV-B.S06     | FW     | 72.480 | 1.083  |
| HMPV-B.S06     | RV     | 74.398 | 1.081  |
| RSV-A.S07      | FW     | 83.122 | 1.044  |
| RSV-A.S07      | RV     | 83.303 | 1.043  |
| RSV-B.S08      | FW     | 84.349 | 1.029  |
| RSV-B.S08      | RV     | 84.524 | 1.028  |
| SARS-CoV-2.S09 | FW     | 85.721 | 1.040  |
| SARS-CoV-2.S09 | RV     | 85.406 | 1.039  |
| gHEV.S10       | FW     | 16.670 | 2.042  |
| gHEV.S10       | RV     | 16.414 | 2.072  |
| gHEV.S11       | FW     | 19.128 | 2.169  |
| gHEV.S11       | RV     | 18.801 | 2.162  |
| gHEV.S12       | FW     | 25.118 | 4.848  |
| gHEV.S12       | RV     | 24.592 | 4.805  |
| gHEV.S13       | FW     | 2.177  | 5.250  |
| gHEV.S13       | RV     | 2.147  | 5.486  |
| gHEV.S14       | FW     | 10.932 | 5.221  |
| gHEV.S14       | RV     | 10.317 | 5.342  |
| gHEV.S15       | FW     | 3.911  | 3.404  |
| gHEV.S15       | RV     | 3.761  | 3.420  |
| gHEV.S16       | FW     | 1.541  | 8.106  |
| gHEV.S16       | RV     | 1.502  | 7.751  |
| gHEV.S17       | FW     | 3.384  | 11.539 |
| gHEV.S17       | RV     | 3.327  | 11.514 |
| gHEV.S18       | FW     | 1.530  | 7.148  |
| gHEV.S18       | RV     | 1.497  | 7.375  |
| gHEV.S19       | FW     | 3.579  | 13.055 |
| gHEV.S19       | RV     | 3.249  | 11.473 |

Table S9: Fraction of reads of the 25 most abundant haplotypes in each amplicon and strand, expressed as percentage, and ratio of this fraction to the corresponding master frequency.

|         | Flat   | Other |
|---------|--------|-------|
| Min.    | 2.042  | 1.028 |
| 1st Qu. | 3.416  | 1.039 |
| Median  | 5.296  | 1.045 |
| Mean    | 6.209  | 1.146 |
| 3rd Qu. | 7.840  | 1.076 |
| Max.    | 13.055 | 1.933 |

Table S10: Summary values of the ratio of top 25 haplotypes versus master haplotype.

| ID             | FW    | RV    |
|----------------|-------|-------|
| CoV-HKU1.S01   | 0.181 | 0.179 |
| CoV-NL63.S02   | 0.275 | 0.297 |
| CoV-OC43.S03   | 0.332 | 0.339 |
| EV-A71.S04     | 0.441 | 0.448 |
| HCV-1B.S05     | 0.985 | 1.006 |
| HMPV-B.S06     | 0.388 | 0.359 |
| RSV-A.S07      | 0.213 | 0.210 |
| RSV-B.S08      | 0.198 | 0.194 |
| SARS-CoV-2.S09 | 0.158 | 0.162 |
| gHEV.S10       | 2.520 | 2.553 |
| gHEV.S11       | 2.420 | 2.459 |
| gHEV.S12       | 4.200 | 4.226 |
| gHEV.S13       | 5.490 | 5.542 |
| gHEV.S14       | 4.418 | 4.518 |
| gHEV.S15       | 5.669 | 5.765 |
| gHEV.S16       | 7.528 | 7.607 |
| gHEV.S17       | 6.753 | 6.821 |
| gHEV.S18       | 7.554 | 7.213 |
| gHEV.S19       | 6.709 | 6.847 |

Table S11: Average number of substitutions with respect to the master haplotype, per read, for each amplicon and strand. FW: forward strand, RV: reverse strand.

| ID       | Strand | q   | Raw    | 0.5    | 0.25  | 0.1   | 0.05  |
|----------|--------|-----|--------|--------|-------|-------|-------|
| gHEV.S16 | FW     | 0   | 242079 | 125377 | 64368 | 26432 | 13413 |
| gHEV.S16 | FW     | 1   | 198571 | 108815 | 58346 | 24956 | 12925 |
| gHEV.S16 | FW     | 2   | 41197  | 35870  | 28577 | 17704 | 10804 |
| gHEV.S16 | FW     | 3   | 6479   | 6443   | 6401  | 6156  | 5568  |
| gHEV.S16 | FW     | inf | 526    | 526    | 526   | 512   | 488   |
| gHEV.S16 | RV     | 0   | 200428 | 103381 | 52950 | 21702 | 11006 |
| gHEV.S16 | RV     | 1   | 167030 | 90825  | 48455 | 20619 | 10657 |
| gHEV.S16 | RV     | 2   | 39281  | 33481  | 25924 | 15394 | 9192  |
| gHEV.S16 | RV     | 3   | 6285   | 6246   | 6188  | 5868  | 5214  |
| gHEV.S16 | RV     | inf | 516    | 515    | 510   | 489   | 470   |
| gHEV.S17 | FW     | 0   | 242171 | 126825 | 65779 | 27321 | 13969 |
| gHEV.S17 | FW     | 1   | 156931 | 90668  | 51019 | 23090 | 12421 |
| gHEV.S17 | FW     | 2   | 13671  | 13083  | 12053 | 9757  | 7401  |
| gHEV.S17 | FW     | 3   | 3239   | 3226   | 3204  | 3134  | 3012  |
| gHEV.S17 | FW     | inf | 341    | 341    | 342   | 344   | 348   |
| gHEV.S17 | RV     | 0   | 193412 | 100853 | 52135 | 21586 | 11020 |
| gHEV.S17 | RV     | 1   | 128035 | 73346  | 41005 | 18458 | 9901  |
| gHEV.S17 | RV     | 2   | 12976  | 12321  | 11164 | 8760  | 6420  |
| gHEV.S17 | RV     | 3   | 3156   | 3146   | 3113  | 3039  | 2870  |
| gHEV.S17 | RV     | inf | 346    | 347    | 347   | 348   | 342   |

Table S12: Hill numbers of different orders  $q$ ,  ${}^qD$ , as observed (raw) and as computed at different subsampling fractions by rarefaction.

| ID       | Strand | Subsz | ${}^1E$ | ${}^2E$ | ${}^3E$ | ${}^\infty E$ | eInf   |
|----------|--------|-------|---------|---------|---------|---------------|--------|
| gHEV.S16 | FW     | Raw   | 0.8203  | 0.1702  | 0.0268  | 0.0022        | 0.5054 |
| gHEV.S16 | FW     | 0.5   | 0.8679  | 0.2861  | 0.0514  | 0.0042        | 0.5337 |
| gHEV.S16 | FW     | 0.25  | 0.9065  | 0.444   | 0.0994  | 0.0082        | 0.5659 |
| gHEV.S16 | FW     | 0.1   | 0.9442  | 0.6698  | 0.2329  | 0.0194        | 0.6127 |
| gHEV.S16 | FW     | 0.05  | 0.9636  | 0.8055  | 0.4151  | 0.0364        | 0.6514 |
| gHEV.S16 | RV     | Raw   | 0.8334  | 0.196   | 0.0314  | 0.0026        | 0.5116 |
| gHEV.S16 | RV     | 0.5   | 0.8785  | 0.3239  | 0.0604  | 0.005         | 0.5408 |
| gHEV.S16 | RV     | 0.25  | 0.9151  | 0.4896  | 0.1169  | 0.0096        | 0.5731 |
| gHEV.S16 | RV     | 0.1   | 0.9501  | 0.7093  | 0.2704  | 0.0226        | 0.6202 |
| gHEV.S16 | RV     | 0.05  | 0.9683  | 0.8352  | 0.4737  | 0.0427        | 0.6612 |
| gHEV.S17 | FW     | Raw   | 0.648   | 0.0565  | 0.0134  | 0.0014        | 0.4704 |
| gHEV.S17 | FW     | 0.5   | 0.7149  | 0.1032  | 0.0254  | 0.0027        | 0.4963 |
| gHEV.S17 | FW     | 0.25  | 0.7756  | 0.1832  | 0.0487  | 0.0052        | 0.5259 |
| gHEV.S17 | FW     | 0.1   | 0.8451  | 0.3571  | 0.1147  | 0.0126        | 0.5717 |
| gHEV.S17 | FW     | 0.05  | 0.8892  | 0.5298  | 0.2156  | 0.0249        | 0.6131 |
| gHEV.S17 | RV     | Raw   | 0.662   | 0.0671  | 0.0163  | 0.0018        | 0.4803 |
| gHEV.S17 | RV     | 0.5   | 0.7273  | 0.1222  | 0.0312  | 0.0034        | 0.5076 |
| gHEV.S17 | RV     | 0.25  | 0.7865  | 0.2141  | 0.0597  | 0.0066        | 0.5384 |
| gHEV.S17 | RV     | 0.1   | 0.8551  | 0.4058  | 0.1408  | 0.0161        | 0.5863 |
| gHEV.S17 | RV     | 0.05  | 0.8985  | 0.5826  | 0.2604  | 0.0311        | 0.627  |

Table S13: Evenness of different orders  $q$ ,  ${}^qE = {}^qD/{}^0D$ , and  $eInf = \log({}^\infty D)/\log({}^0D)$ , as observed (raw) and as computed at different subsampling fractions by rarefaction.

| ID             | Strand | Master | Emerging | 0.1 – 1% | < 0.1% |
|----------------|--------|--------|----------|----------|--------|
| CoV-HKU1.S01   | FW     | 82.532 | 0.000    | 1.689    | 15.791 |
| CoV-HKU1.S01   | RV     | 82.826 | 0.000    | 1.717    | 15.467 |
| CoV-NL63.S02   | FW     | 75.754 | 0.000    | 4.637    | 19.589 |
| CoV-NL63.S02   | RV     | 73.846 | 0.000    | 5.459    | 20.704 |
| CoV-OC43.S03   | FW     | 70.943 | 0.000    | 5.992    | 23.073 |
| CoV-OC43.S03   | RV     | 70.384 | 0.000    | 6.386    | 23.229 |
| EV-A71.S04     | FW     | 63.898 | 0.000    | 13.693   | 22.407 |
| EV-A71.S04     | RV     | 63.577 | 0.000    | 14.016   | 22.411 |
| HCV-1B.S05     | FW     | 31.409 | 22.369   | 10.475   | 35.747 |
| HCV-1B.S05     | RV     | 30.747 | 21.891   | 11.472   | 35.889 |
| HMPV-B.S06     | FW     | 66.941 | 0.000    | 7.636    | 25.412 |
| HMPV-B.S06     | RV     | 68.837 | 0.000    | 6.504    | 24.652 |
| RSV-A.S07      | FW     | 79.639 | 0.000    | 3.039    | 17.305 |
| RSV-A.S07      | RV     | 79.846 | 0.000    | 2.876    | 17.295 |
| RSV-B.S08      | FW     | 81.977 | 0.000    | 1.018    | 17.029 |
| RSV-B.S08      | RV     | 82.230 | 0.000    | 0.964    | 16.837 |
| SARS-CoV-2.S09 | FW     | 82.435 | 0.000    | 2.292    | 15.288 |
| SARS-CoV-2.S09 | RV     | 82.225 | 0.000    | 2.125    | 15.650 |
| gHEV.S10       | FW     | 8.164  | 1.305    | 12.358   | 78.177 |
| gHEV.S10       | RV     | 7.921  | 1.364    | 12.035   | 78.674 |
| gHEV.S11       | FW     | 8.818  | 2.639    | 9.878    | 78.661 |
| gHEV.S11       | RV     | 8.695  | 2.772    | 9.364    | 79.168 |
| gHEV.S12       | FW     | 5.183  | 12.110   | 15.040   | 67.658 |
| gHEV.S12       | RV     | 5.118  | 12.102   | 15.063   | 67.718 |
| gHEV.S13       | FW     | 0.415  | 0.000    | 0.901    | 98.684 |
| gHEV.S13       | RV     | 0.391  | 0.000    | 0.787    | 98.822 |
| gHEV.S14       | FW     | 2.094  | 1.055    | 10.996   | 85.852 |
| gHEV.S14       | RV     | 1.931  | 0.000    | 12.383   | 85.686 |
| gHEV.S15       | FW     | 1.149  | 0.000    | 1.550    | 97.298 |
| gHEV.S15       | RV     | 1.100  | 0.000    | 1.519    | 97.381 |
| gHEV.S16       | FW     | 0.190  | 0.000    | 0.627    | 99.183 |
| gHEV.S16       | RV     | 0.194  | 0.000    | 0.640    | 99.166 |
| gHEV.S17       | FW     | 0.293  | 0.000    | 2.643    | 97.064 |
| gHEV.S17       | RV     | 0.289  | 0.000    | 2.380    | 97.331 |

Table S14: Quasispecies Fitness Fractions rarefied to 194,000 reads. Expressed as percentages.

| ID             | Strand | ${}^0D$ | ${}^1D$   | ${}^2D$  | ${}^3D$ | ${}^\infty D$ |
|----------------|--------|---------|-----------|----------|---------|---------------|
| CoV-HKU1.S01   | FW     | 4440    | 5.21      | 1.47     | 1.33    | 1.21          |
| CoV-HKU1.S01   | RV     | 4435    | 5.10      | 1.46     | 1.33    | 1.21          |
| CoV-NL63.S02   | FW     | 7643    | 9.58      | 1.74     | 1.52    | 1.32          |
| CoV-NL63.S02   | RV     | 8688    | 11.45     | 1.83     | 1.58    | 1.35          |
| CoV-OC43.S03   | FW     | 10058   | 14.58     | 1.99     | 1.67    | 1.41          |
| CoV-OC43.S03   | RV     | 10298   | 15.26     | 2.02     | 1.69    | 1.42          |
| EV-A71.S04     | FW     | 14010   | 26.36     | 2.45     | 1.96    | 1.57          |
| EV-A71.S04     | RV     | 14417   | 27.35     | 2.47     | 1.97    | 1.57          |
| HCV-1B.S05     | FW     | 23048   | 125.40    | 7.01     | 5.00    | 3.18          |
| HCV-1B.S05     | RV     | 23756   | 136.42    | 7.32     | 5.16    | 3.25          |
| HMPV-B.S06     | FW     | 12167   | 20.24     | 2.23     | 1.83    | 1.49          |
| HMPV-B.S06     | RV     | 10856   | 16.80     | 2.11     | 1.75    | 1.45          |
| RSV-A.S07      | FW     | 5459    | 6.53      | 1.58     | 1.41    | 1.26          |
| RSV-A.S07      | RV     | 5370    | 6.41      | 1.57     | 1.40    | 1.25          |
| RSV-B.S08      | FW     | 4636    | 5.45      | 1.49     | 1.35    | 1.22          |
| RSV-B.S08      | RV     | 4413    | 5.31      | 1.48     | 1.34    | 1.22          |
| SARS-CoV-2.S09 | FW     | 4050    | 5.06      | 1.47     | 1.34    | 1.21          |
| SARS-CoV-2.S09 | RV     | 4153    | 5.16      | 1.48     | 1.34    | 1.22          |
| gHEV.S10       | FW     | 92129   | 14155.20  | 137.18   | 42.74   | 12.26         |
| gHEV.S10       | RV     | 93428   | 14776.49  | 144.66   | 44.65   | 12.62         |
| gHEV.S11       | FW     | 96334   | 14313.91  | 116.41   | 37.99   | 11.34         |
| gHEV.S11       | RV     | 97213   | 14863.67  | 119.57   | 38.78   | 11.50         |
| gHEV.S12       | FW     | 72717   | 6790.57   | 175.40   | 71.37   | 19.30         |
| gHEV.S12       | RV     | 74691   | 7276.66   | 180.70   | 72.86   | 19.54         |
| gHEV.S13       | FW     | 166874  | 131998.40 | 19768.23 | 3053.16 | 241.46        |
| gHEV.S13       | RV     | 167949  | 134246.49 | 20961.80 | 3244.49 | 255.43        |
| gHEV.S14       | FW     | 112186  | 33082.49  | 1025.97  | 287.43  | 47.75         |
| gHEV.S14       | RV     | 114751  | 35234.88  | 1149.31  | 320.07  | 51.78         |
| gHEV.S15       | FW     | 151854  | 95004.68  | 4901.27  | 780.43  | 87.05         |
| gHEV.S15       | RV     | 153152  | 97214.24  | 5133.48  | 818.22  | 90.89         |
| gHEV.S16       | FW     | 172188  | 145705.60 | 38765.73 | 6476.78 | 526.10        |
| gHEV.S16       | RV     | 172311  | 145525.42 | 38160.41 | 6279.67 | 516.30        |
| gHEV.S17       | FW     | 159118  | 110153.38 | 13327.44 | 3233.41 | 340.58        |
| gHEV.S17       | RV     | 158740  | 108329.62 | 12808.58 | 3152.04 | 345.43        |

Table S15: Hill numbers  ${}^qD$  at  $q = 1, 2, 3$ , and  $\infty$ , rarefied to 194,000 reads.

| ID             | Strand | $RLE_{0,1}$ | $RLE_{0,2}$ | $RLE_{0,3}$ | $RLE_{0,\infty}$ |
|----------------|--------|-------------|-------------|-------------|------------------|
| CoV-HKU1.S01   | FW     | 0.197       | 0.046       | 0.034       | 0.023            |
| CoV-HKU1.S01   | RV     | 0.194       | 0.045       | 0.034       | 0.022            |
| CoV-NL63.S02   | FW     | 0.253       | 0.062       | 0.047       | 0.031            |
| CoV-NL63.S02   | RV     | 0.269       | 0.067       | 0.050       | 0.033            |
| CoV-OC43.S03   | FW     | 0.291       | 0.074       | 0.056       | 0.037            |
| CoV-OC43.S03   | RV     | 0.295       | 0.076       | 0.057       | 0.038            |
| EV-A71.S04     | FW     | 0.343       | 0.094       | 0.070       | 0.047            |
| EV-A71.S04     | RV     | 0.346       | 0.095       | 0.071       | 0.047            |
| HCV-1B.S05     | FW     | 0.481       | 0.194       | 0.160       | 0.115            |
| HCV-1B.S05     | RV     | 0.488       | 0.198       | 0.163       | 0.117            |
| HMPV-B.S06     | FW     | 0.320       | 0.085       | 0.064       | 0.043            |
| HMPV-B.S06     | RV     | 0.304       | 0.080       | 0.060       | 0.040            |
| RSV-A.S07      | FW     | 0.218       | 0.053       | 0.040       | 0.026            |
| RSV-A.S07      | RV     | 0.216       | 0.052       | 0.039       | 0.026            |
| RSV-B.S08      | FW     | 0.201       | 0.047       | 0.035       | 0.024            |
| RSV-B.S08      | RV     | 0.199       | 0.047       | 0.035       | 0.023            |
| SARS-CoV-2.S09 | FW     | 0.195       | 0.046       | 0.035       | 0.023            |
| SARS-CoV-2.S09 | RV     | 0.197       | 0.047       | 0.035       | 0.023            |
| gHEV.S10       | FW     | 0.836       | 0.431       | 0.329       | 0.219            |
| gHEV.S10       | RV     | 0.839       | 0.435       | 0.332       | 0.222            |
| gHEV.S11       | FW     | 0.834       | 0.415       | 0.317       | 0.212            |
| gHEV.S11       | RV     | 0.836       | 0.417       | 0.319       | 0.213            |
| gHEV.S12       | FW     | 0.788       | 0.462       | 0.381       | 0.264            |
| gHEV.S12       | RV     | 0.792       | 0.463       | 0.382       | 0.265            |
| gHEV.S13       | FW     | 0.981       | 0.823       | 0.667       | 0.456            |
| gHEV.S13       | RV     | 0.981       | 0.827       | 0.672       | 0.461            |
| gHEV.S14       | FW     | 0.895       | 0.596       | 0.487       | 0.332            |
| gHEV.S14       | RV     | 0.899       | 0.605       | 0.495       | 0.339            |
| gHEV.S15       | FW     | 0.961       | 0.712       | 0.558       | 0.374            |
| gHEV.S15       | RV     | 0.962       | 0.716       | 0.562       | 0.378            |
| gHEV.S16       | FW     | 0.986       | 0.876       | 0.728       | 0.520            |
| gHEV.S16       | RV     | 0.986       | 0.875       | 0.725       | 0.518            |
| gHEV.S17       | FW     | 0.969       | 0.793       | 0.675       | 0.487            |
| gHEV.S17       | RV     | 0.968       | 0.790       | 0.673       | 0.488            |

Table S16: Relative logarithmic evenness,  $RLE_{0,q} = \log(^qD)/\log(^0D)$ , at  $q = 1, 2, 3$ , and  $\infty$ , rarefied to 194,000 reads.

### 3 Supplementary Figures

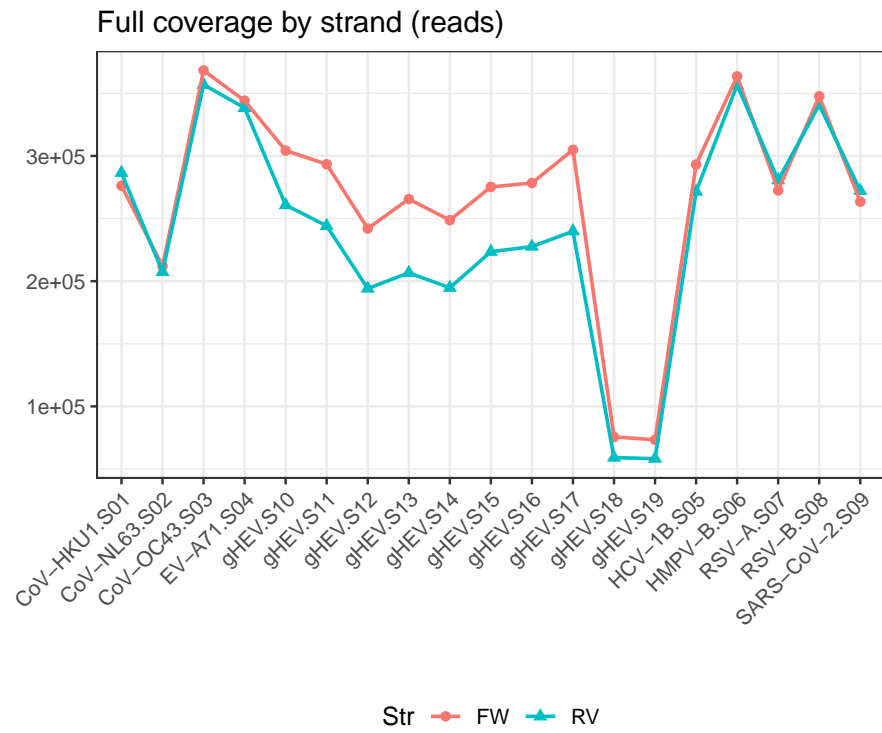

Figure S1: Coverage as number of reads per amplicon and strand. Orange: forward strand, turquoise: reverse strand.



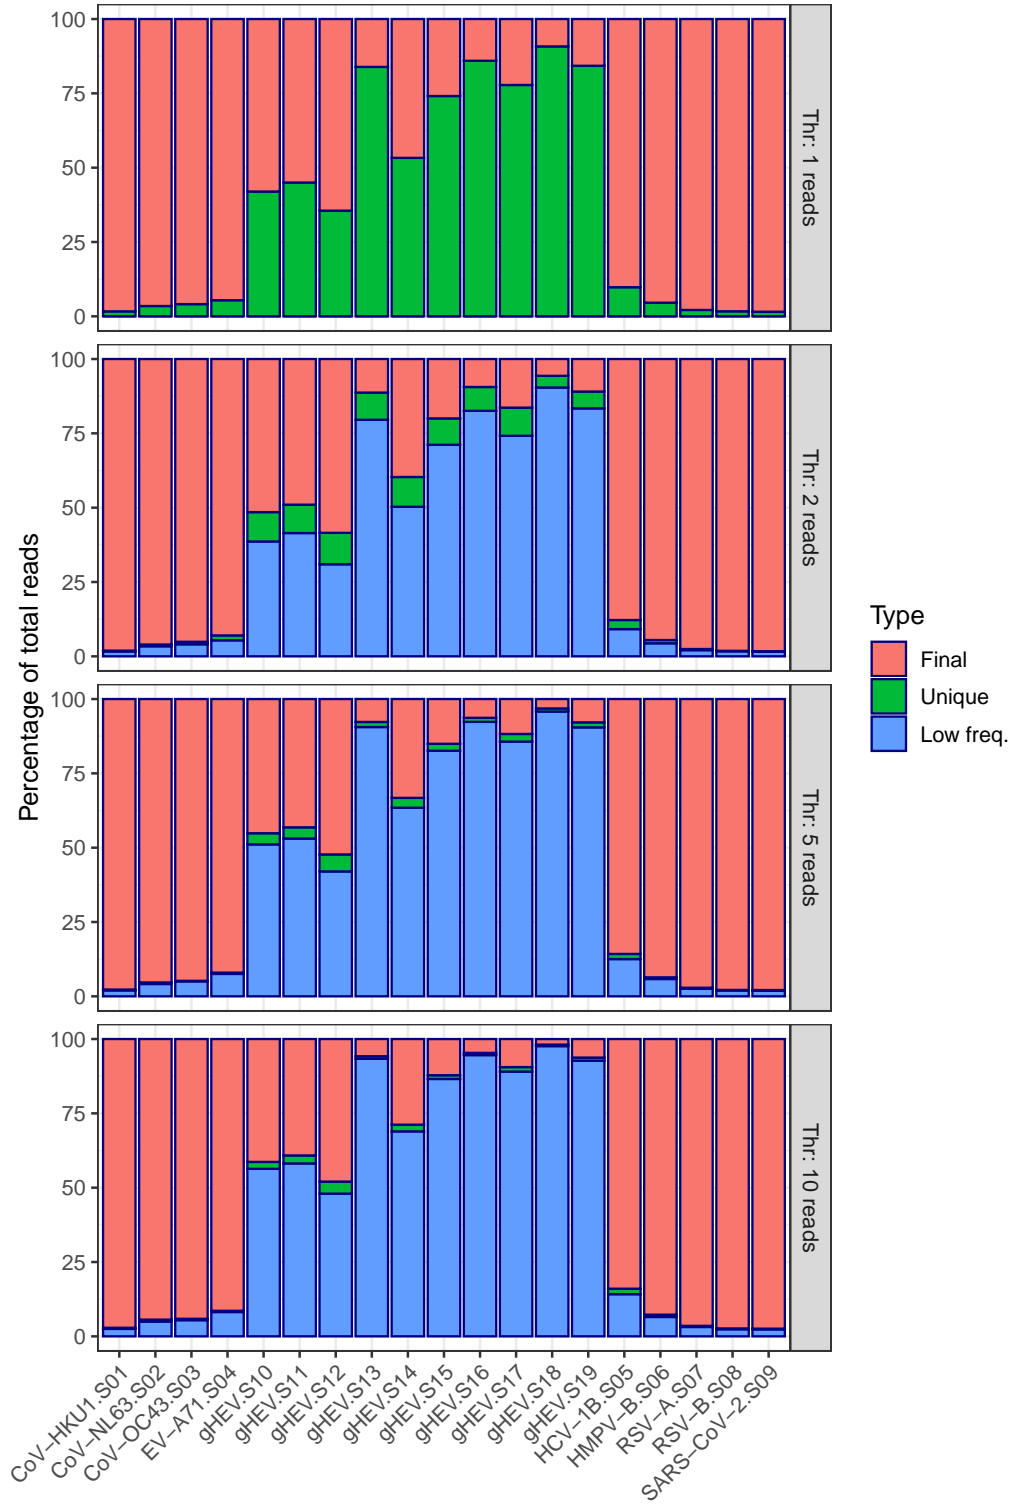

Figure S2: Results of previous abundance filter at a given number of reads per haplotype, followed by strand intersection. Final: fraction of reads resulting from the filter and intersection; Unique: fraction of reads corresponding to haplotypes passing the abundance filter but being unique to either strand; Low freq: fraction of reads corresponding to haplotypes not passing the abundance filter.

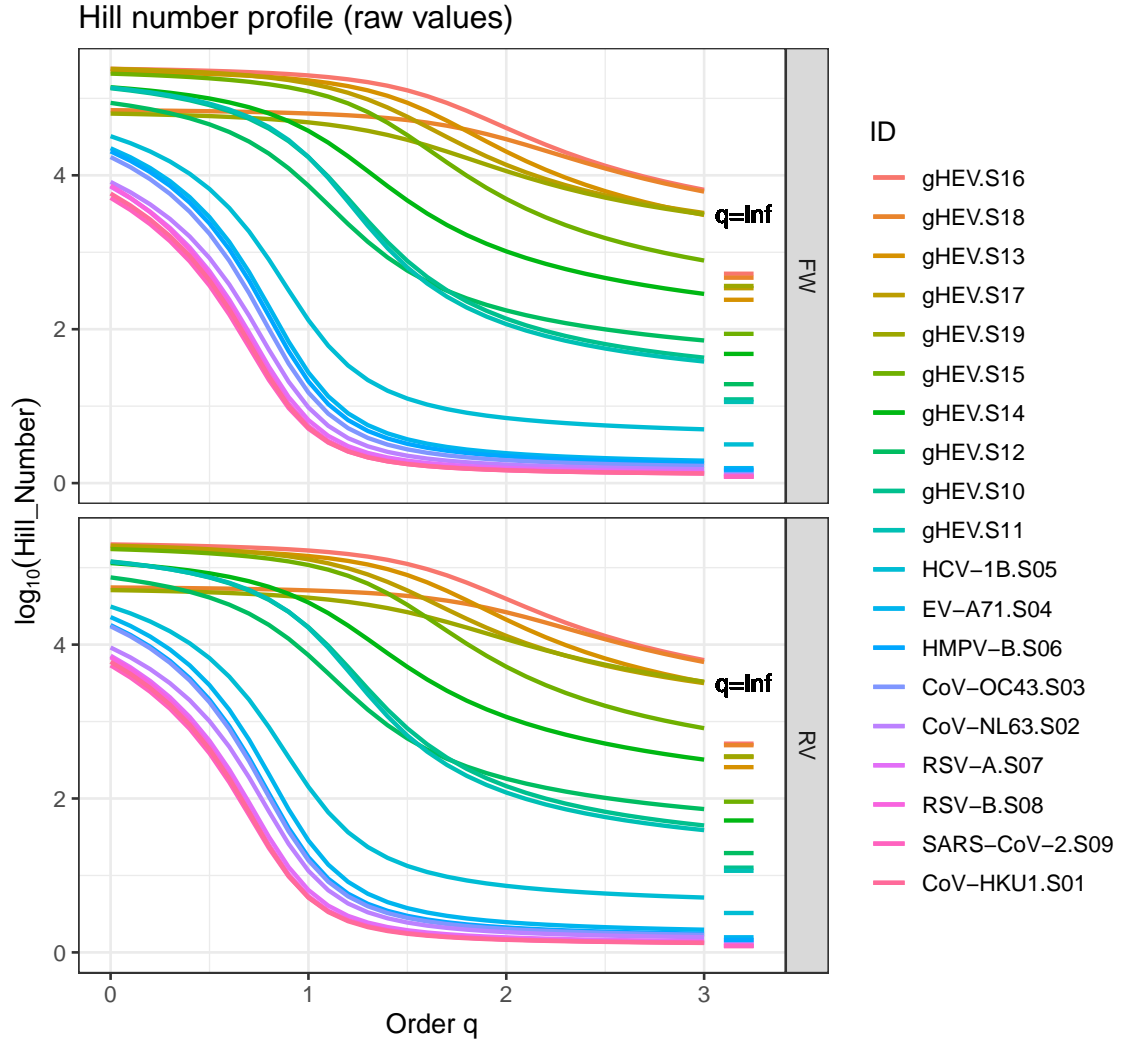

Figure S3: Hill numbers profile of flat-like vs. regular quasispecies. The legends are sorted in decreasing values at  $q=2$ .

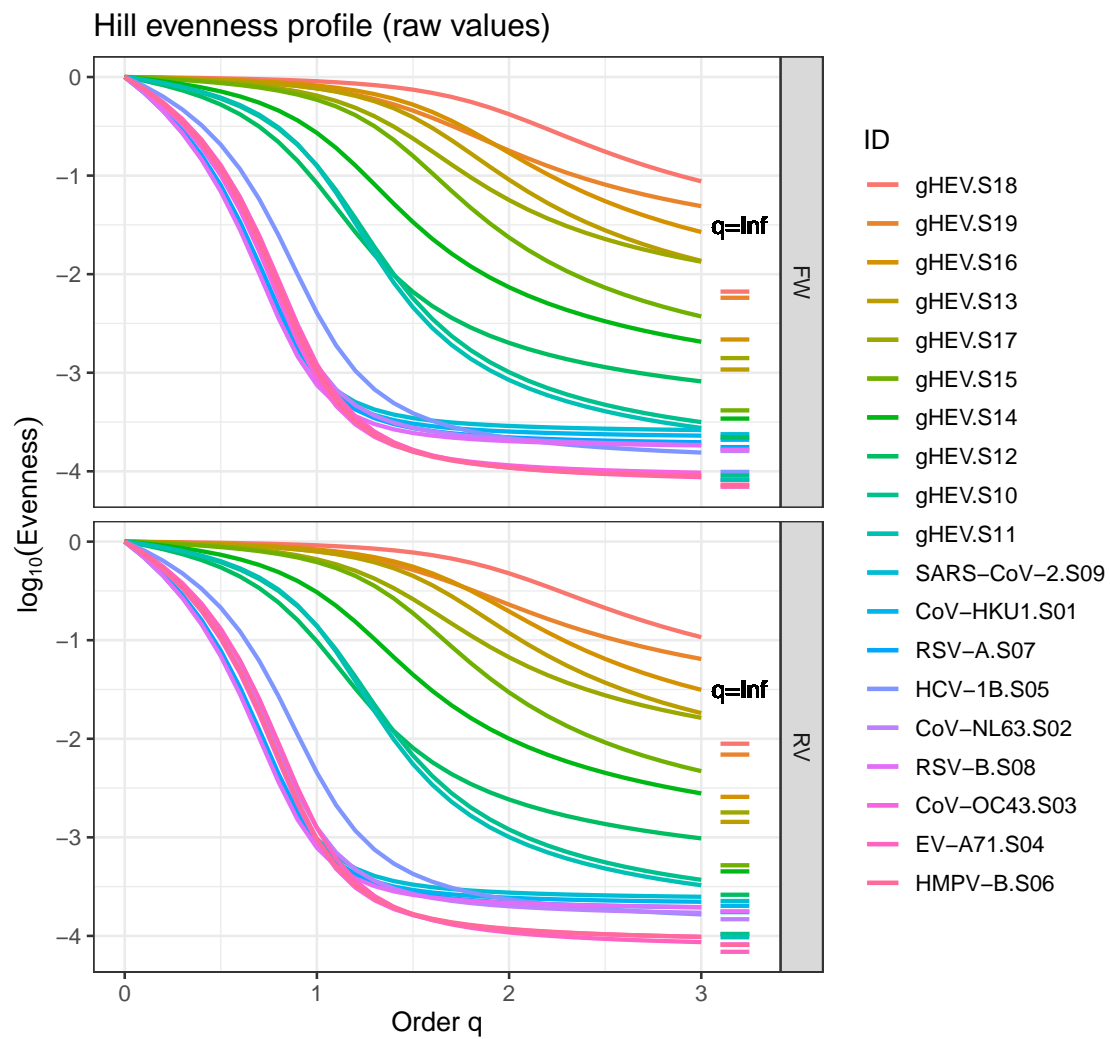

Figure S4: Hill evenness profile of flat-like vs. regular quasispecies. The legends are sorted in decreasing values at  $q=2$ .

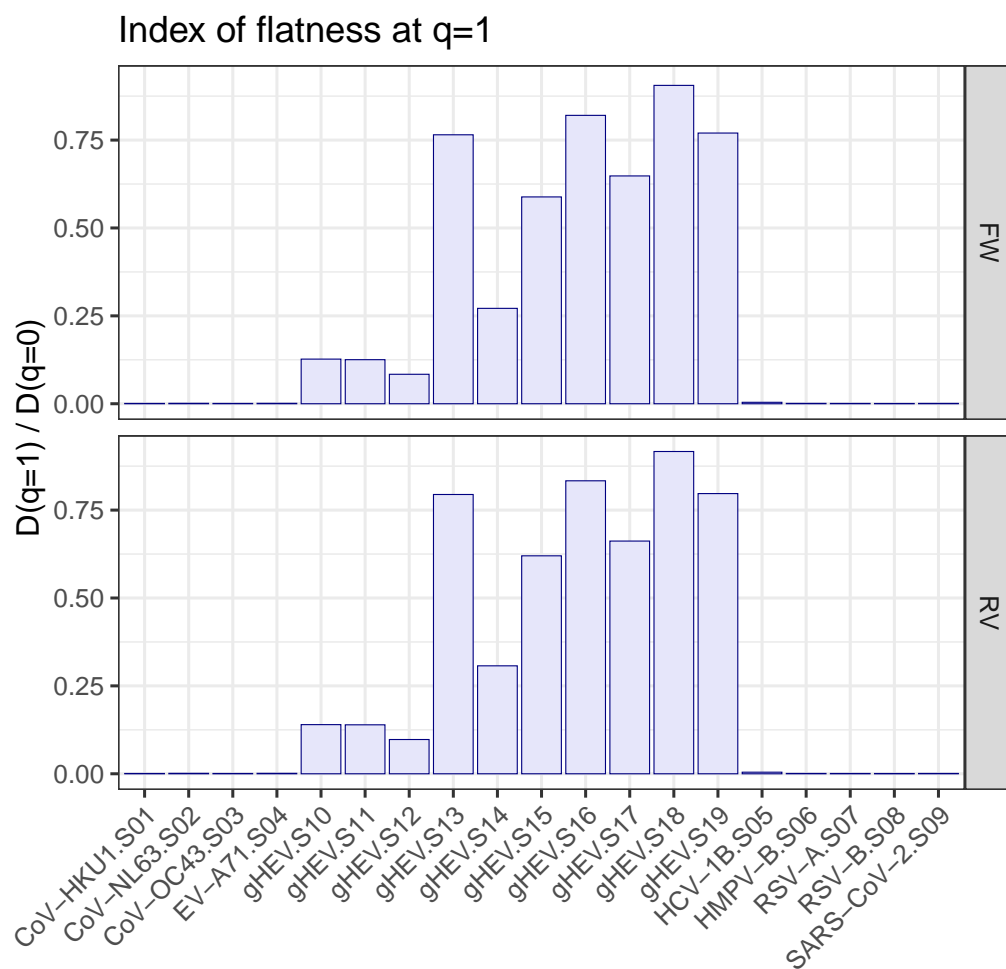

Figure S5: Index of evenness at  $q=1$ .

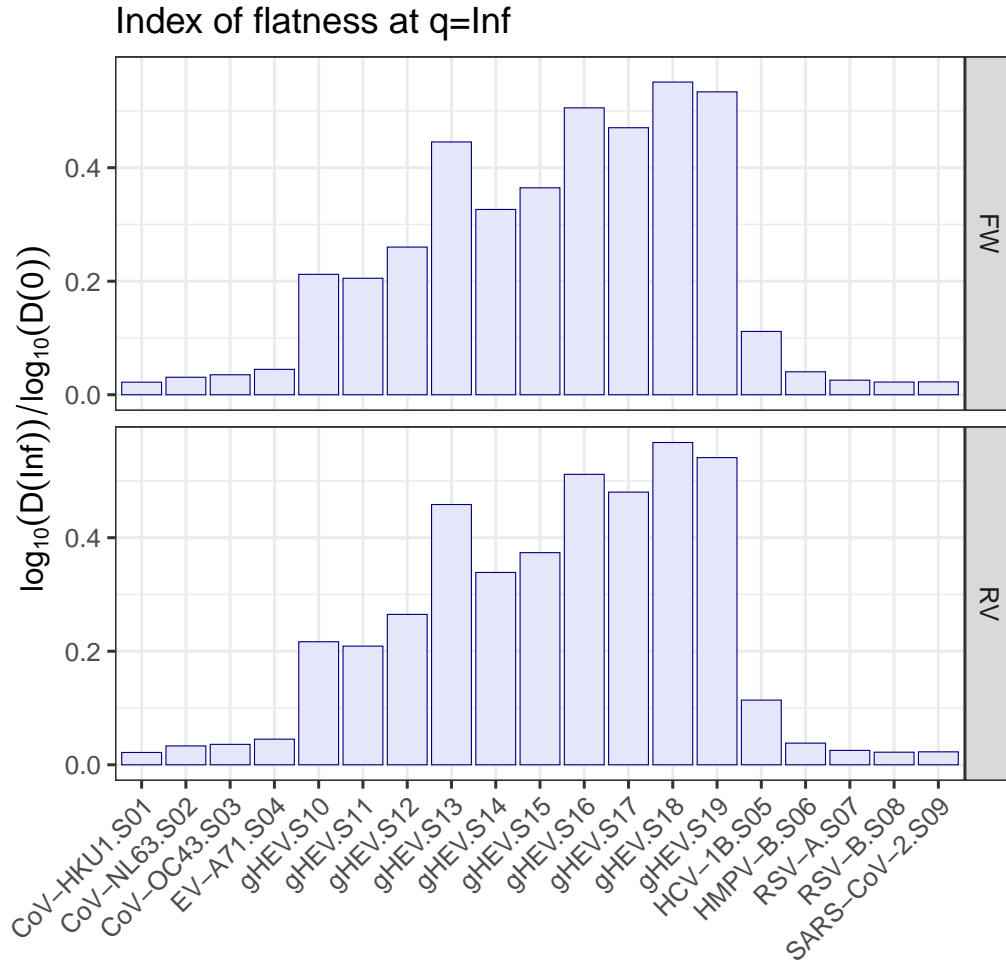

Figure S6: Index of evenness at  $q=\text{infinity}$ .

# Top 25 haplotypes

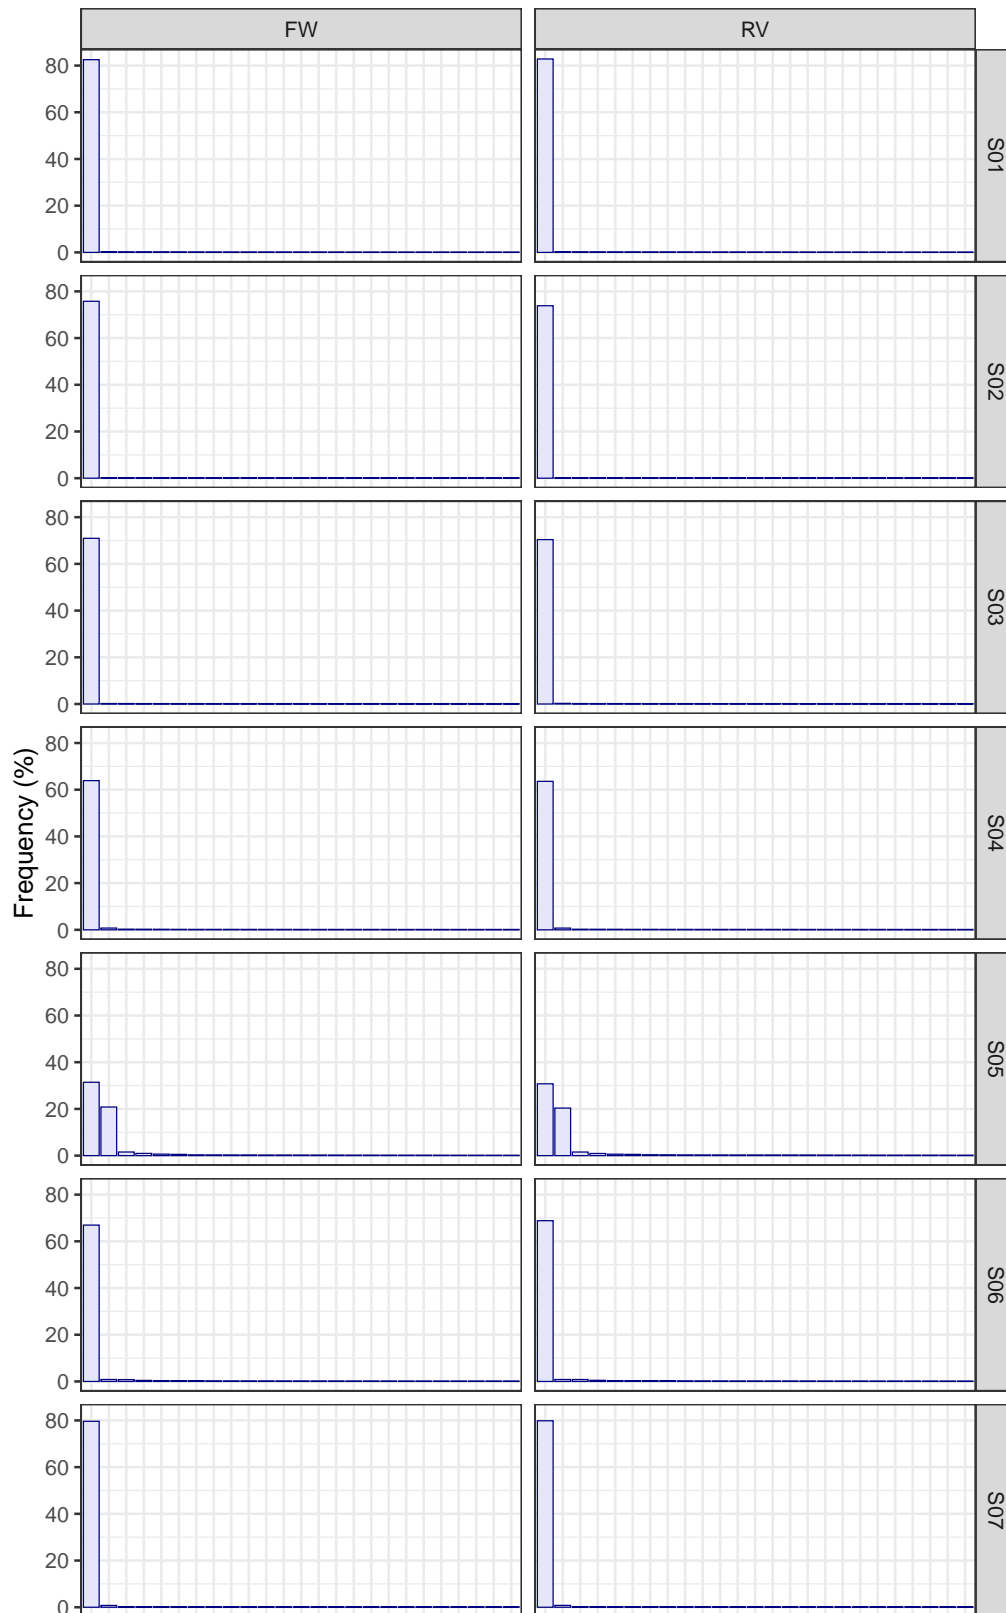

# Top 25 haplotypes

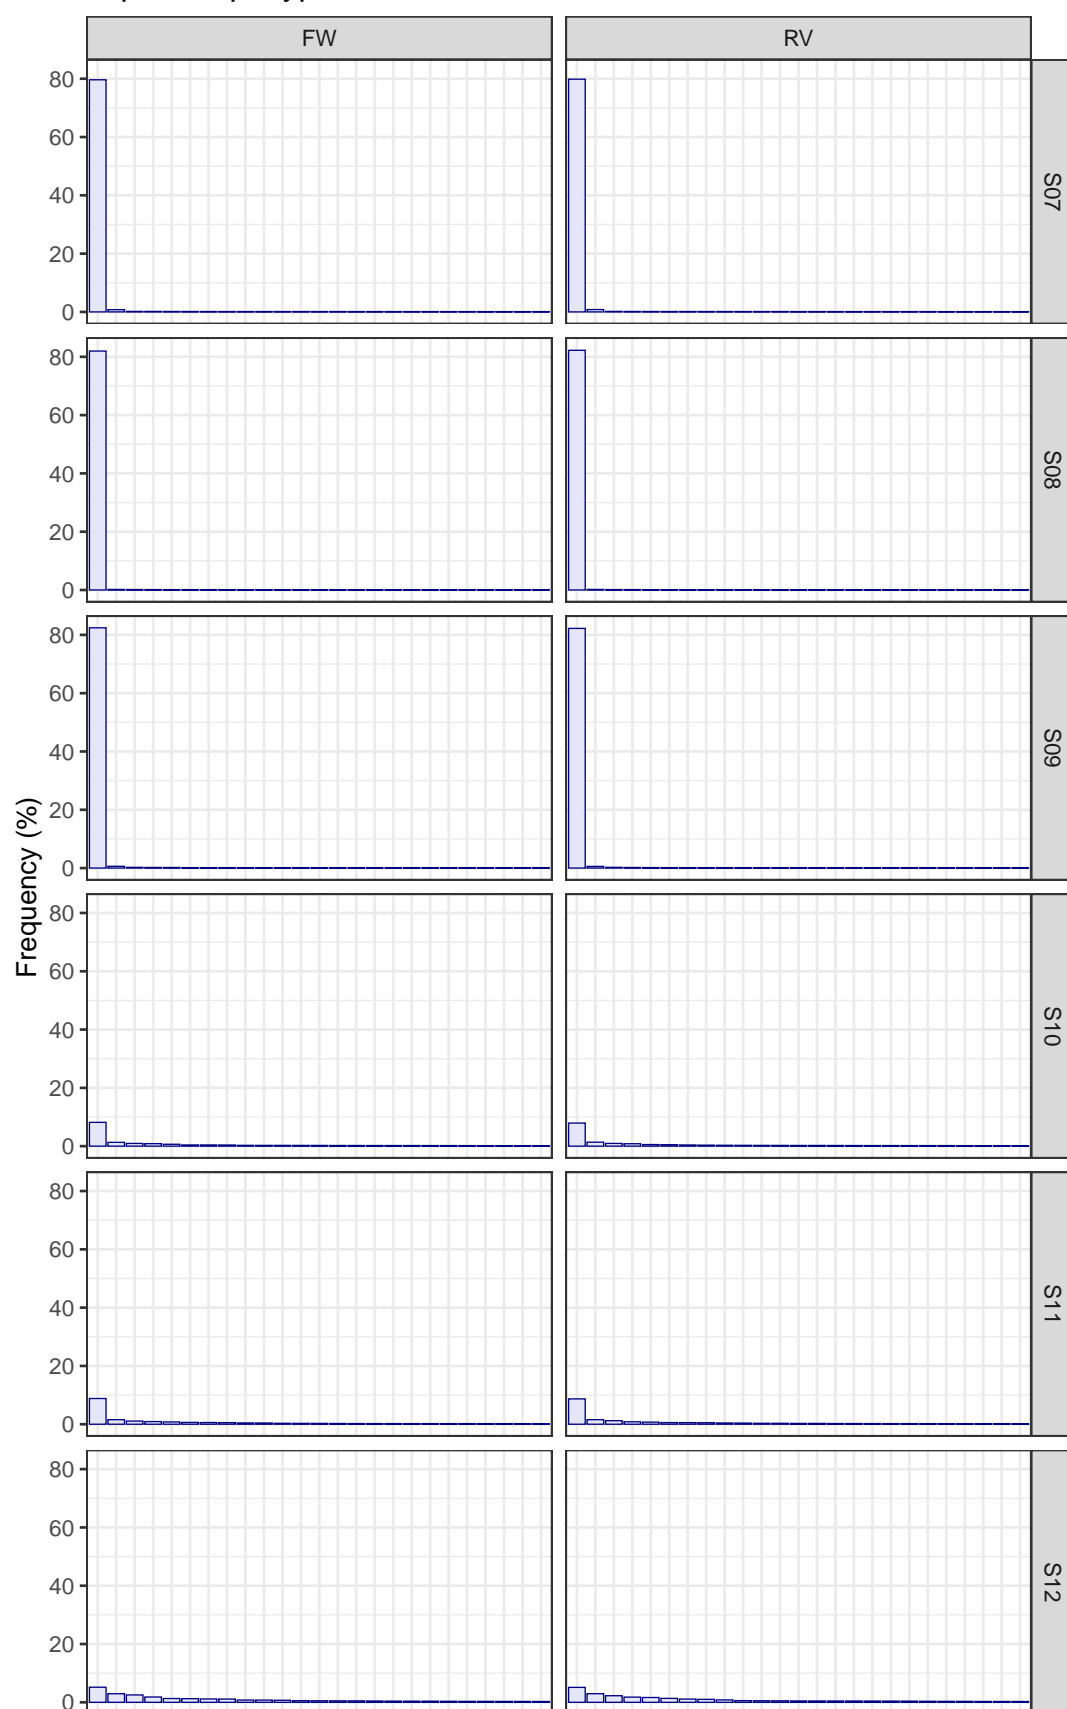

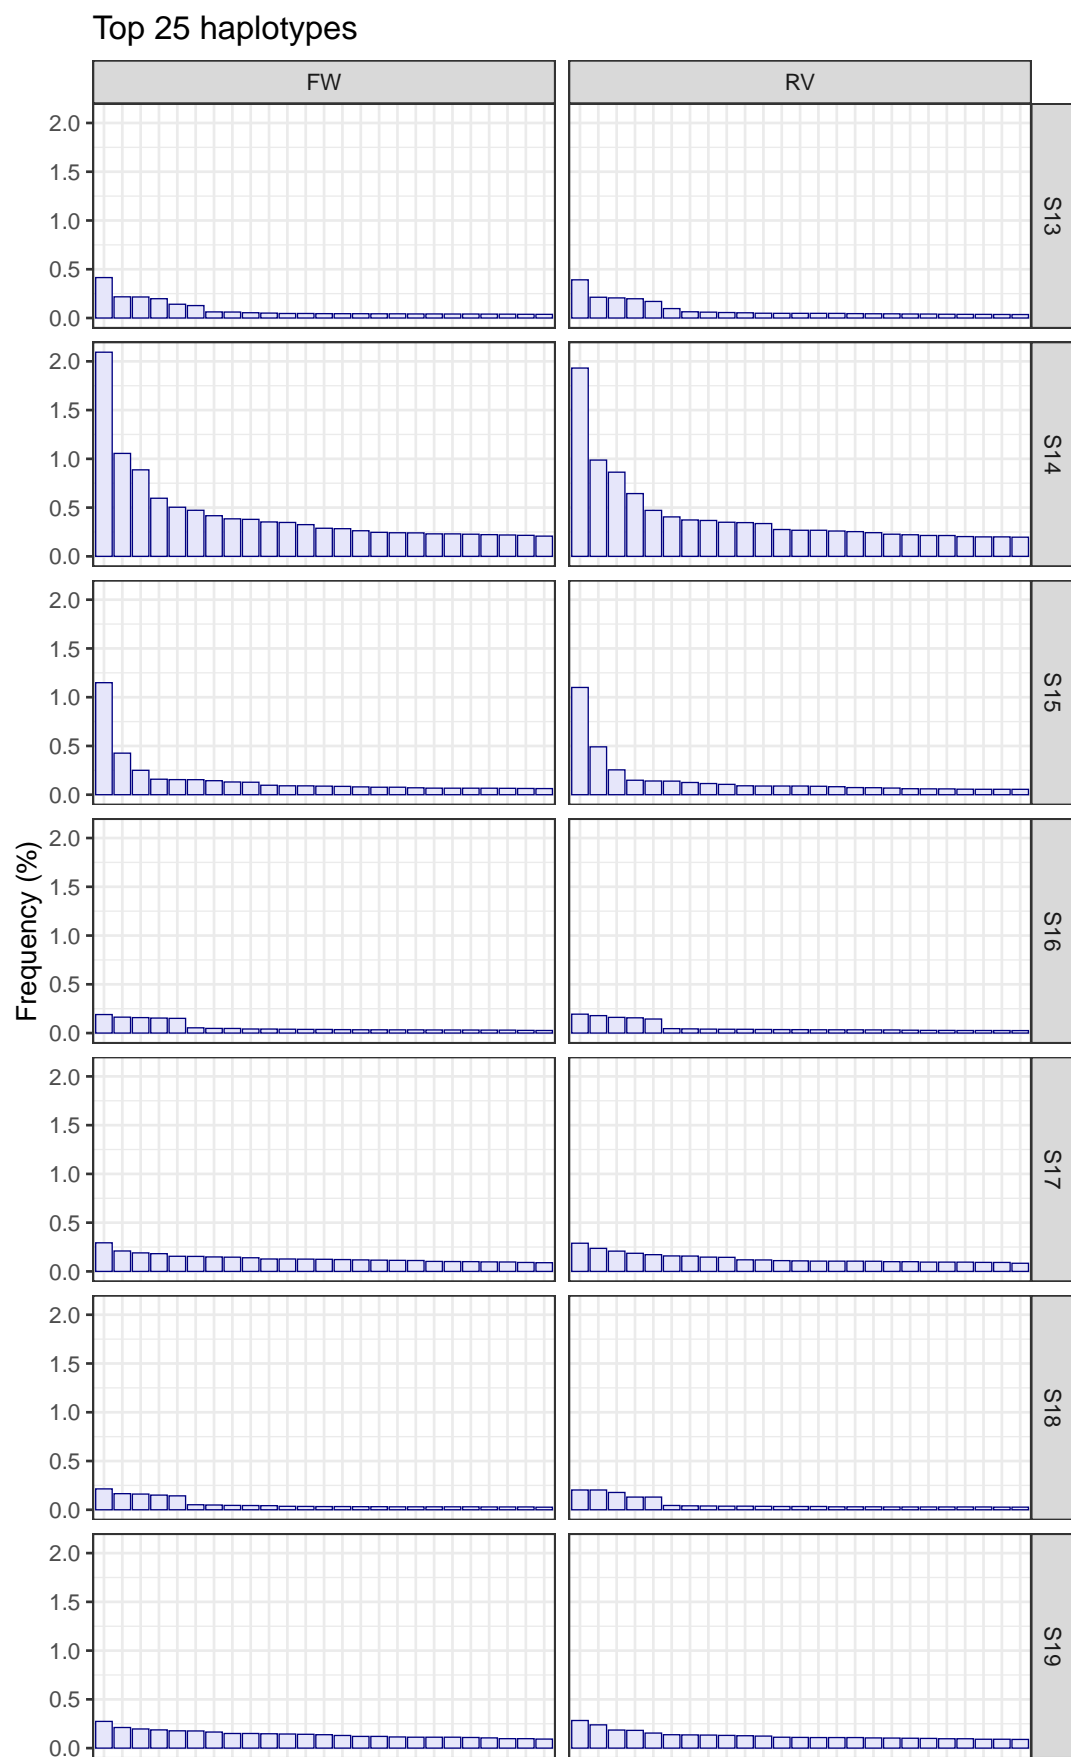

Figure S7: Frequencies of top 25 haplotypes in decreasing order. Note the scale change in the frequency axis, for samples S13 to S19, to improve readability.



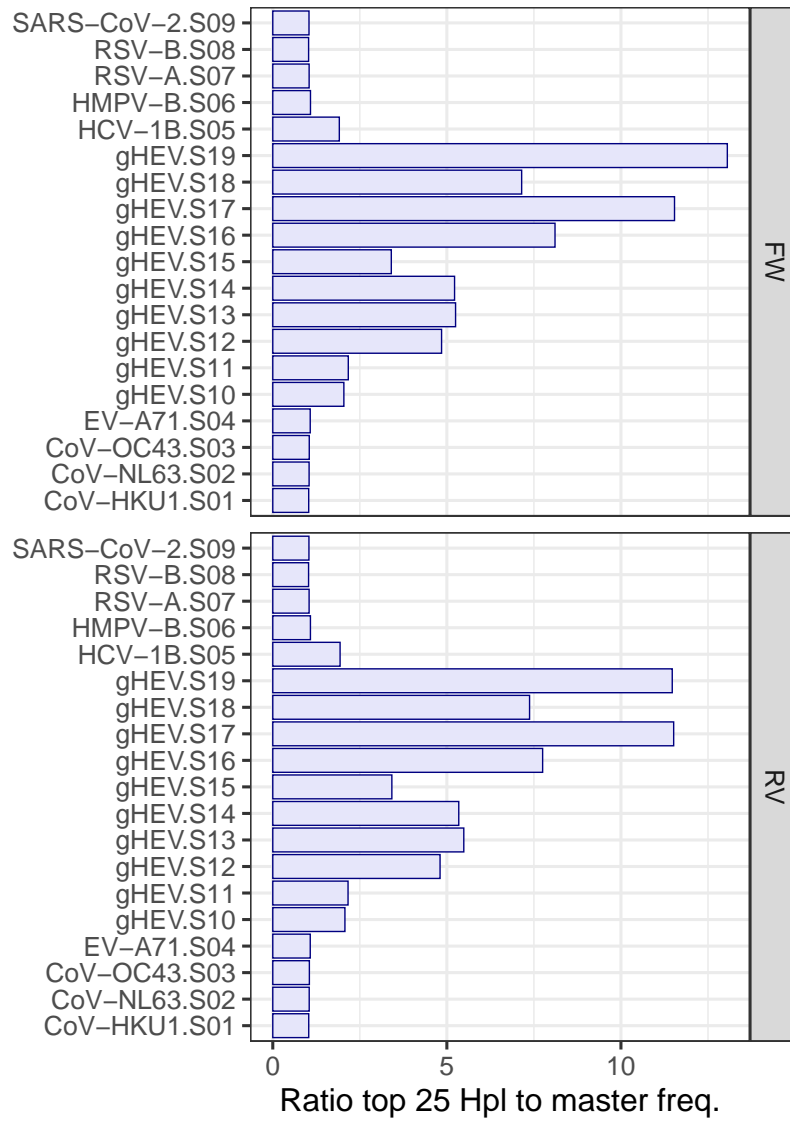

Figure S8: Ratio of the fraction of reads accounting for the top 25 most frequent haplotypes to the master haplotype.

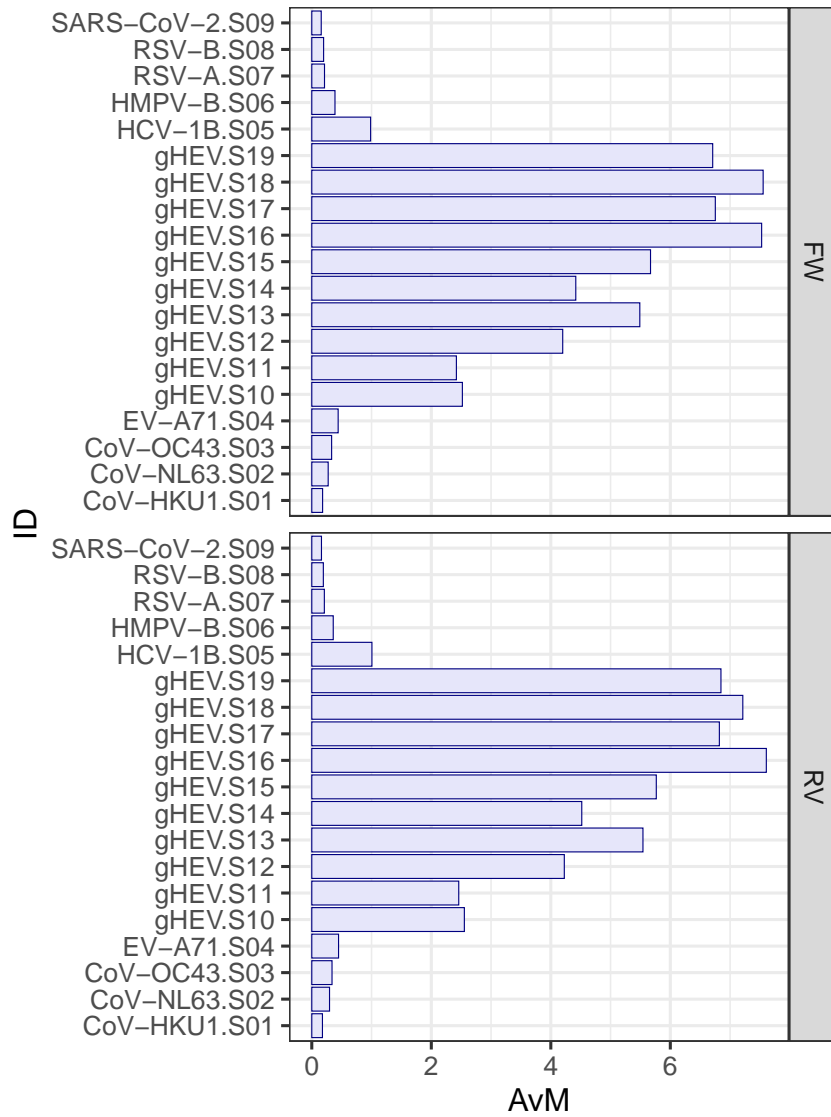

Figure S9: Average number of substitutions per read relative to the master haplotype.

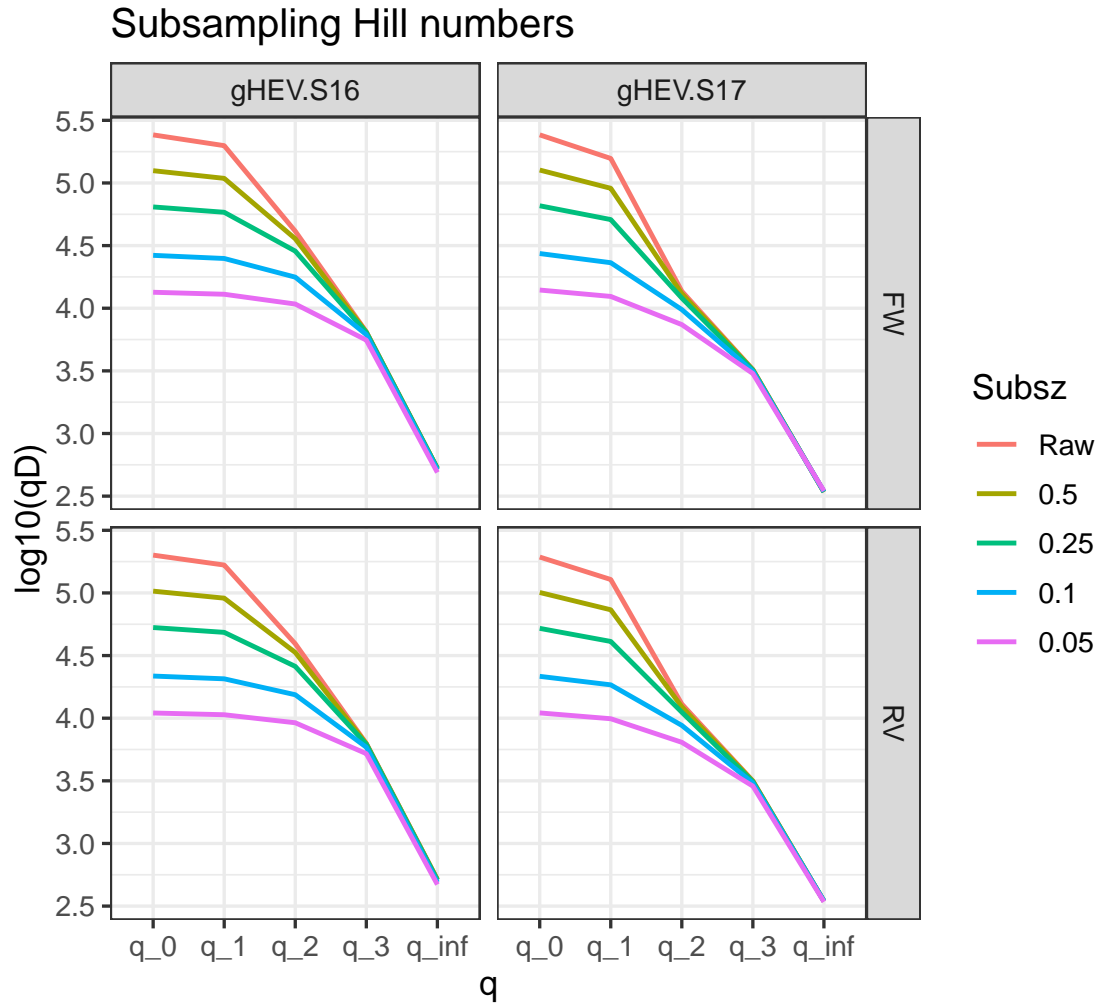

Figure S10: Effect of rarefaction on Hill numbers of different order  $q$ . The sensitivity of Hill numbers decreases as  $q$  increases, being  $q=0$  the most sensitive, and with  $q$  over 3 almost insensitive. Subsz: fraction of subsampling.

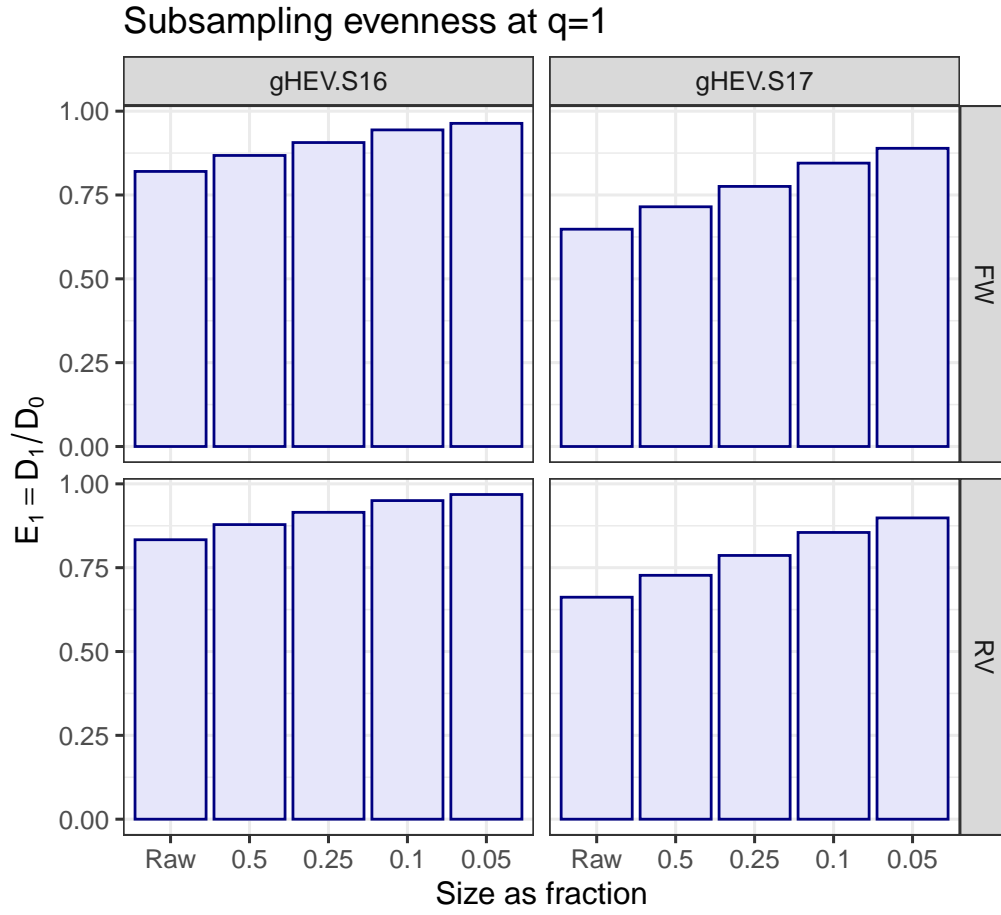

Figure S11: Effect of rarefaction on evenness  $^1E = ^1D/^0D$ . Decreasing fractions result in increasing values of evenness.

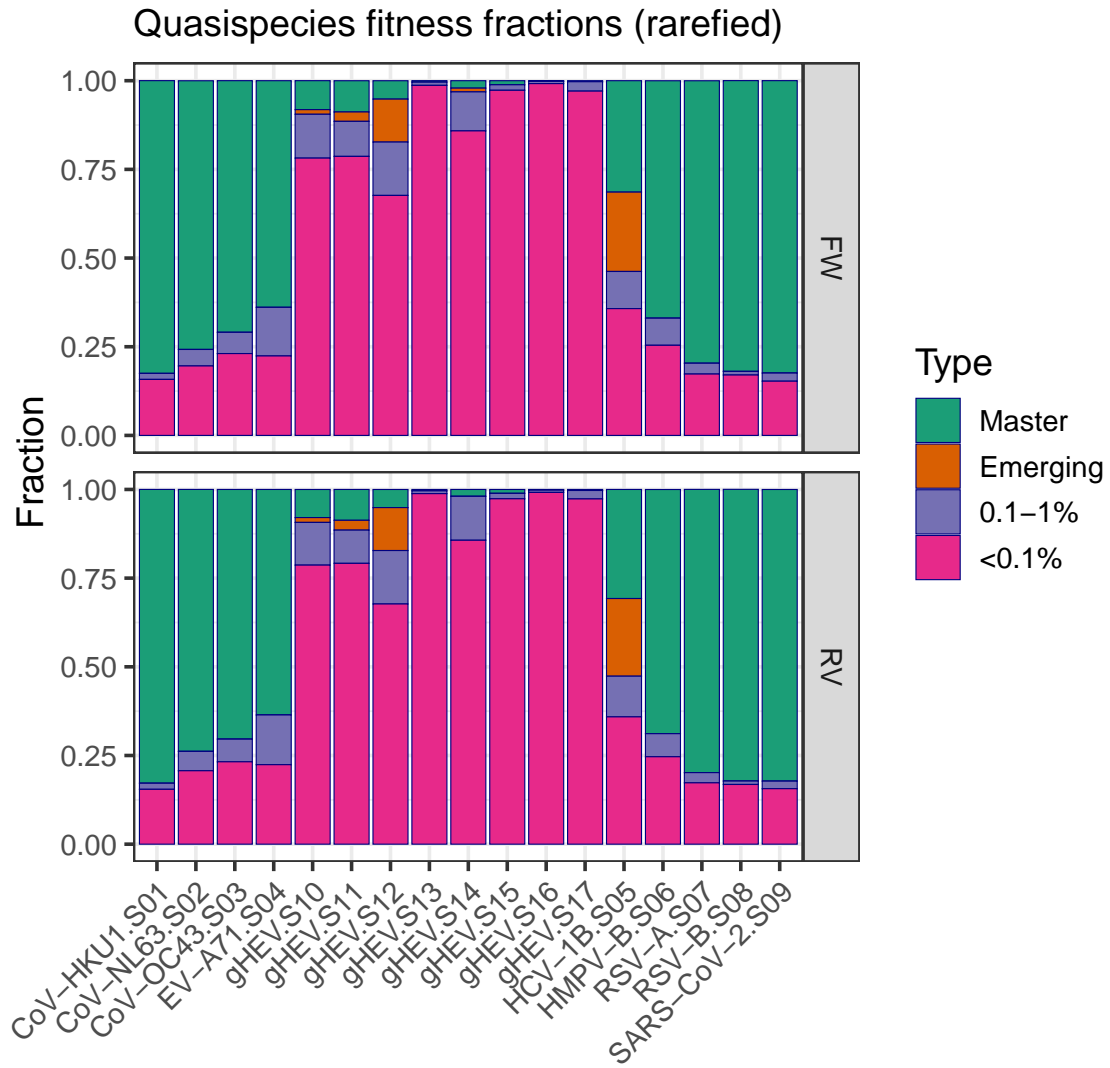

Figure S12: Quasispecies Fitness Fractions, rarefied to 194,000 reads.

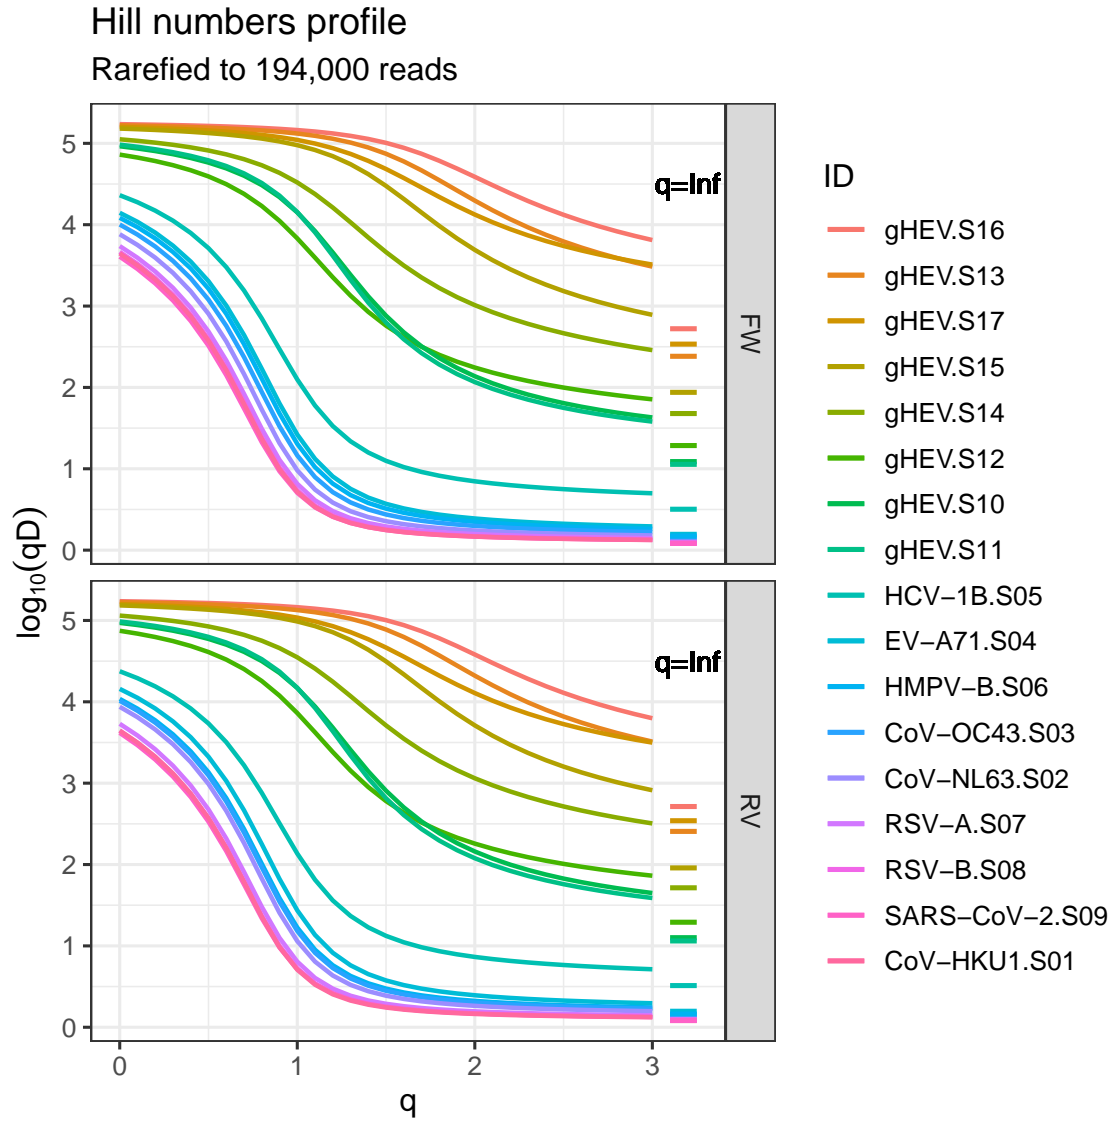

Figure S13: Rarefied Hill numbers profiles. Labels sorted in decreasing order of  ${}^2D$  at  $q = 2$ .

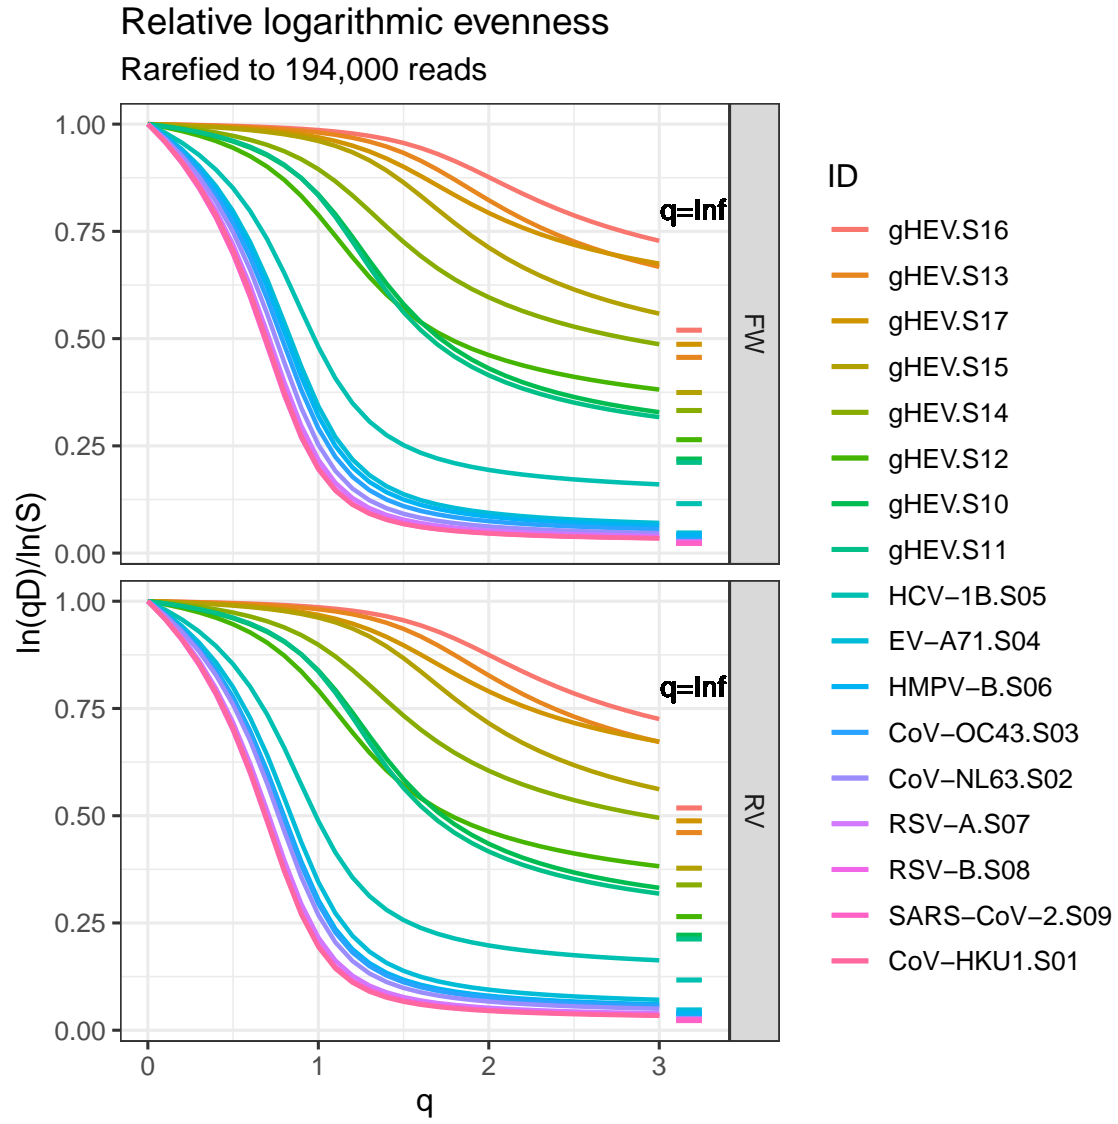

Figure S14: Rarefied relative logarithmic evenness profile. Labels sorted in decreasing order of  ${}^2D$  at  $q = 2$ .

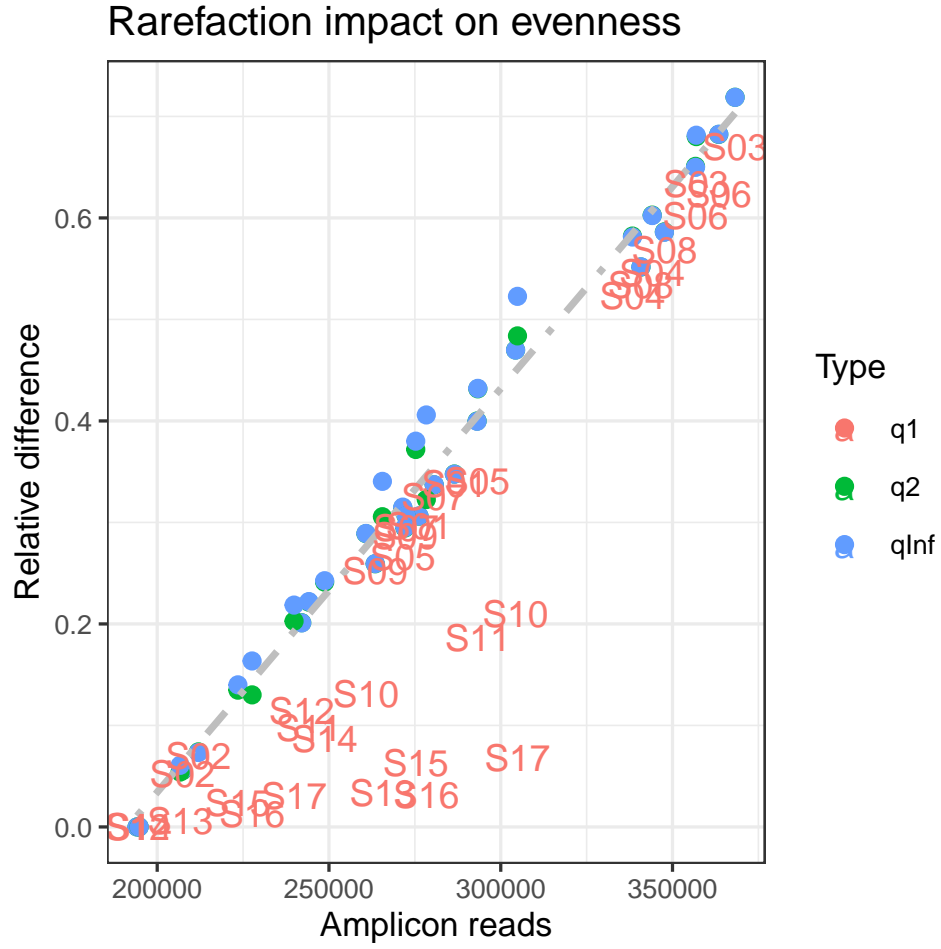

Figure S15: Impact of rarefaction of each sample to the reference size of 194,000 reads, on evenness values: scatter-plot of raw reads per amplicon to the relative difference:  $((\text{rare} - \text{raw}) / \text{raw})$ .  
q1:  ${}^1E = {}^1D / {}^0D$ ; q2:  ${}^2E = {}^2D / {}^0D$ ; qInf:  ${}^\infty E = {}^\infty D / {}^0D$ .  
Labels are represented for q1 values.  
Dash-dot line: linear regression of the ensemble of evenness values corresponding to q2 and qInf ( ${}^2E$  and  ${}^\infty E$ ).
