# Supplementary figures and images for: In-Host Flat-like Quasispecies: Characterization Methods and Clinical Implications
Source: MDPI journal article supplement (doi:10.3390/microorganisms12051011), 2024-05-17

# Full coverage by strand (reads)

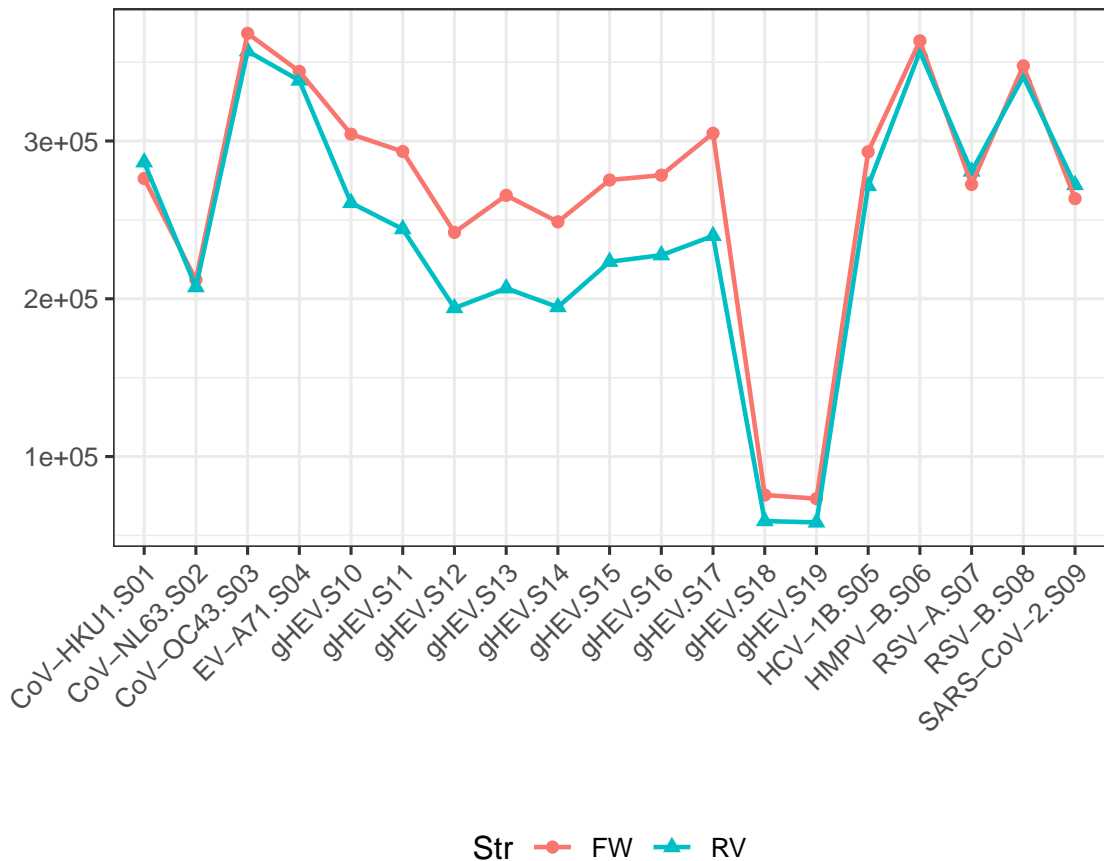

Supplement: s1 [file s1]

Index of flatness at  $q=\text{Inf}$

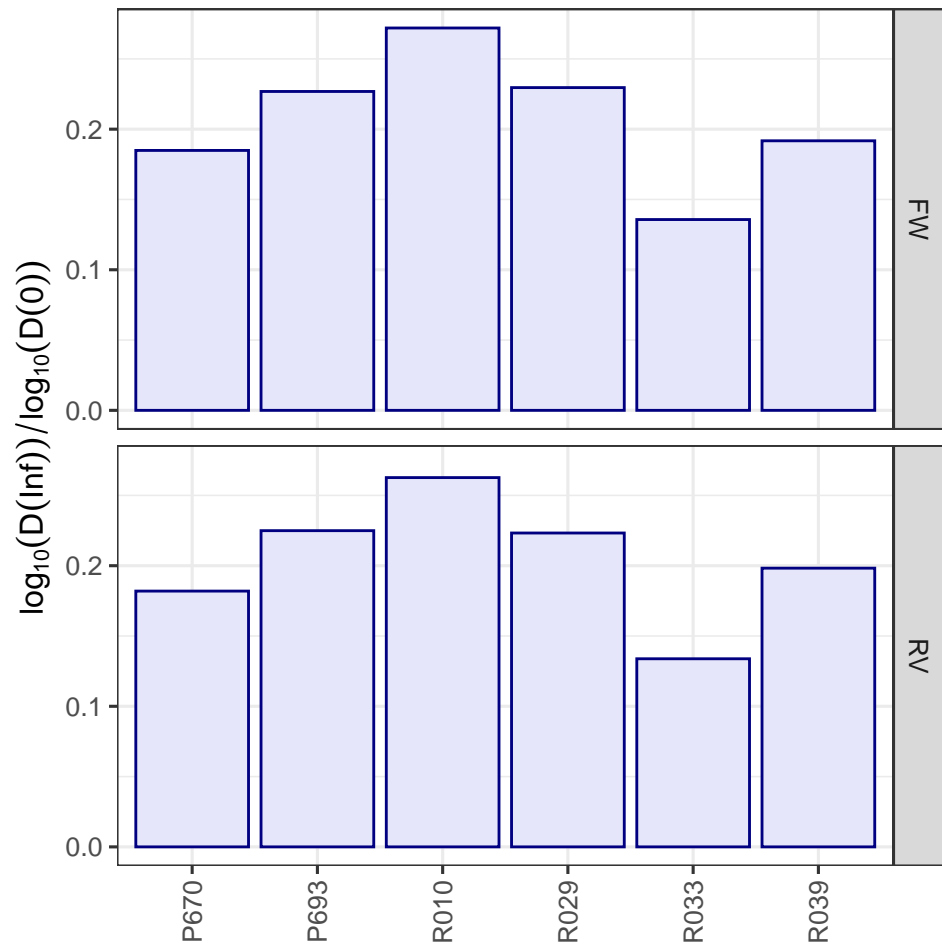

Supplement: s1 [file s1]

# Quasispecies fitness fractions

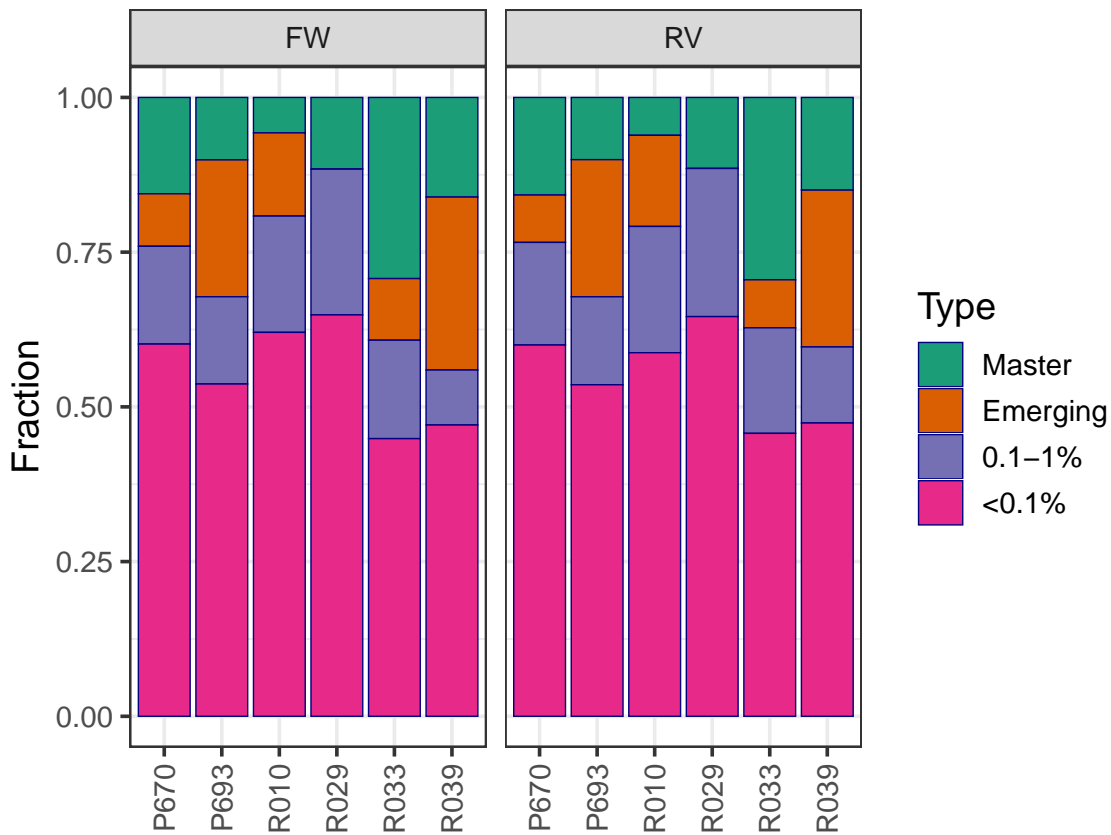

Supplement: s1 [file s1]

# Subsampling Hill numbers

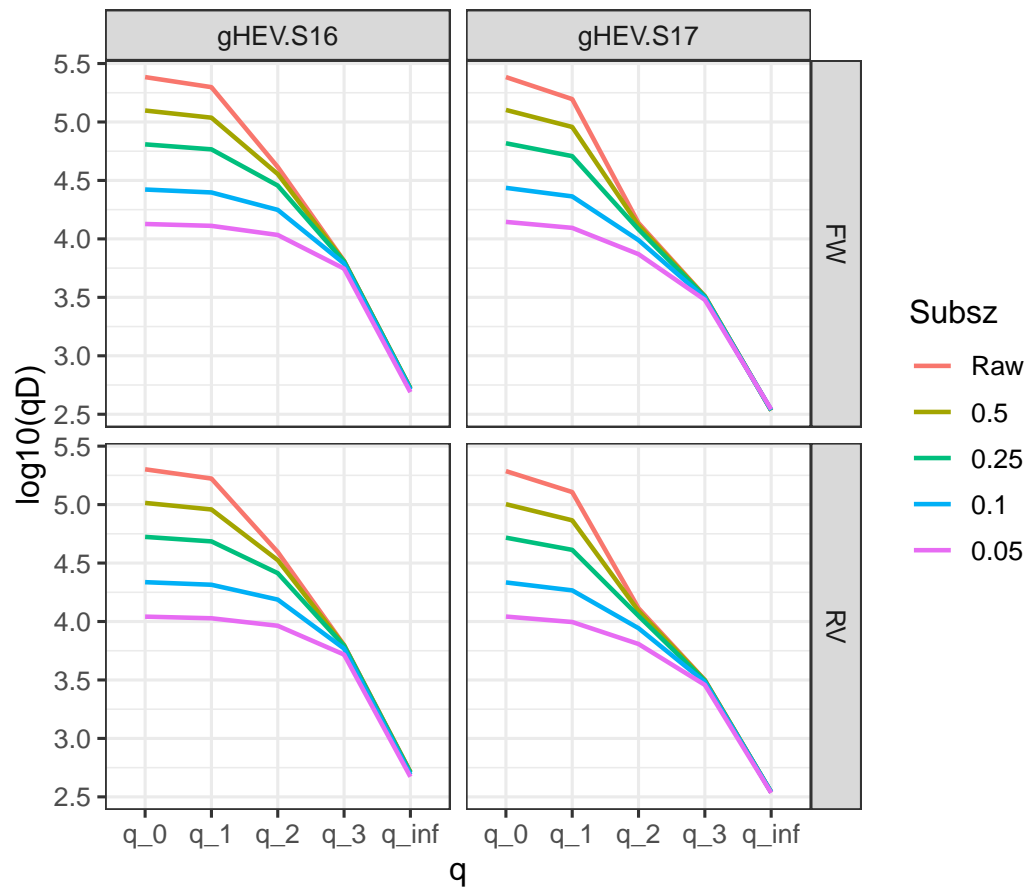

Supplement: s1 [file s1]

Index of flatness at  $q=1$

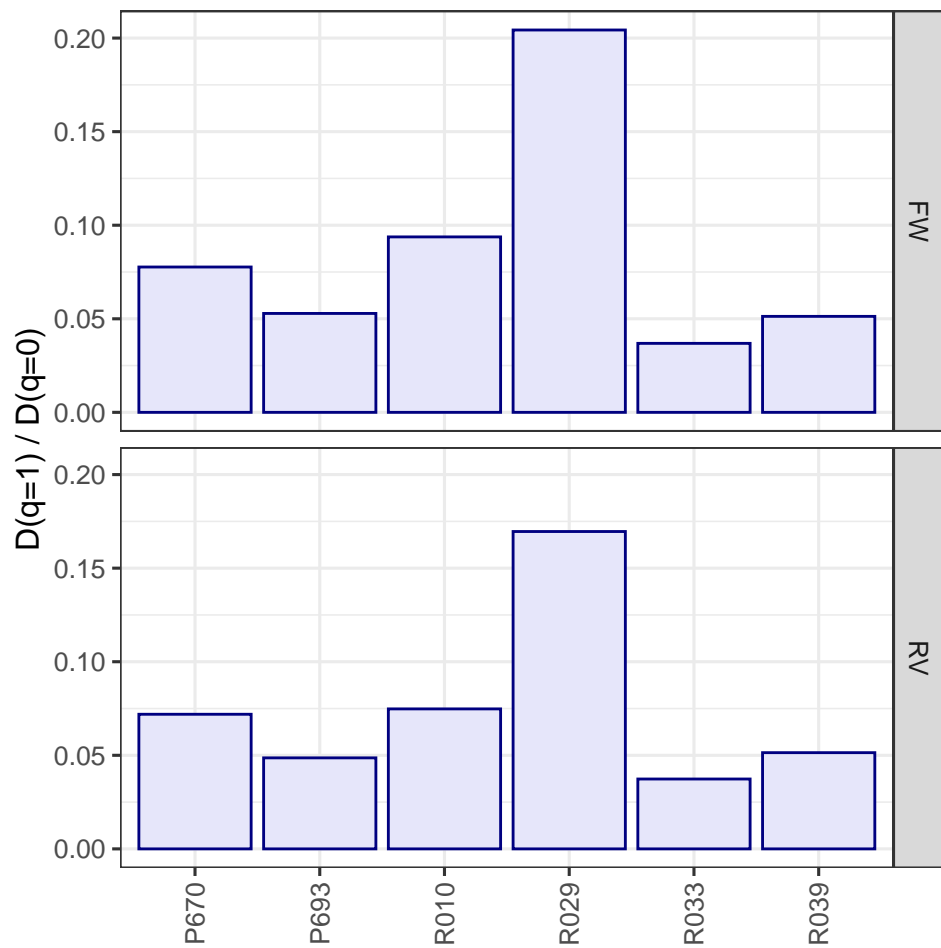

Supplement: s1 [file s1]

ID

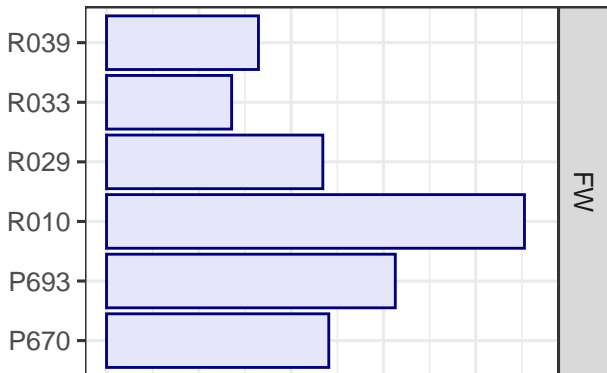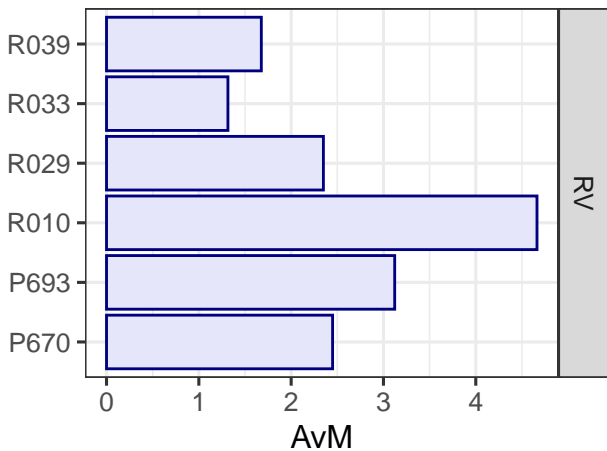

Supplement: s1 [file s1]

# Hill numbers profile

Rarefied to 25,000 reads

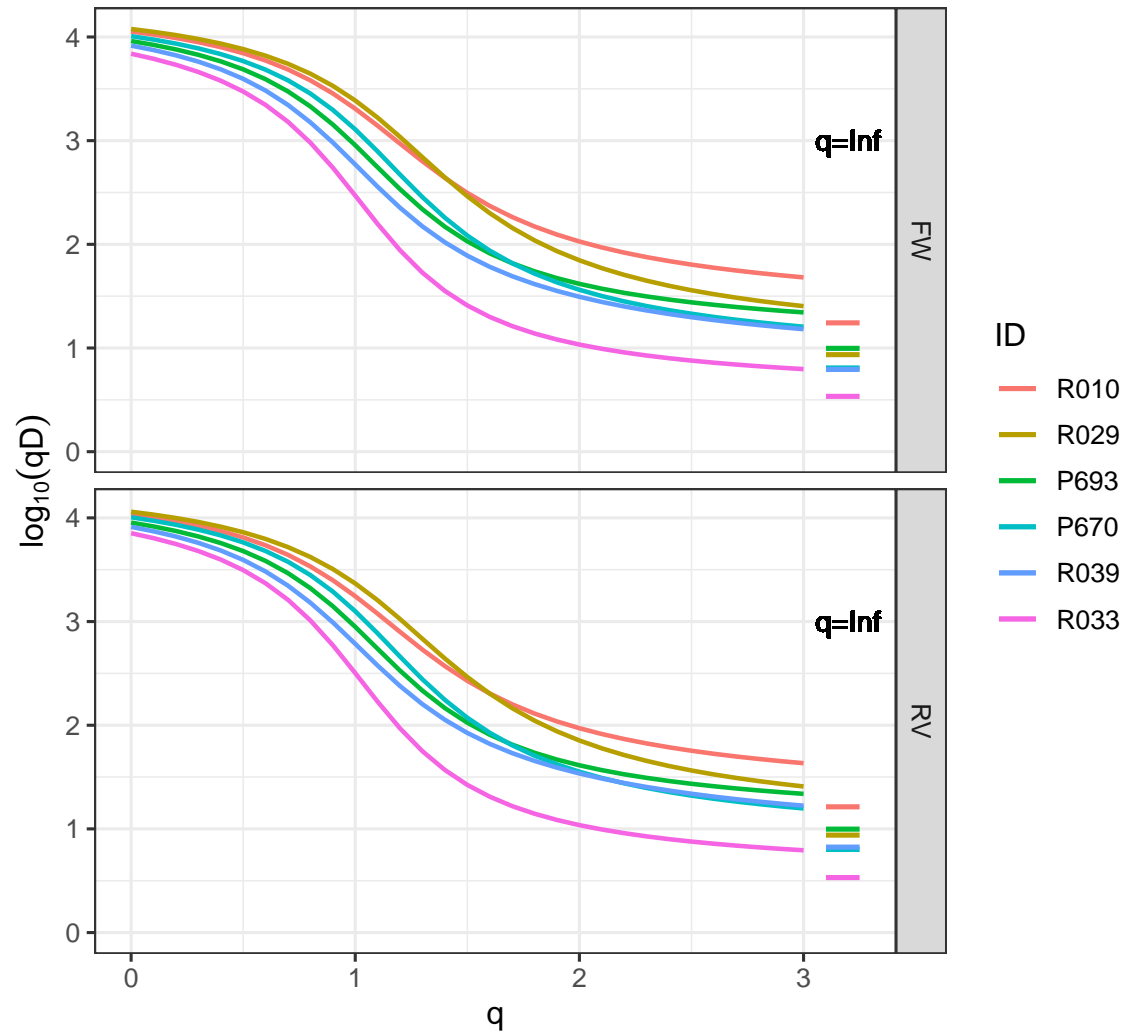

Supplement: s1 [file s1]

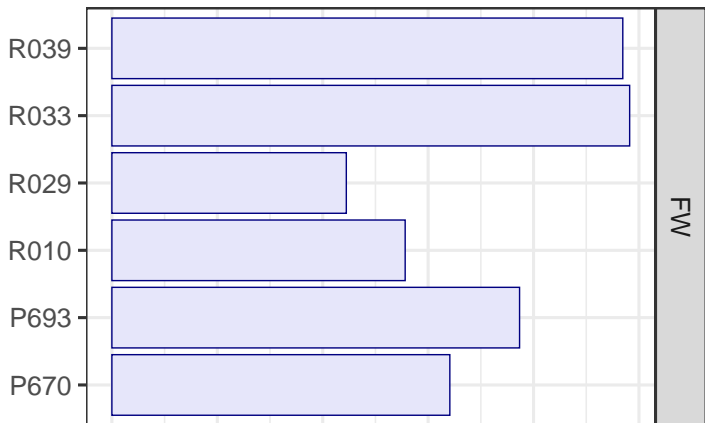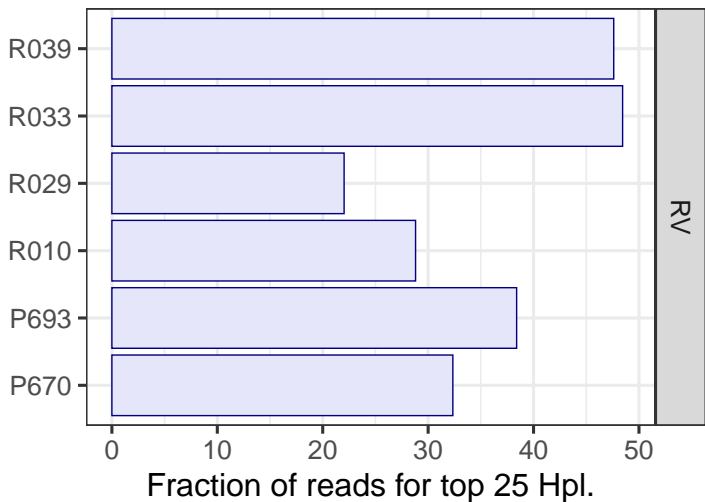

Supplement: s1 [file s1]

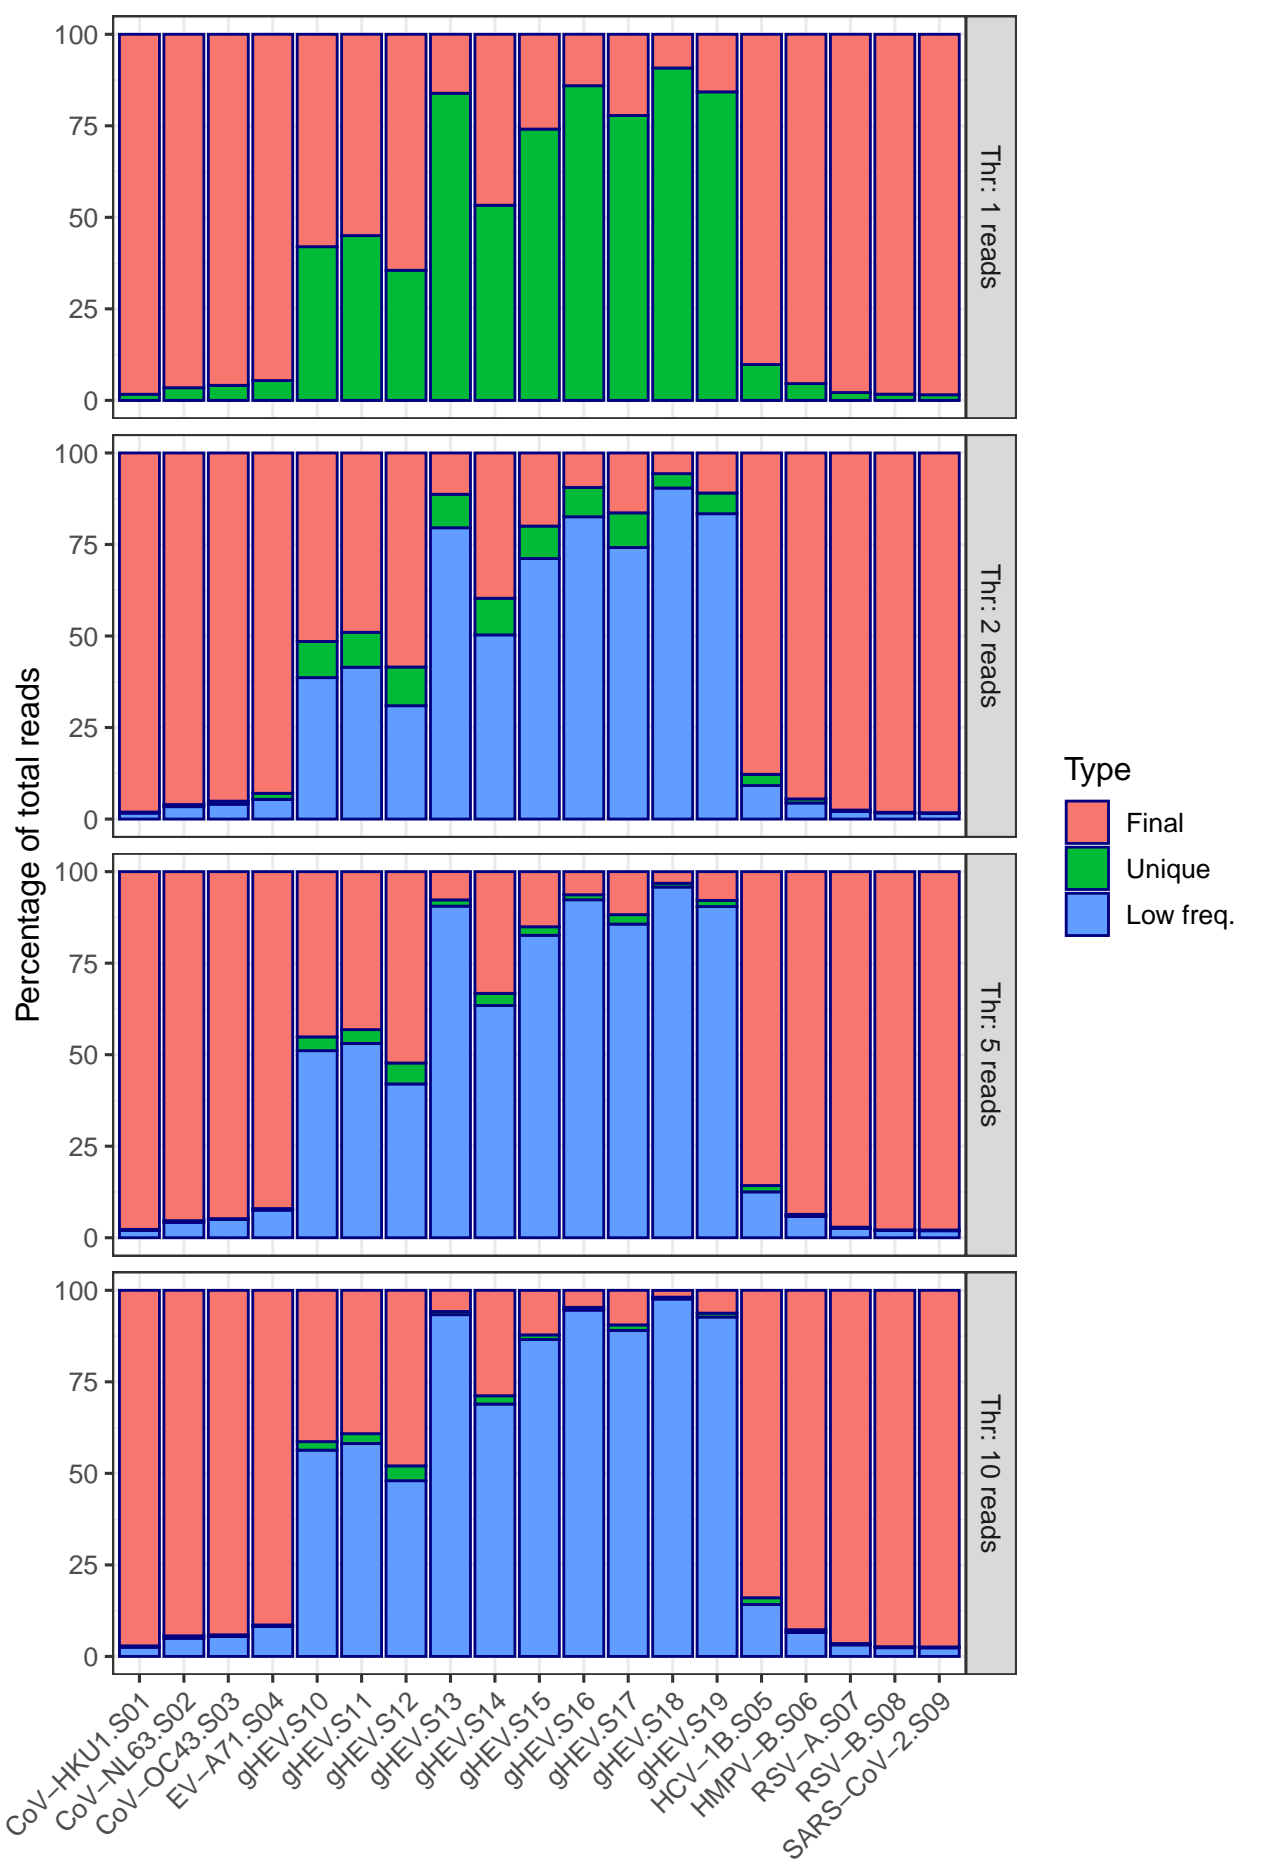

Supplement: s1 [file s1]

Hill evenness profile (raw values)

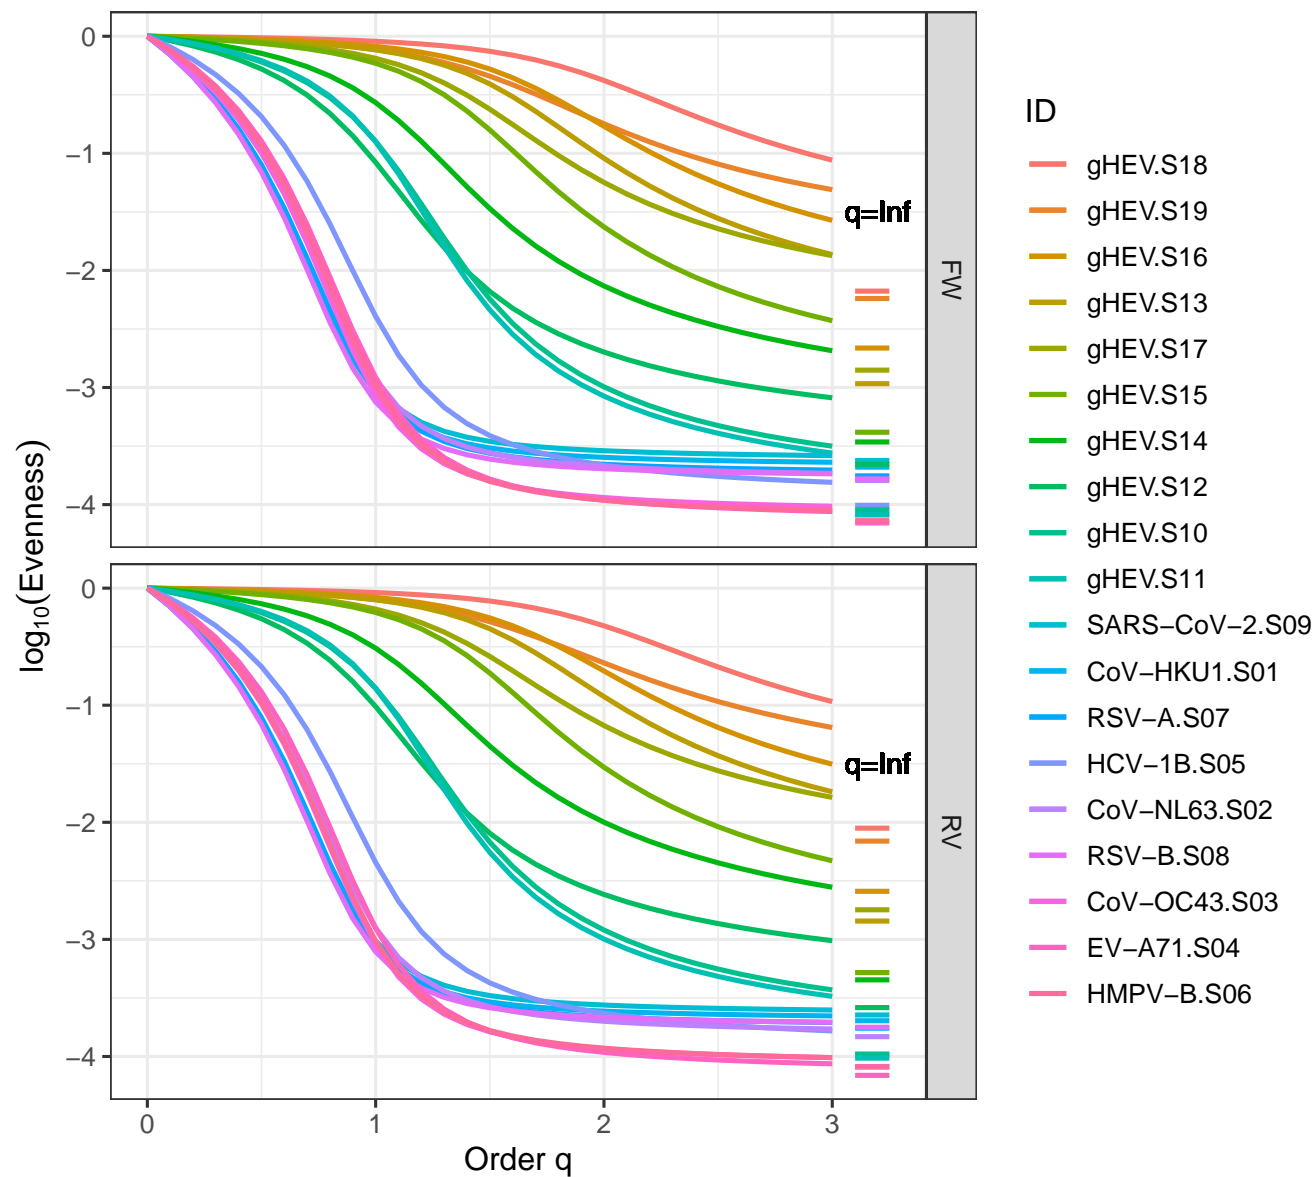

Supplement: s1 [file s1]

Fraction of reads for singletons (FW)

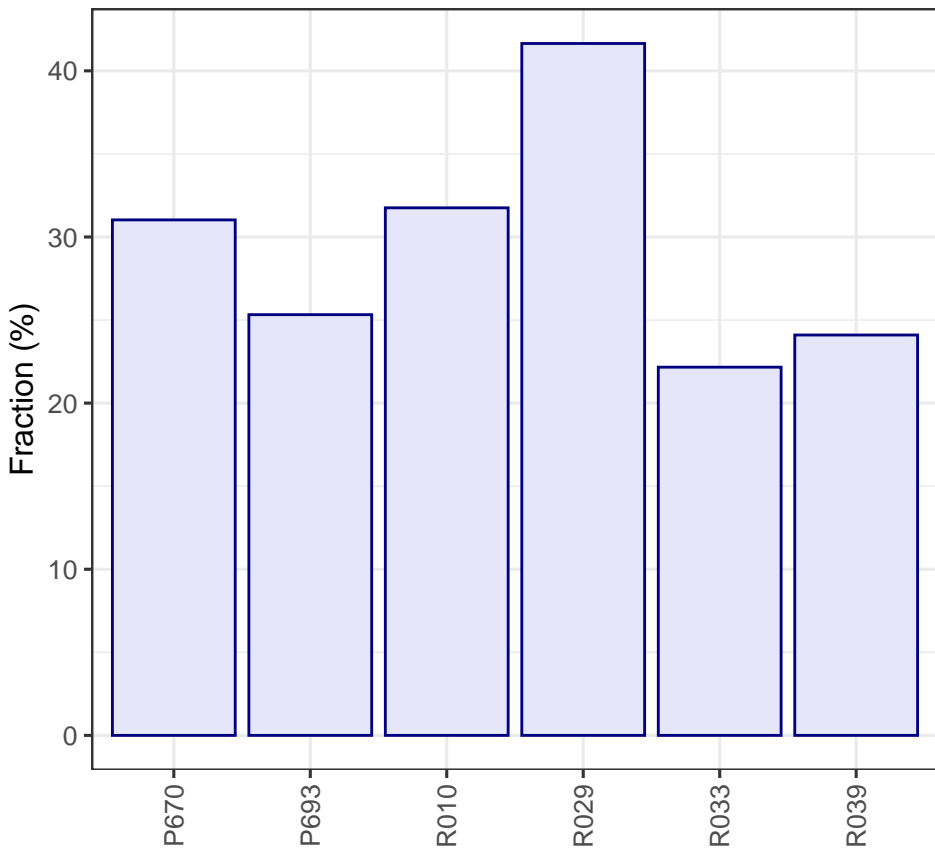

Supplement: s1 [file s1]

## Top 25 haplotypes

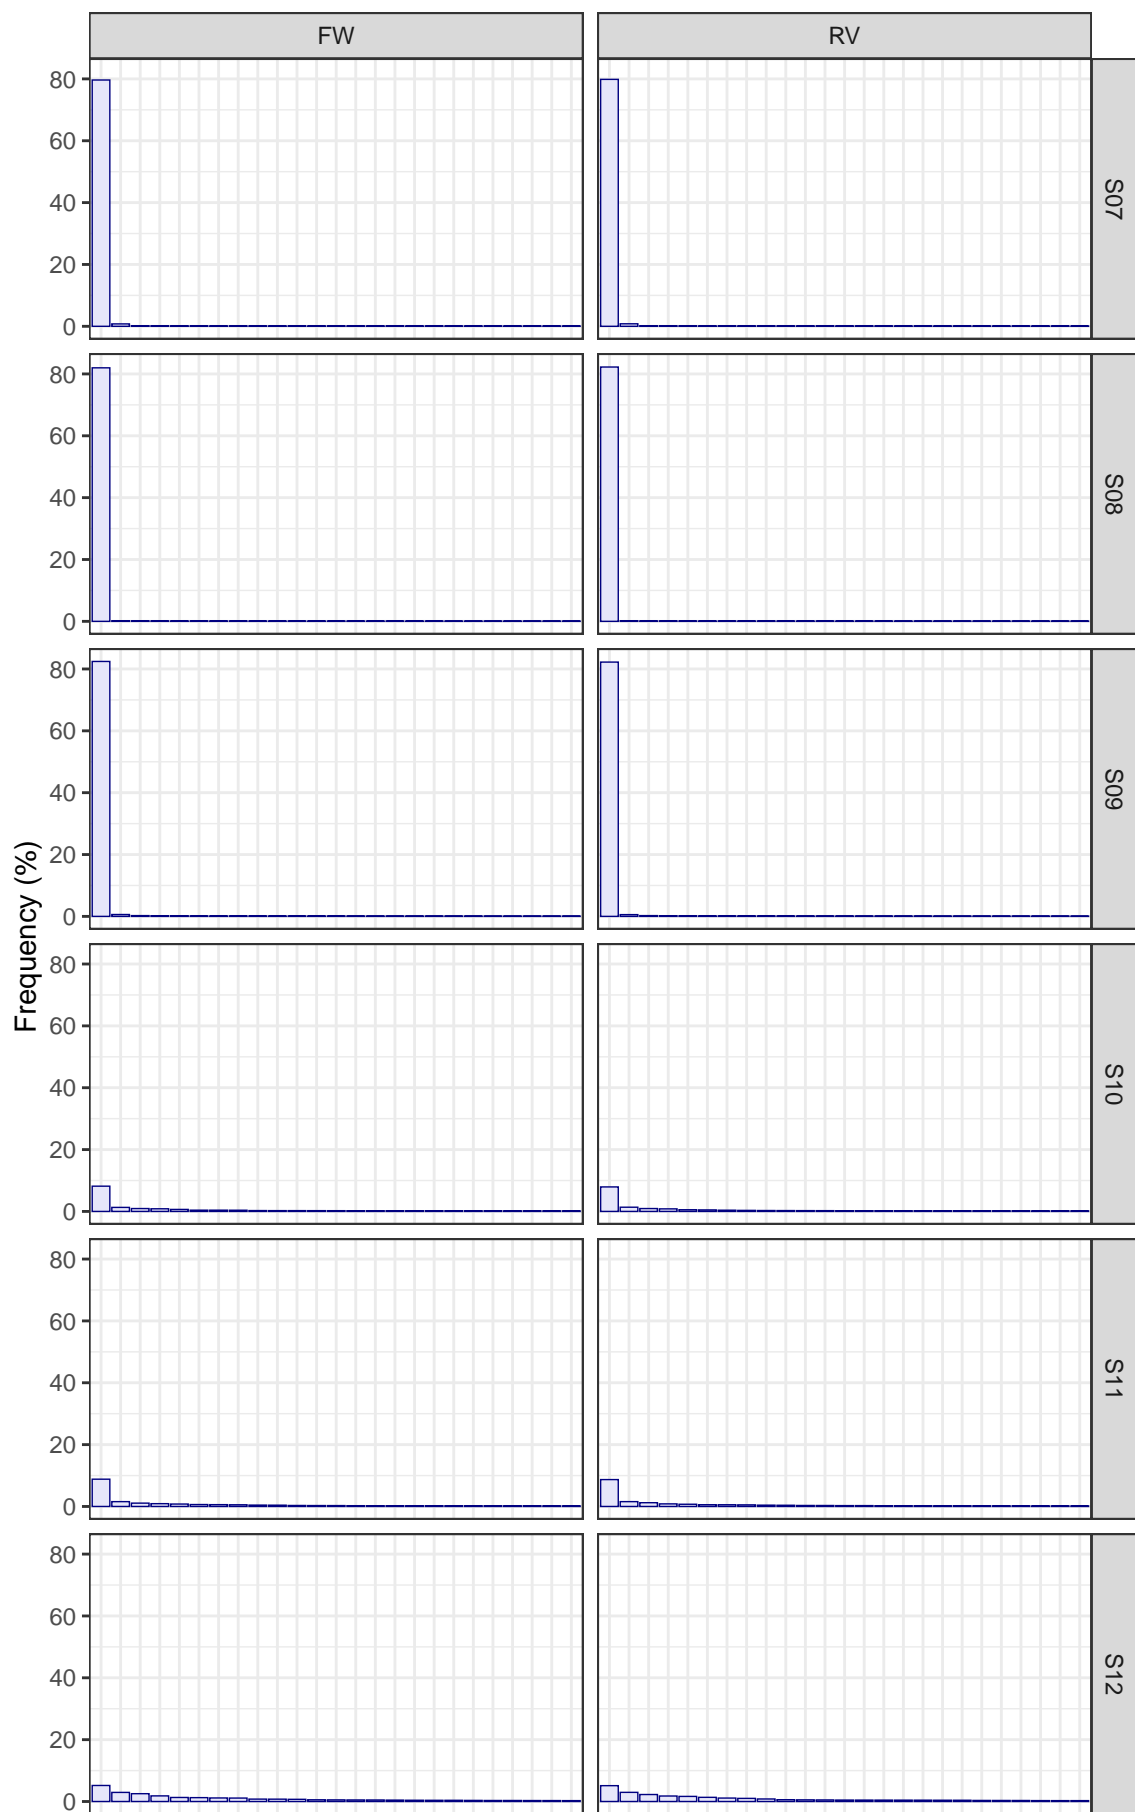

Supplement: s1 [file s1]

# Relative logarithmic evenness

Rarefied to 25,000 reads

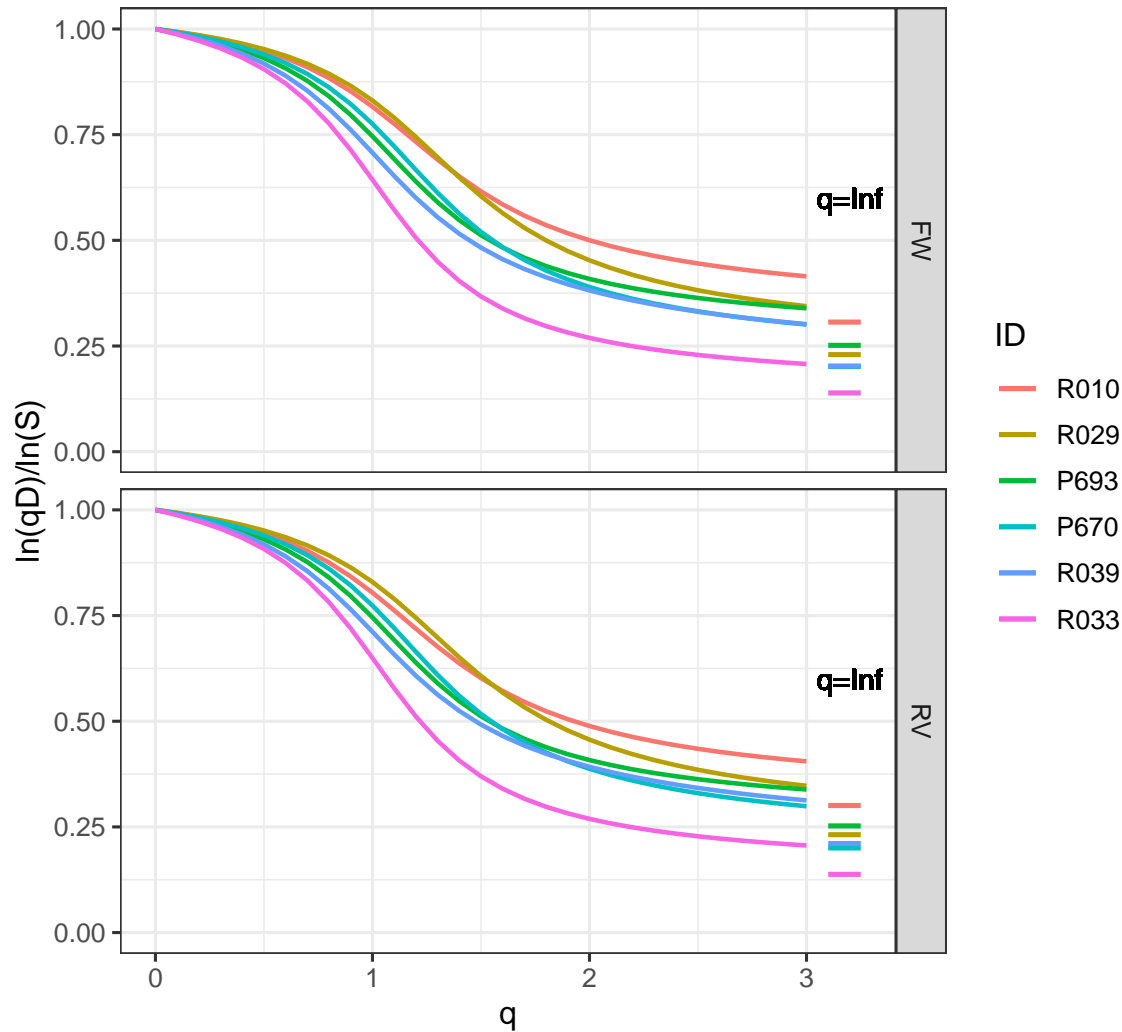

Supplement: s1 [file s1]

# Hill number profile (raw values)

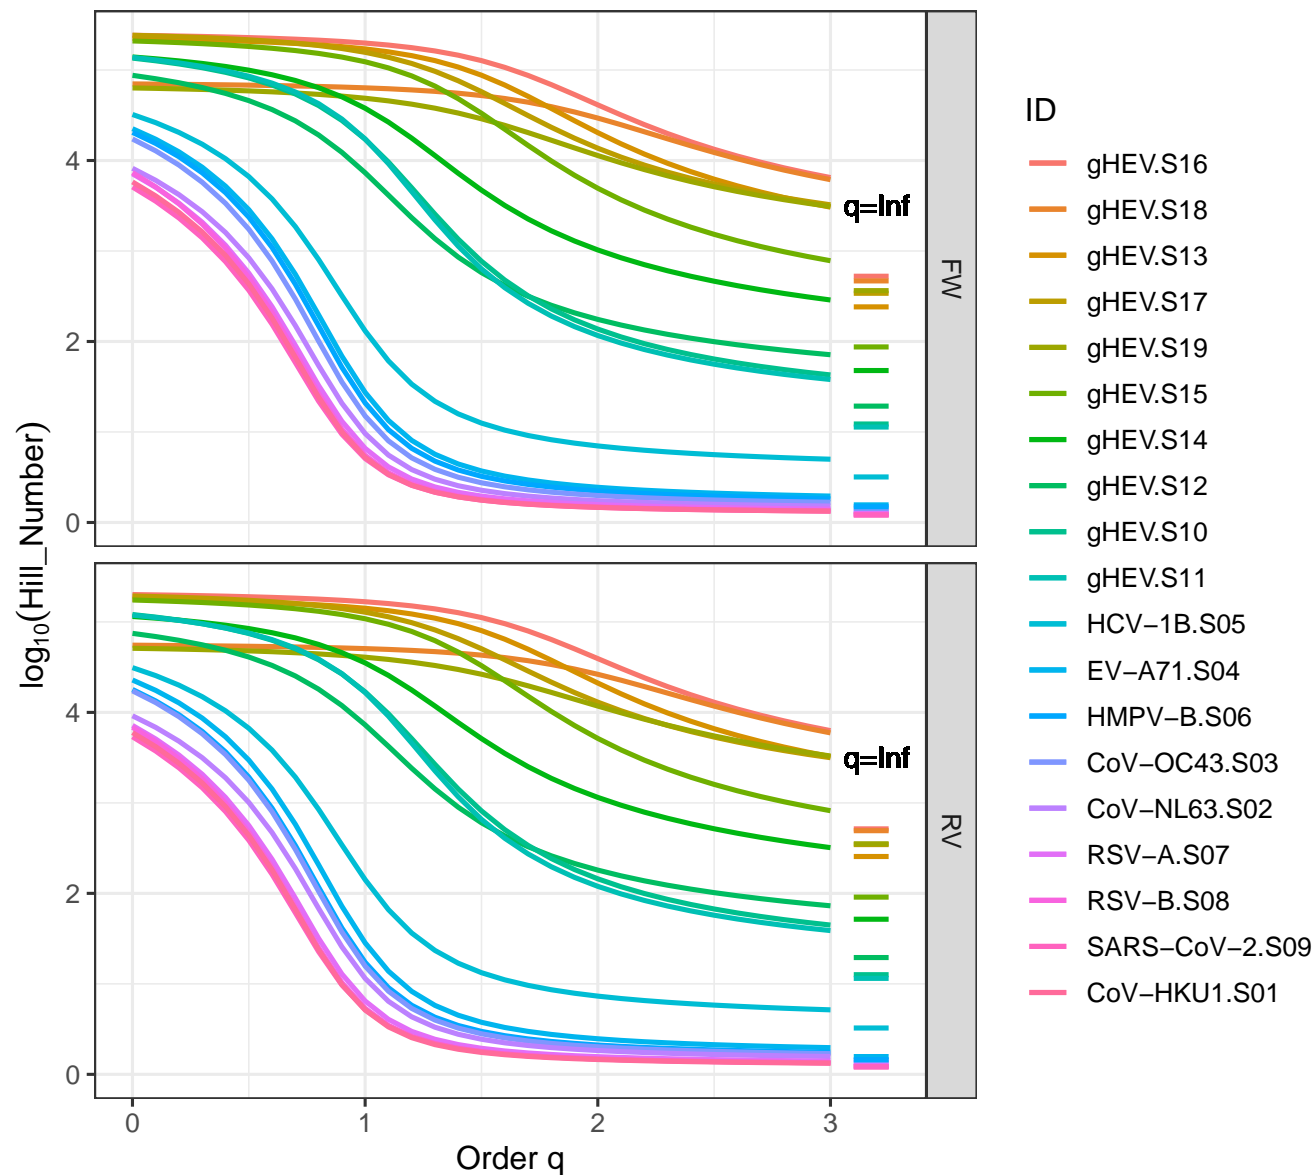

Supplement: s1 [file s1]

Full coverage by strand (reads)

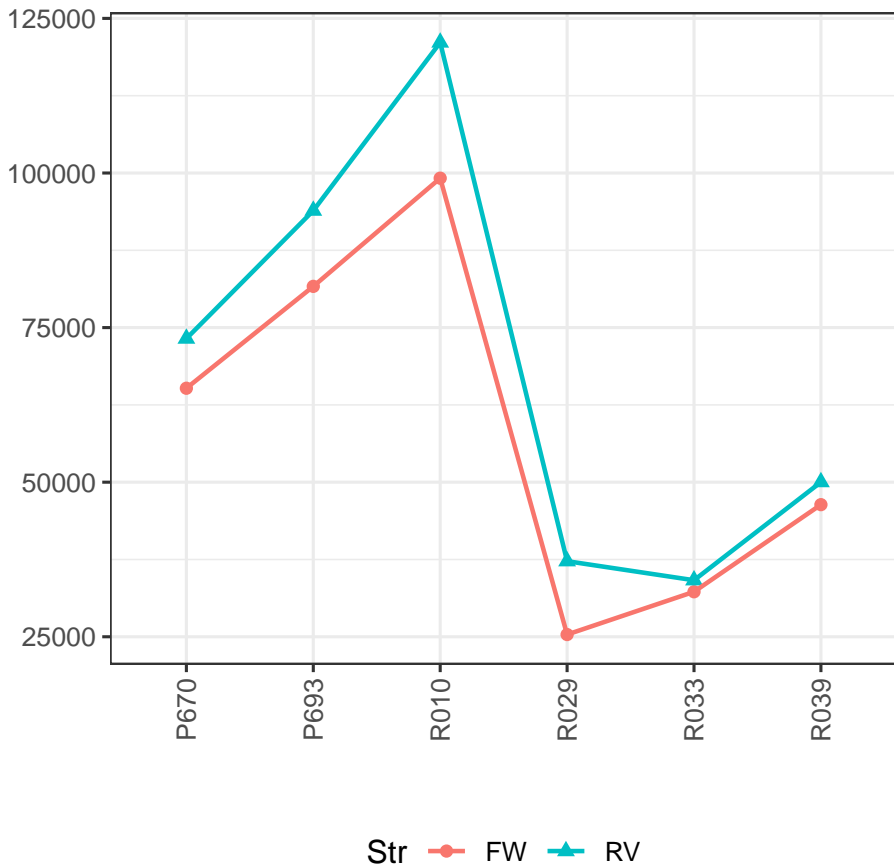

Supplement: s1 [file s1]

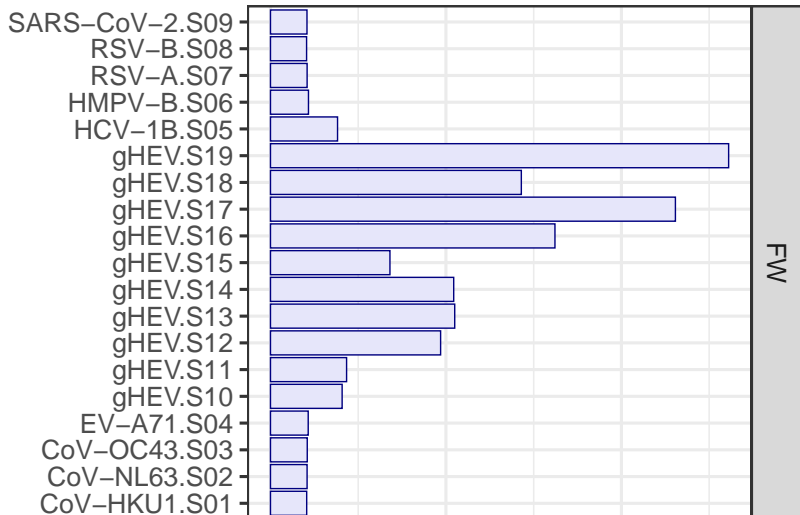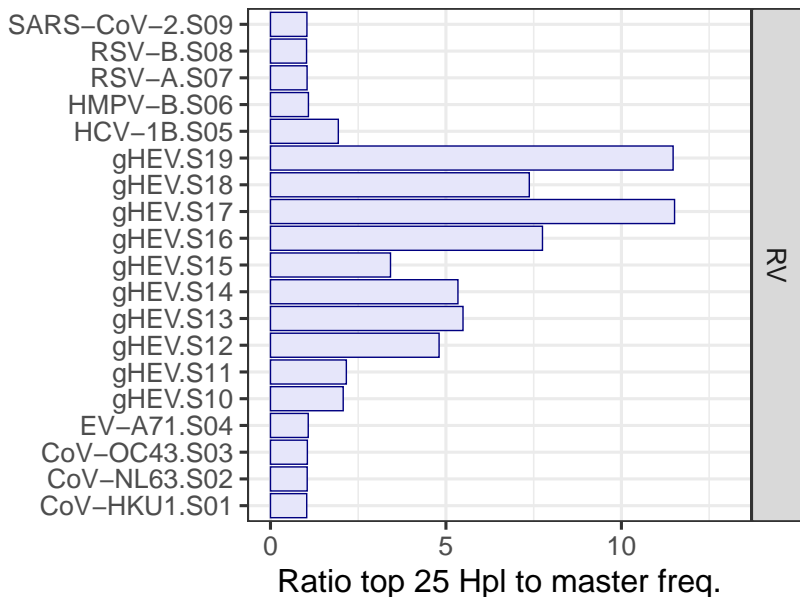

Supplement: s1 [file s1]

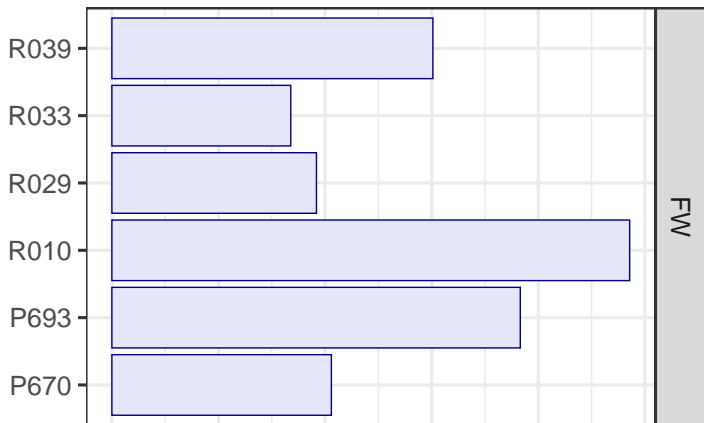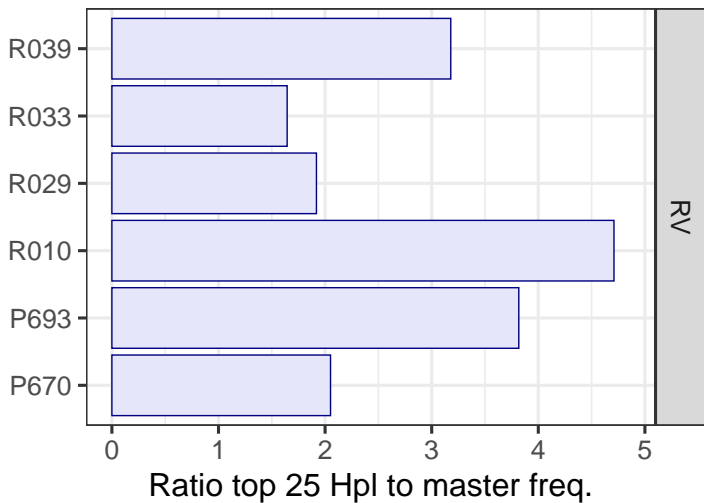

Supplement: s1 [file s1]

Top 25 haplotypes

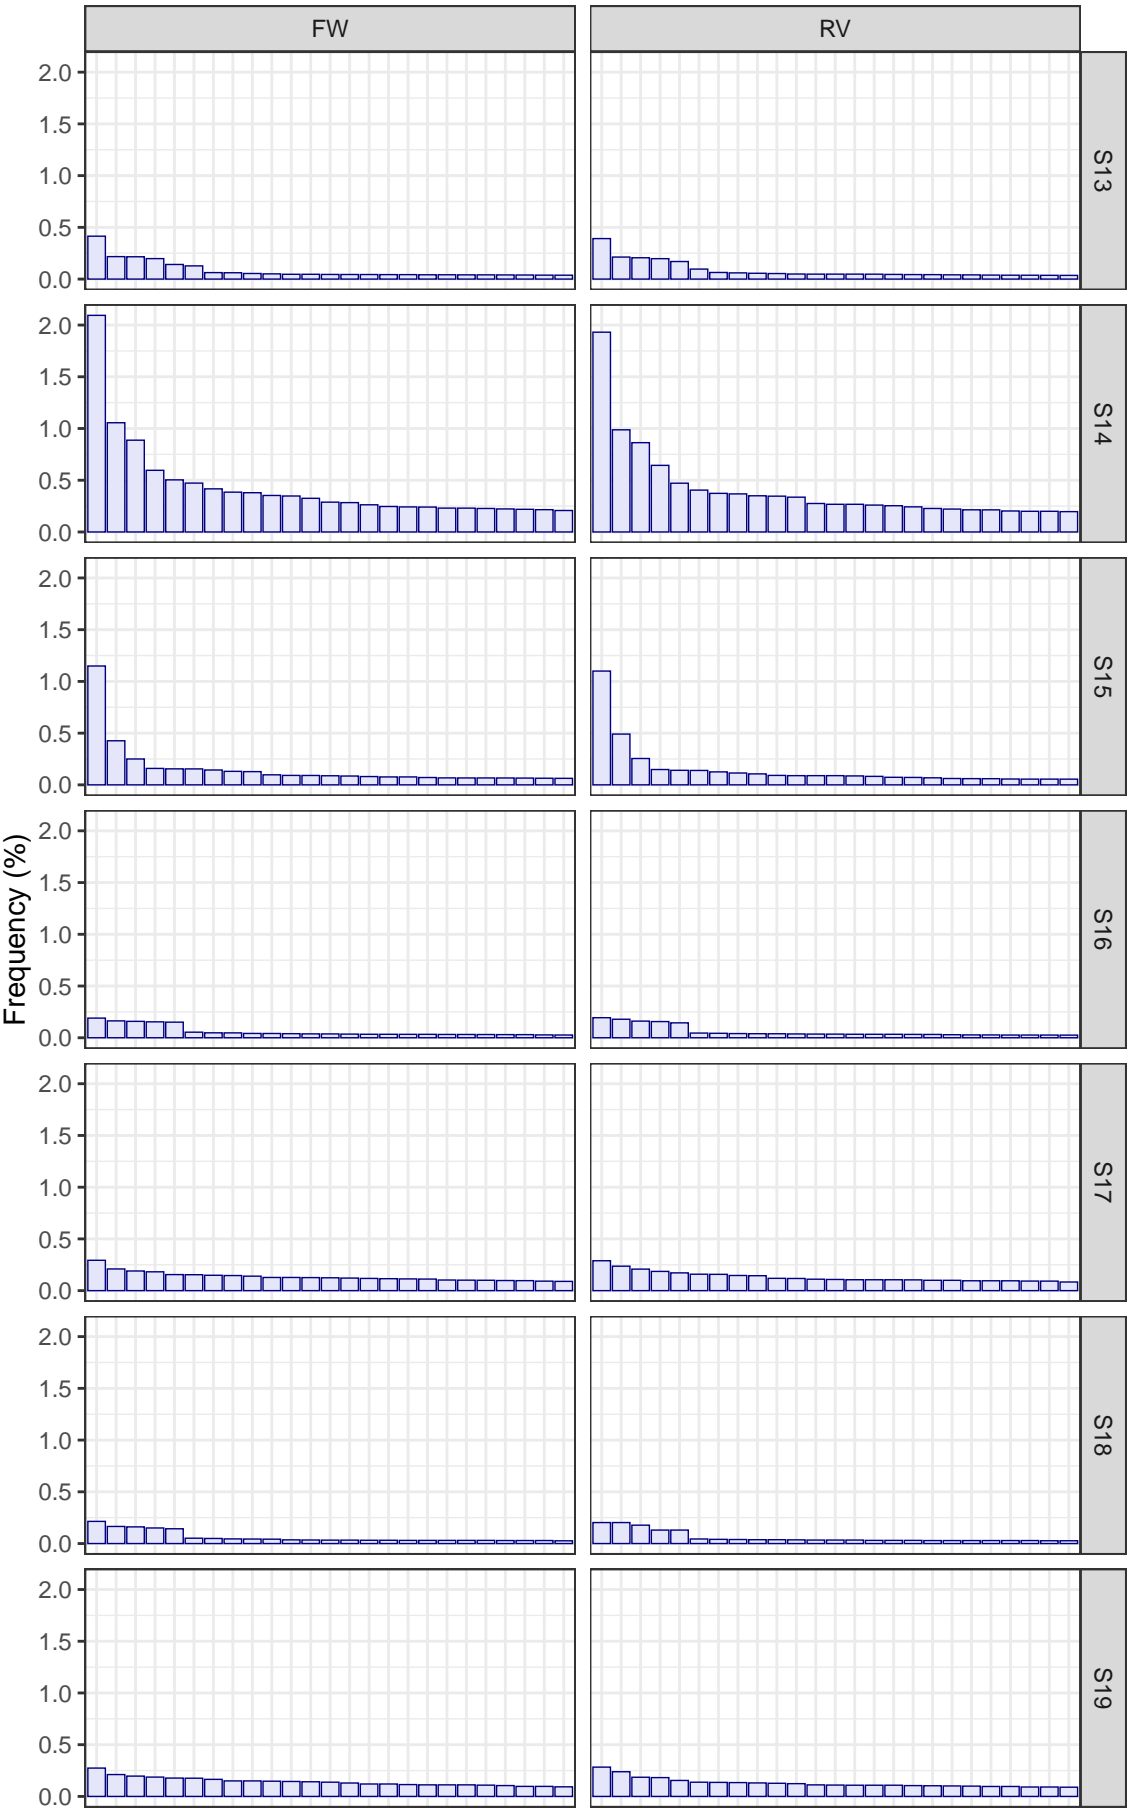

Supplement: s1 [file s1]

Percentage of total reads

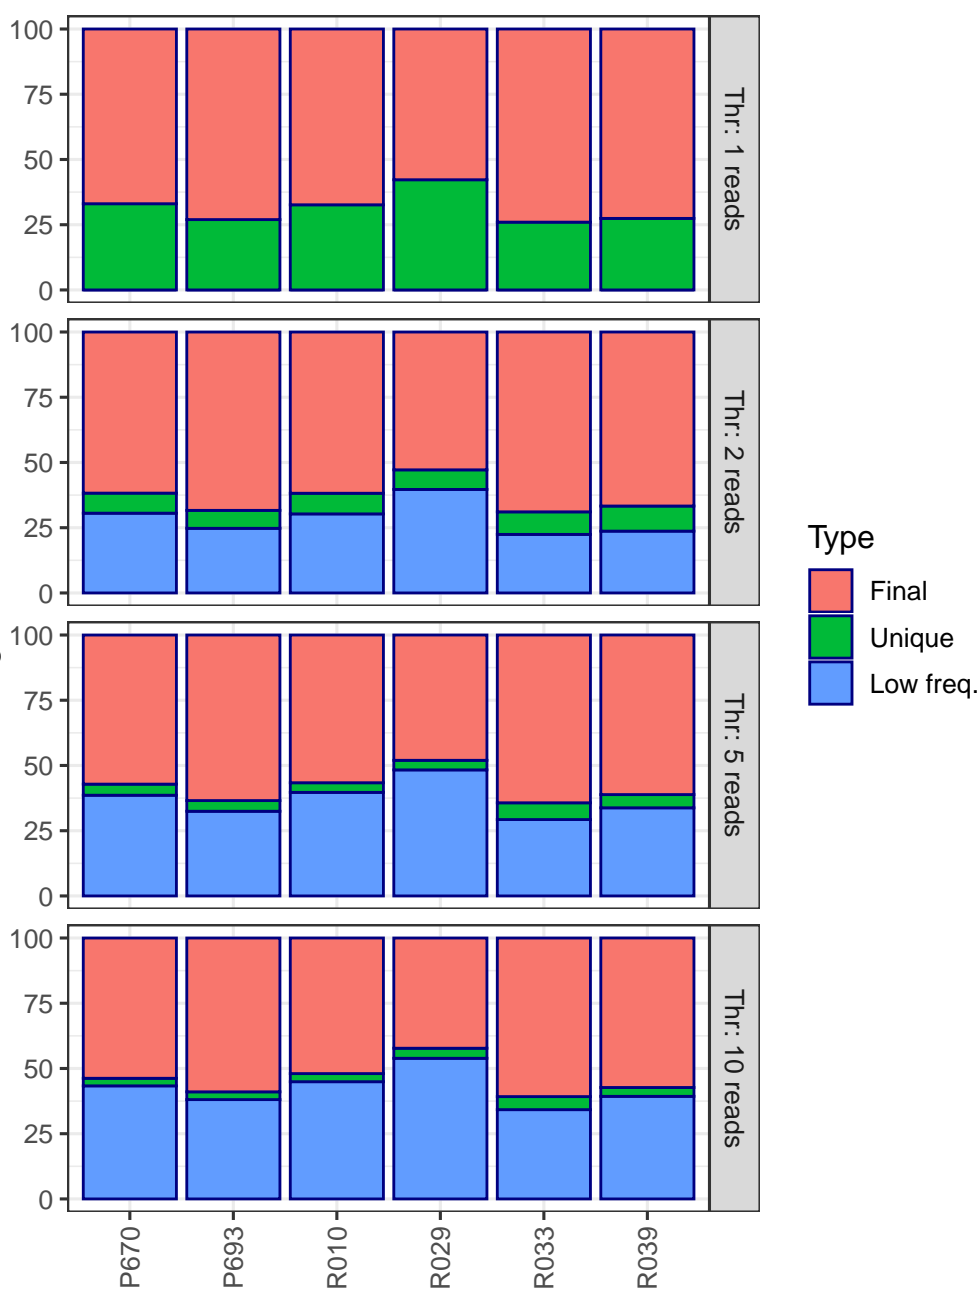

Supplement: s1 [file s1]

# Index of flatness at $q=1$

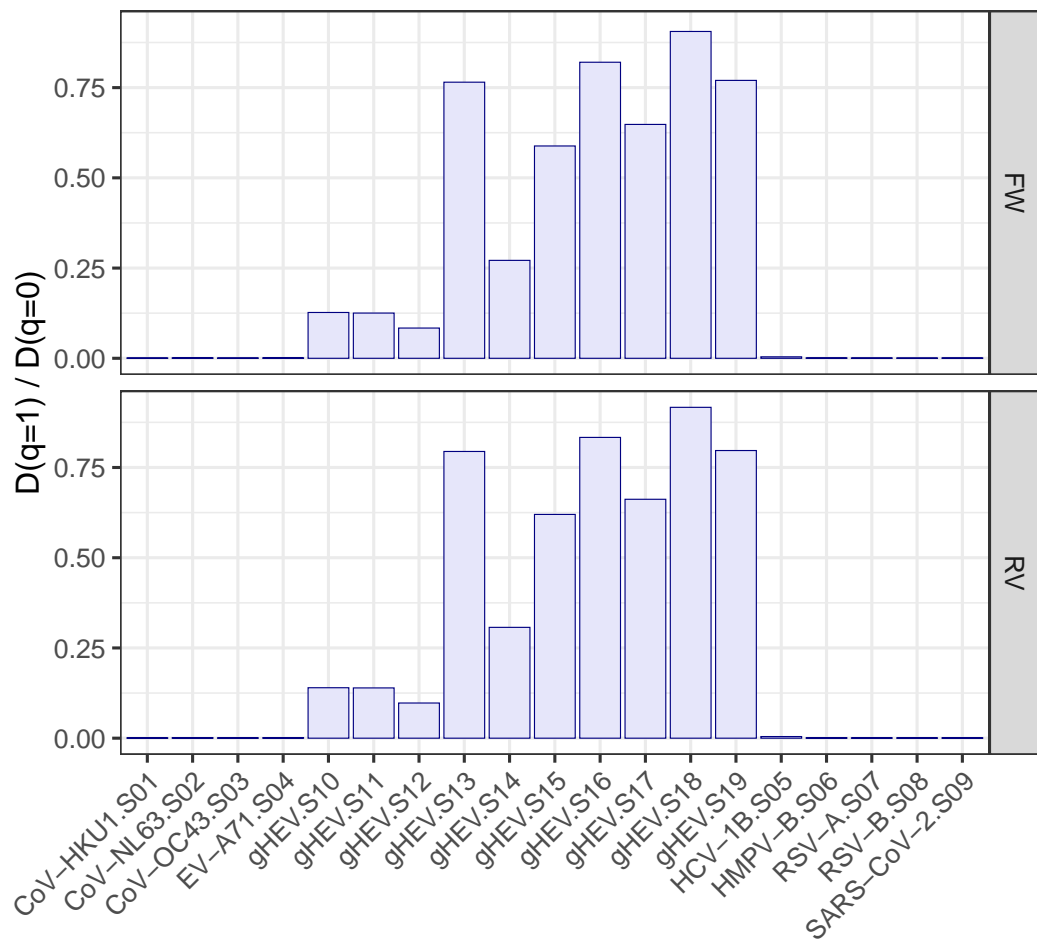

Supplement: s1 [file s1]

# Impact of freq. filter + strain intersection

Reads

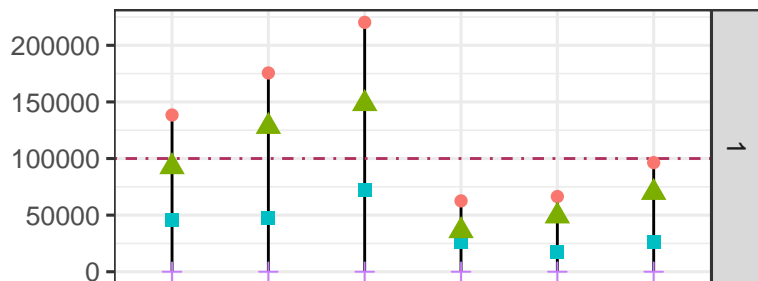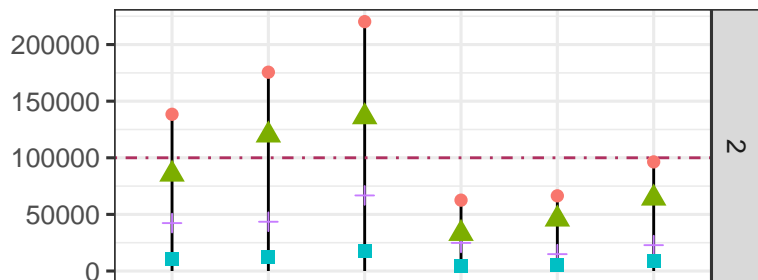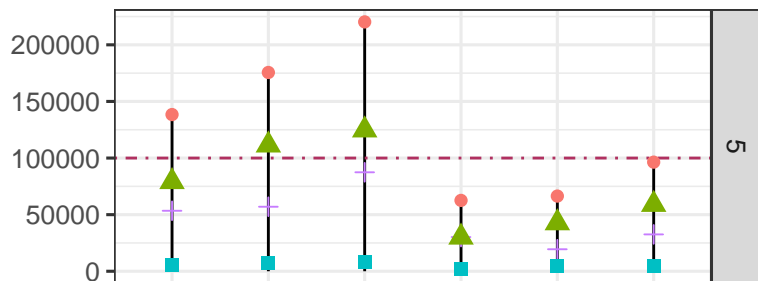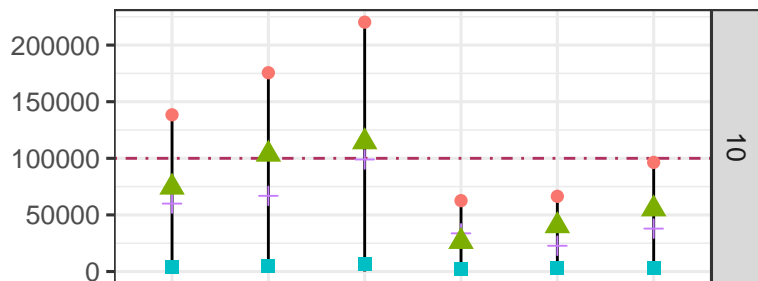

Type

- All
- Final
- Unique
- Low freq.

Supplement: s1 [file s1]

# Quasispecies fitness fractions (rarefied)

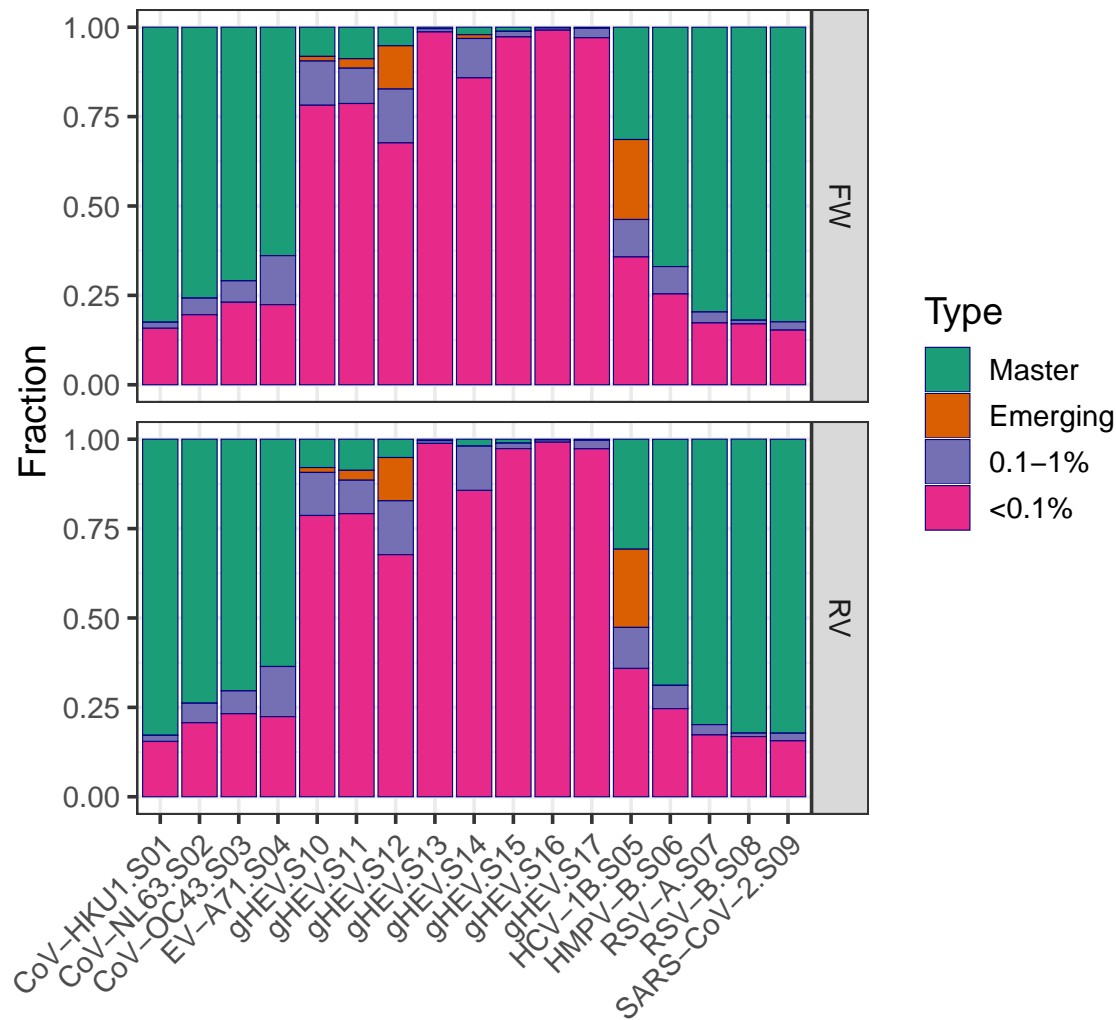

Supplement: s1 [file s1]

## Top 25 haplotypes

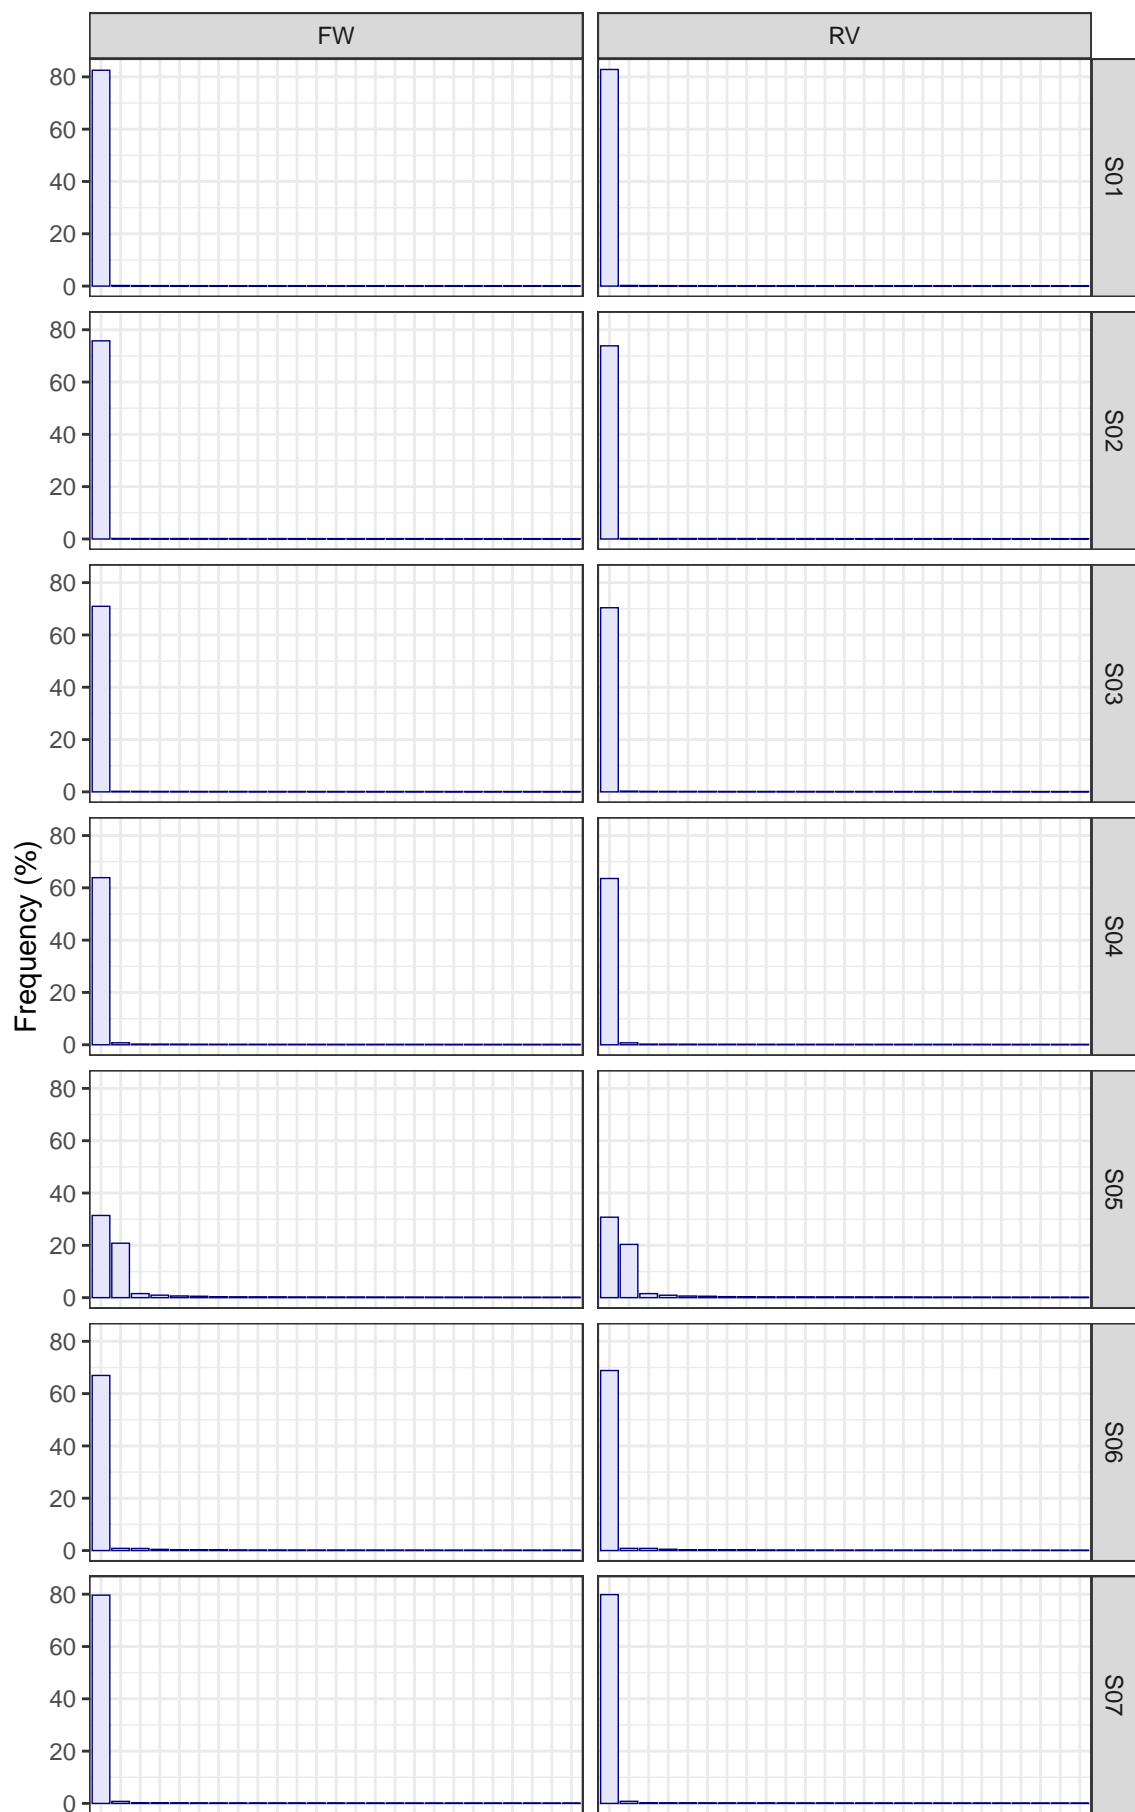

# Top 25 haplotypes



## Top 25 haplotypes

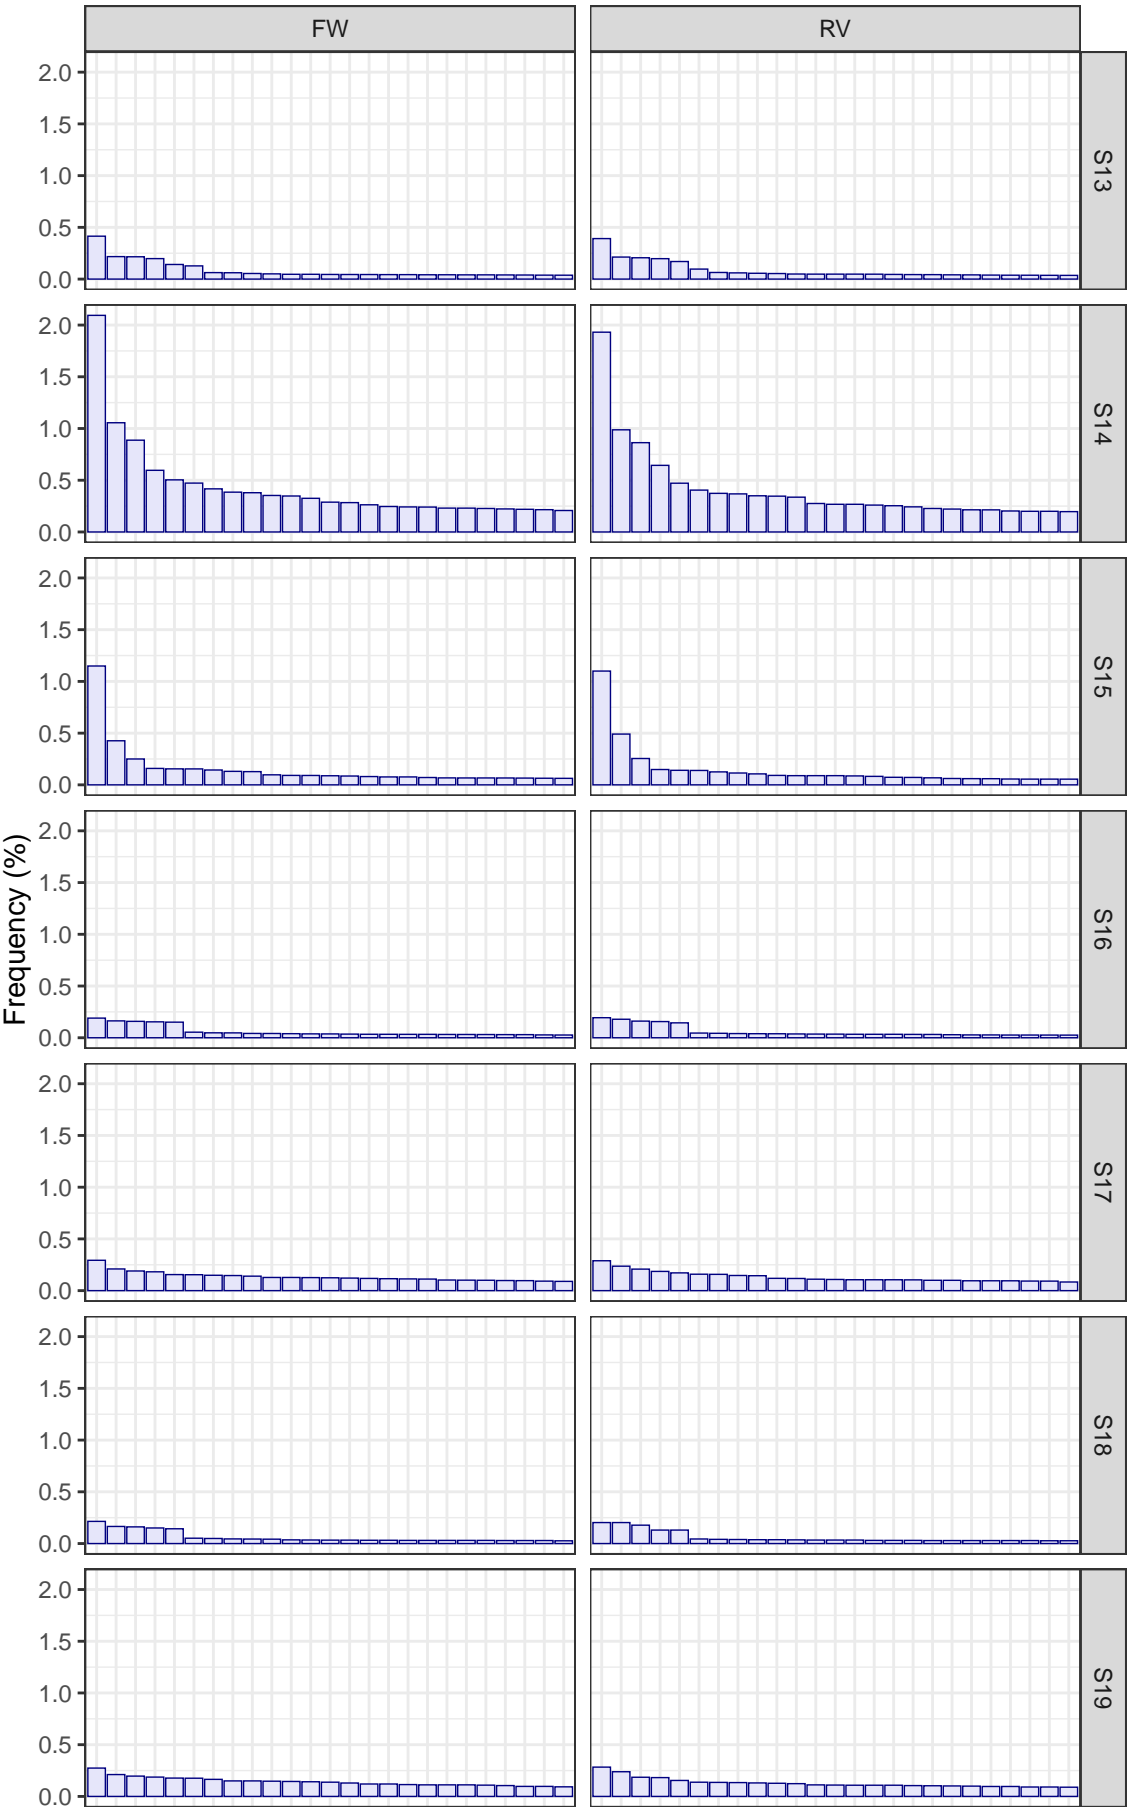

Supplement: s1 [file s1]

# Rarefaction impact on evenness

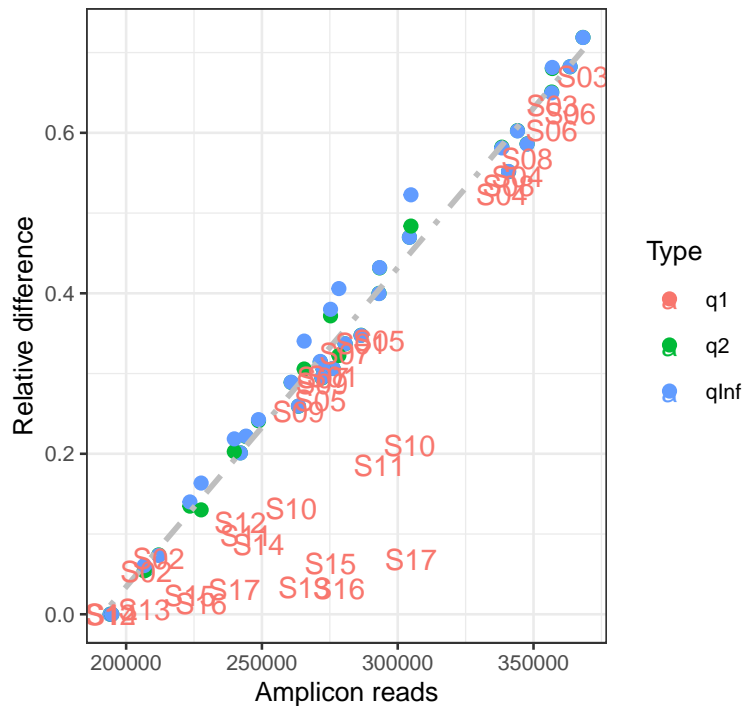

Supplement: s1 [file s1]

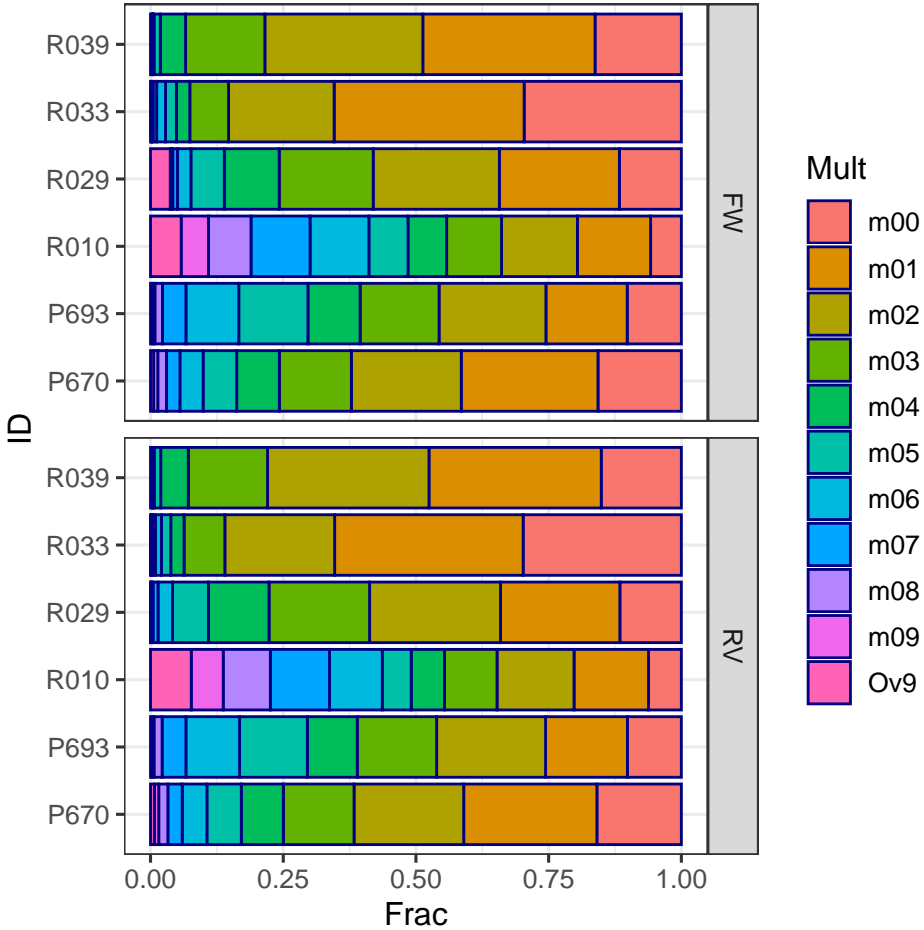

Supplement: s1 [file s1]

# Top 25 haplotypes

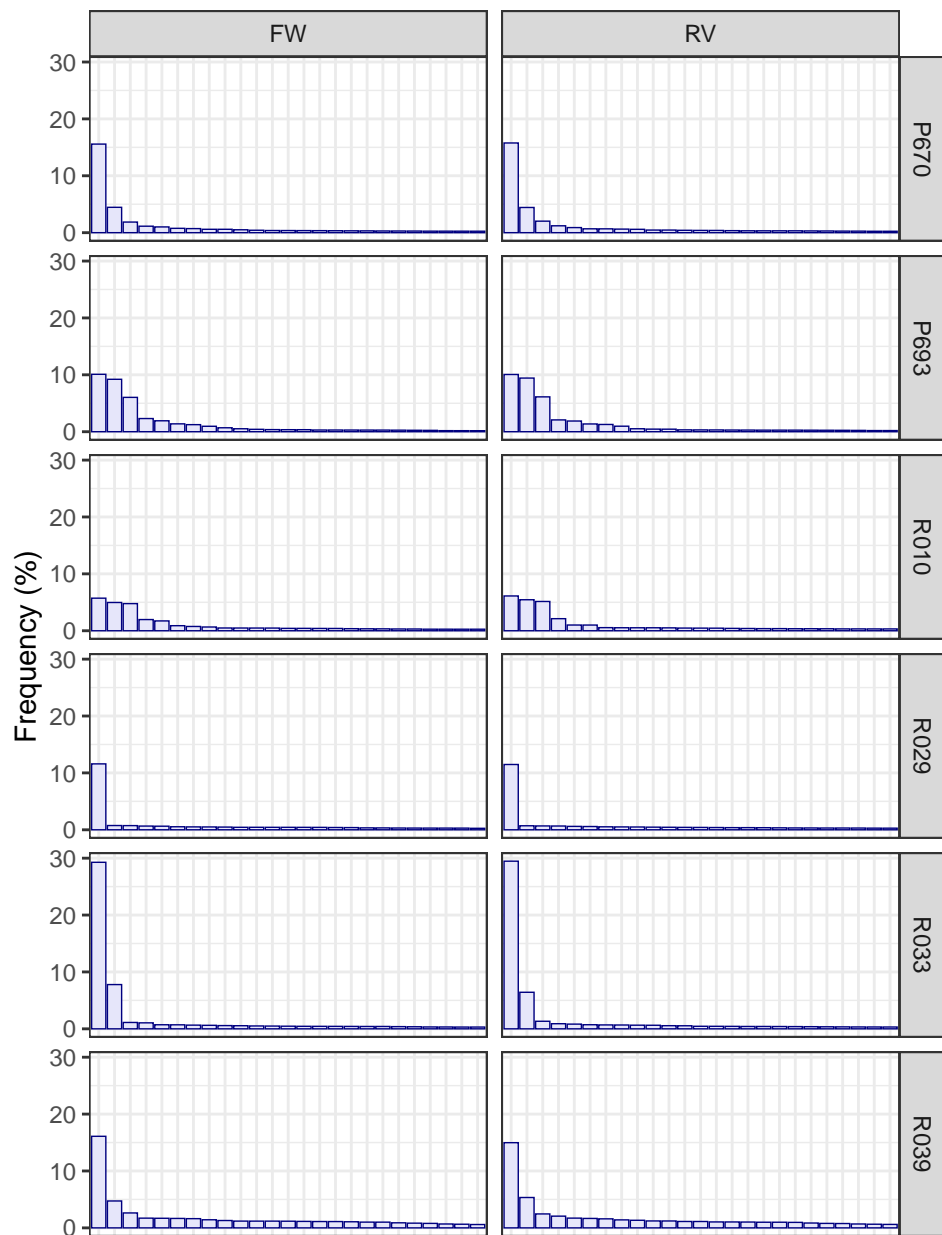

Supplement: s1 [file s1]

# Index of flatness at $q=\text{Inf}$

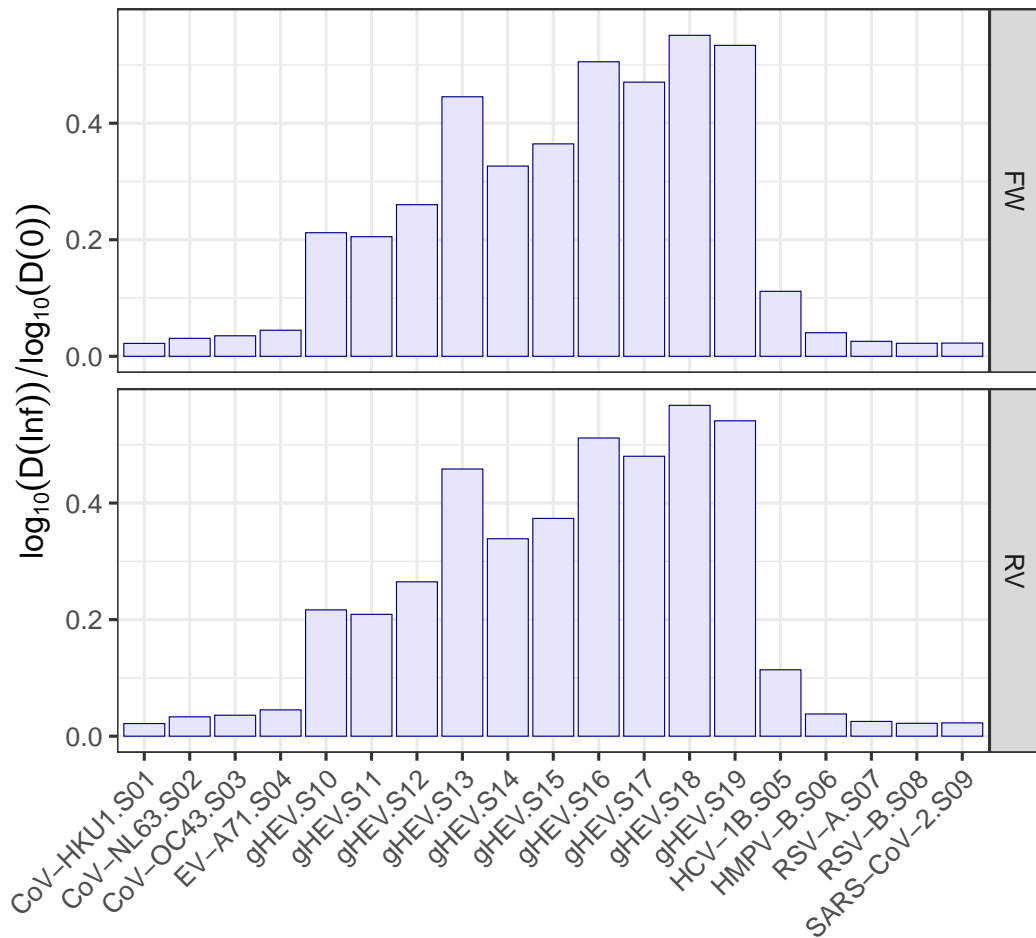

Supplement: s1 [file s1]

## Top 25 haplotypes

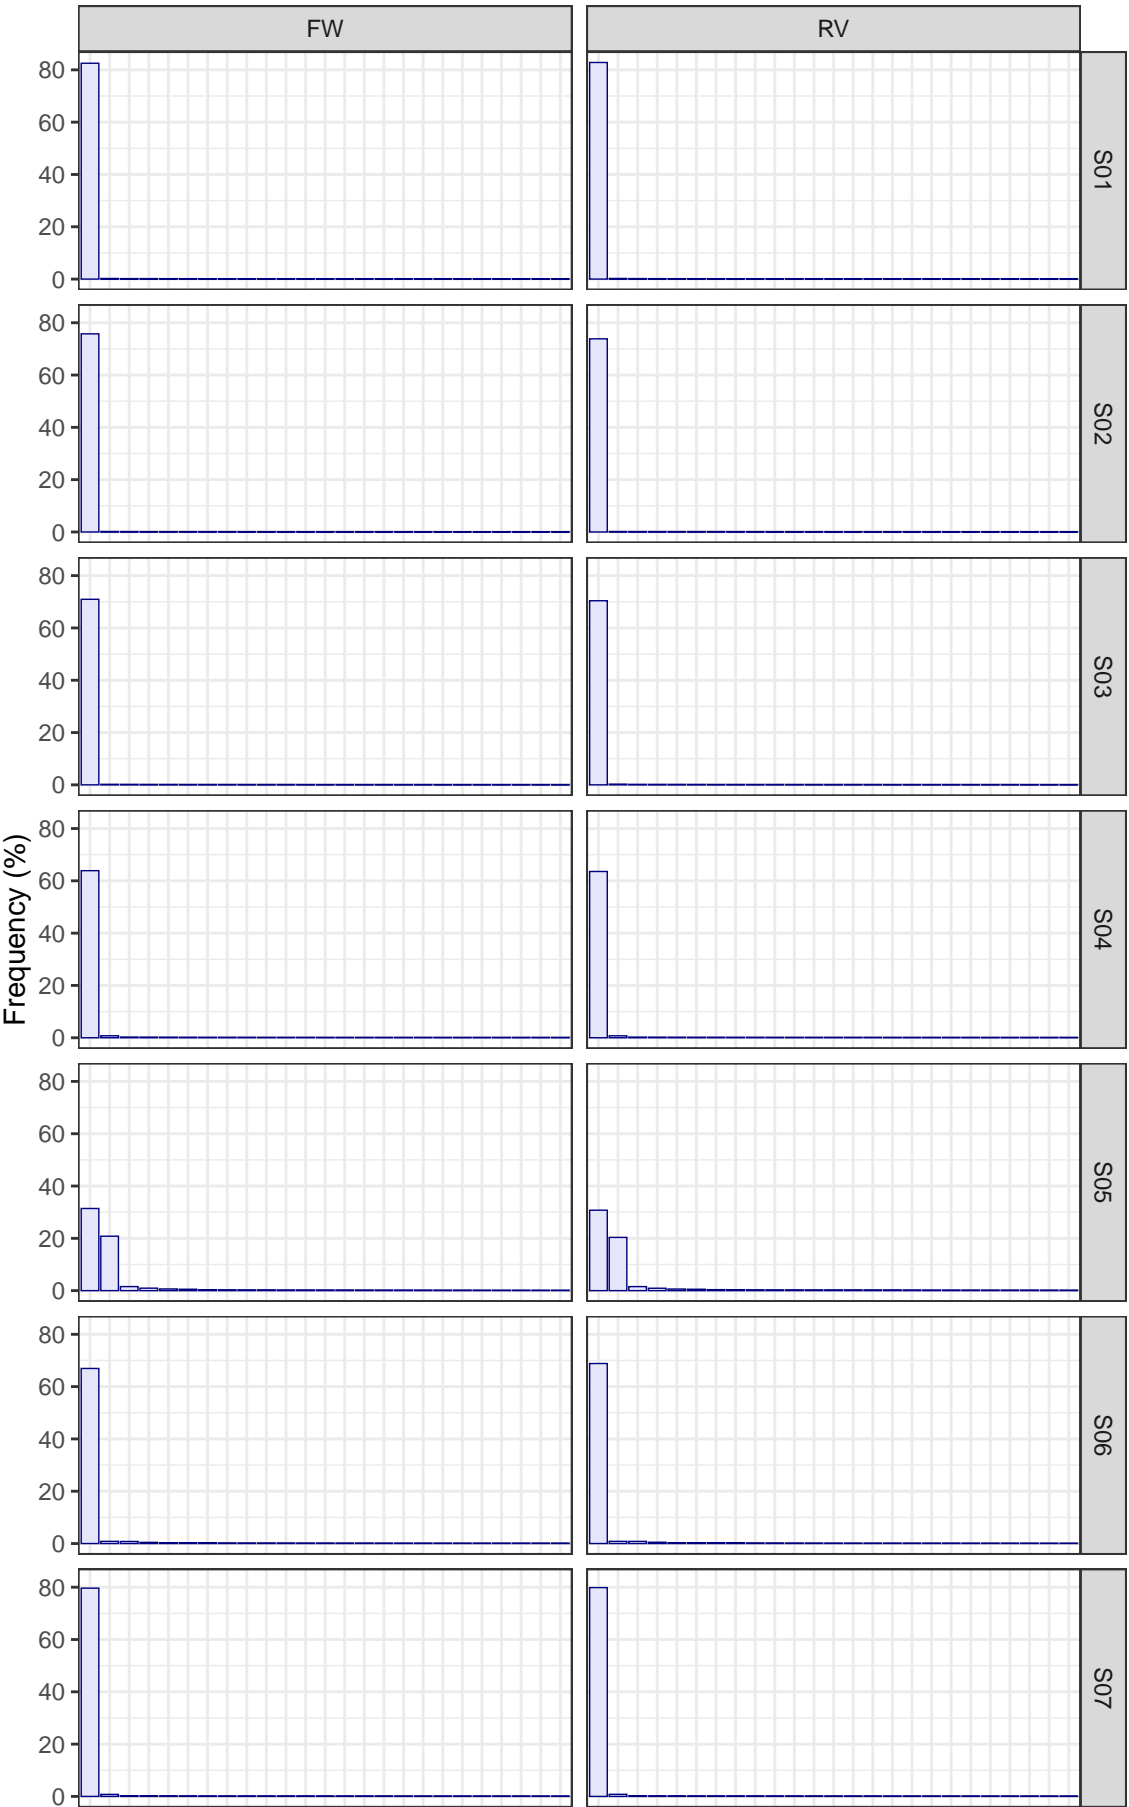

Supplement: s1 [file s1]

ID

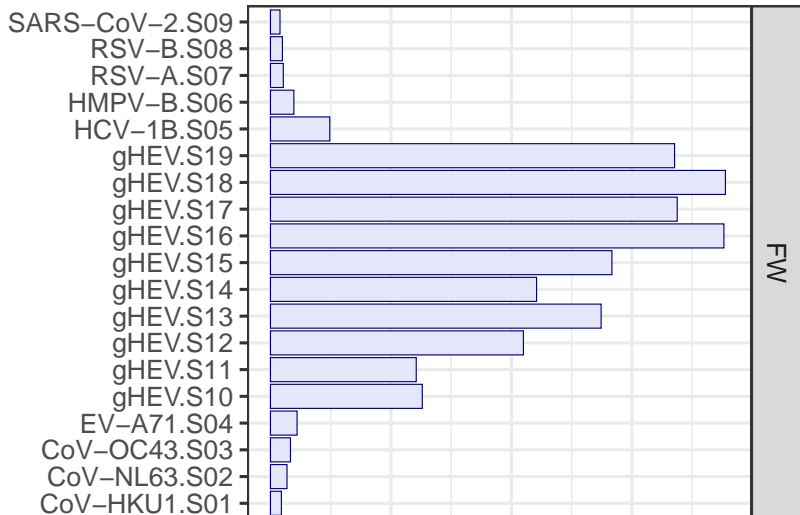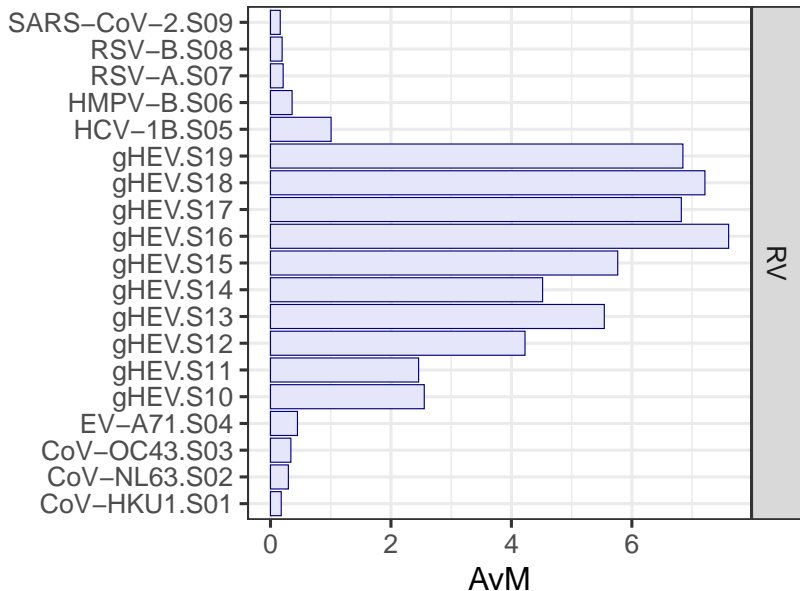

Supplement: s1 [file s1]
